1 **NOTCH1 signaling establishes the medullary thymic epithelial cell progenitor pool during**  
2 **mouse fetal development**

3  
4 Jie Li<sup>1</sup>, Julie Gordon<sup>1</sup>, Edward L. Y. Chen<sup>2</sup>, Luying Wu<sup>1</sup>, Juan Carlos Zúñiga-Pflücker<sup>2</sup>, and  
5 Nancy R. Manley<sup>1,3</sup>  
6

7 <sup>1</sup>Department of Genetics, University of Georgia, Athens, GA 30602

8 <sup>2</sup>Department of Immunology, University of Toronto, and Sunnybrook Research Institute,  
9 Toronto, ON M4N 3M5, Canada

10 <sup>3</sup>Corresponding author:

11 Nancy R. Manley

12 Department of Genetics, University of Georgia, 270B Coverdell Center

13 500 D.W. Brooks Drive

14 Athens, GA 30602

15 Tel.: 706-542-5861

16 Fax.: 706-583-0590

17 Email: nmanley@uga.edu

18 **Abstract**

19 The cortical and medullary thymic epithelial cell (cTEC and mTEC) lineages are essential for  
20 inducing T cell lineage commitment, T cell positive selection and the establishment of self-  
21 tolerance, but the mechanisms controlling their fetal specification and differentiation are poorly  
22 understood. Here, we show that Notch signaling is required to specify and expand the mTEC  
23 lineage. *Notch1* is expressed by and active in TEC progenitors. Deletion of *Notch1* in TECs  
24 resulted in depletion of mTEC progenitors and dramatic reductions in mTECs during fetal stages,  
25 consistent with defects in mTEC specification and progenitor expansion. Conversely, forced  
26 Notch signaling in all TEC resulted in widespread expression of mTEC progenitor markers and  
27 profound defects in TEC differentiation. In addition, lineage-tracing analysis indicated that all  
28 mTECs have a history of receiving a Notch signal, consistent with Notch signaling occurring in  
29 mTEC progenitors. Interestingly, this lineage analysis also showed that cTECs are divided  
30 between Notch lineage-positive and lineage-negative populations, identifying a previously  
31 unknown complexity in the cTEC lineage.

32 Notch signaling is a highly conserved pathway that plays a major role in the regulation of  
33 embryonic development and controls processes such as cell fate specification, differentiation and  
34 proliferation<sup>1</sup>. Notch is a transmembrane receptor protein, of which there are four (NOTCH1-4)  
35 in mammals. Importantly, Notch ligands are also membrane-bound, ensuring that ligand-receptor  
36 interactions can only occur between adjacent cells. Binding of a ligand to the receptor triggers a  
37 proteolytic event that cleaves the intracellular domain of the receptor, allowing it to enter the  
38 nucleus and regulate the expression of downstream genes.

39 The thymus is the primary lymphoid organ required for T cell production. The functional  
40 component of the thymus is comprised of thymic epithelial cells (TECs), which form a unique  
41 three-dimensional network that can be broadly divided into an outer cortex and an inner medulla.  
42 T cell differentiation takes place primarily via interactions between differentiating T cells and  
43 TECs, and a complete, organized and fully functional TEC compartment is essential for  
44 production of a diverse and self-tolerant T cell repertoire. Positive selection of T cells takes place  
45 in the cortex, where thymocytes capable of recognizing self-major histocompatibility complex  
46 (MHC) molecules are selected. The cells then enter the medulla and undergo negative selection  
47 to generate self-tolerant T cells that leave the thymus and enter the periphery. Notch signaling  
48 within lymphoid progenitor cells upon entry into the thymus is required for establishing T cell  
49 fate. Lymphocyte progenitors receive a NOTCH signal immediately upon entering the thymus,  
50 via interactions with the Delta-like 4 (Dll4) ligand on TECs<sup>2</sup>, that instructs them to commit to the  
51 T cell rather than alternative lineages<sup>3</sup>. NOTCH signaling is also required at multiple stages  
52 during T cell development for a variety of functions, including CD4 versus CD8 lineage  
53 commitment<sup>4</sup>. In addition to these critical and well-established roles in T cell differentiation,  
54 functional evidence has begun to emerge that suggests a role for NOTCH signaling in TECs. In  
55 addition to NOTCH ligands, TECs also express NOTCH receptors and pathway components<sup>5,6</sup>.  
56 Gain of function experiments suggest that NOTCH signaling is required to induce TEC  
57 development, particularly in the medullary lineage<sup>6,7</sup>. These initial studies suggest that NOTCH  
58 signaling could play important roles in the differentiation of both the lymphoid and epithelial  
59 compartments. However, definitive *in vivo* experiments to establish the normal roles of NOTCH  
60 signaling in TEC development have not been performed.

61 All TECs have a single embryonic origin in the 3<sup>rd</sup> pharyngeal pouch endoderm<sup>8</sup>, and  
62 functional studies suggest that TECs arise from a common thymic epithelial progenitor cell

63 (TEPC)<sup>9-11</sup>. The precise developmental origin of TEC subsets is the subject of ongoing debate.  
64 There is evidence for both bipotent progenitors in the fetal mouse thymus<sup>11,12</sup>, and for lineage-  
65 specific progenitors for cortical TECs (cTECs)<sup>13,14</sup> and medullary TECs (mTECs)<sup>15,16</sup>. There is  
66 also compelling evidence to suggest that a common progenitor population gives rise to mTEC  
67 lineage-specific progenitors<sup>15</sup>. Identifying key molecules involved in specification and  
68 maintenance of these different types of TEPCs will help to further elucidate how and when each  
69 lineage is specified during embryonic development.

70 We performed a series of loss- and gain-of-function and lineage tracing experiments to  
71 investigate the specific role of NOTCH1 signaling in fetal TEC development. Our results  
72 indicate that while all mTEC experience NOTCH signaling, only a subset of cTECs experience  
73 active NOTCH signaling, identifying a previously unappreciated aspect of cTEC differentiation.  
74 We also provide evidence of a requirement for NOTCH signaling in the establishment and  
75 maintenance/expansion of the mTEC progenitor pool in the fetal thymus.

76

## 77 **Results**

### 78 *NOTCH1 activity in TEC progenitors in the fetal thymus*

79 The NOTCH receptors and their downstream targets are expressed on TECs during late  
80 fetal development<sup>6</sup> (see accompanying Liu, et al. paper). We first used immunohistochemistry  
81 (IHC) to assess NOTCH1 expression and activity, indicated by nuclear localization of cleaved  
82 NOTCH1, in the developing thymus. We first detected NOTCH1 in the nucleus in a few cells in  
83 the thymus primordium at E11.25, some of which were FOXN1<sup>+</sup>, and therefore TECs (Fig. 1A;  
84 white arrows). Thus, active NOTCH1 signaling was first detected in a few TECs around the time  
85 of initial *Foxn1* expression (E11.25), and is present in a subset of TECs at later stages. More  
86 FOXN1<sup>+</sup> cells undergoing active NOTCH1 signaling were detected in the primordium just a few  
87 hours later (Fig. 1B), and were also present at E12.5 (Fig. 1C) and E14.5 (Fig. 1D). Next, we  
88 assessed Notch1 expression in TEC progenitors (TEPC) using an antibody against PLET1, a  
89 TEPC marker<sup>9,10,17</sup>. NOTCH1<sup>+</sup>FOXN1<sup>+</sup>PLET1<sup>+</sup> TECs were detected in the thymus at E13.5 (Fig.  
90 1E,F,G,H), suggesting that NOTCH1 signaling may play a role in early TEPCs during fetal  
91 thymus development.

92 To further assess NOTCH signaling in the fetal thymus, we used a CBF:H2B-Venus  
93 transgenic mouse line<sup>18</sup>. These mice express nuclear localized Venus in cells undergoing active



94 or recent NOTCH signaling. At E12.5, almost all of the Venus<sup>+</sup> cells were Ikaros<sup>+</sup> thymocytes  
95 undergoing active NOTCH signaling (Fig. 1I; white arrows), but a few Venus<sup>+</sup>Ikaros<sup>-</sup> cells were  
96 also present at this stage (Fig. 1I; green arrows). Co-staining with FOXP1 confirmed that these  
97 were TECs (Fig. 1J). Claudin3,4 (CLD3,4) marks mTEC progenitors in the fetal thymus at mid-  
98 gestation<sup>15</sup>; at E16.5 nearly all CLD3,4<sup>+</sup> cells expressed the CBF:H2B-Venus transgene (Fig.  
99 1K,L).

100 These data indicate that NOTCH1 signaling in TECs begins soon after the onset of *Foxn1*  
101 expression in a subset of cells that may represent progenitors, and that by E16.5 NOTCH1  
102 signaling may act specifically in mTEPCs.

103

#### 104 ***Notch1 deletion in TEC results in fewer TEC progenitors in the fetal thymus***

105 Since *Notch1* is expressed by a subset of fetal TECs, including potential mTEPCs, we  
106 used a loss-of-function approach to determine the role of NOTCH1 signaling in TEC  
107 differentiation. We used a *Notch1*<sup>fllox</sup> conditional allele<sup>19</sup> together with a *Foxn1*<sup>Cre</sup> deleter strain<sup>20</sup>  
108 to remove NOTCH1 function from TECs at the onset of their differentiation.

109 To determine the effect of loss of *Notch1* on TEPC populations during fetal thymus  
110 development we performed IHC for PLET1<sup>10</sup> and CLD3,4<sup>15</sup>. In control mice at E13.5, small  
111 clusters of PLET1<sup>+</sup> cells were present in the thymus (Fig. 2A). In the *Foxn1*<sup>Cre</sup>;*Notch1*<sup>fx/fx</sup> mutant  
112 thymus these clusters were rare and not always present (Fig. 2B). This phenotype was more  
113 severe at E16.5, when there were only a few PLET1<sup>+</sup> cells in the mutant thymus (Fig. 2C,D).  
114 CLD3,4<sup>+</sup> mTEC progenitors were also reduced at E13.5 and E16.5. Notably, in the control  
115 thymus, PLET1 and CLD3,4 were co-expressed at E13.5, whereas at E16.5 only a few cells co-  
116 expressed these markers (Fig. 2C; yellow arrows); most were positive for PLET1 or CLD3,4, but  
117 not both. These cells were arranged such that individual PLET1<sup>+</sup>CLD3,4<sup>+</sup> double positive cells  
118 were surrounded by PLET1<sup>+</sup> or CLD3,4<sup>+</sup> single positive cells (Fig. 2C), rather than in homotypic  
119 clusters. Conversely, in the *Foxn1*<sup>Cre</sup>;*Notch1*<sup>fx/fx</sup> mutant thymus, not only were there fewer  
120 PLET1 or CLD3,4 positive cells overall at E16.5, but all positive cells continued to express both  
121 PLET1 and CLD3,4 (Fig. 2D). The reduction in both the percentage and number of CLD3<sup>+</sup> cells  
122 was confirmed by flow cytometry at E17.5 ( $P < 0.05$ ) (Fig. 2E-G).

123 Together, these data show that *Notch1* deletion from TECs results in fewer putative fetal  
124 TEC progenitors, particularly mTEPCs, as shown by fewer PLET1 and CLD3,4 expressing cells.

125 Furthermore, there were few or no PLET1<sup>-</sup>CLD3,4<sup>+</sup> cells in the mutant thymus, suggesting a  
126 specific role for NOTCH1 in the lineage restriction of mTEC progenitors from a common  
127 progenitor during fetal thymus development.

128

### 129 ***TEC differentiation and organization is abnormal in $Foxn1^{Cre};Notch1^{fx/fx}$ mutants***

130 To assess TEC differentiation and function after *Notch1* deletion, we performed IHC  
131 using a well-defined panel of markers that identify specific TEC subsets within the cortical and  
132 medullary compartments of the fetal thymus. We used Keratin 8 (K8), CD205 and  $\beta 5t$  to label  
133 cTECs, and Keratin 5 (K5), Keratin 14 (K14), AIRE, and the lectin UEA1 to label mTEC  
134 subpopulations. In controls at E16.5, small distinct regions of K5, K14 and UEA1 positive cells  
135 mark the newly expanding medulla in the developing thymus (Fig. 3A,E,G). In the  
136  $Foxn1^{Cre};Notch1^{fx/fx}$  mutant thymus, the medulla primarily consisted of one larger central region  
137 rather than several smaller islands (Fig. 3B,E,F,H). This phenotype was also seen at the newborn  
138 stage (not shown). Furthermore, there were dramatically fewer AIRE<sup>+</sup> cells in the mutant thymus  
139 at E16.5 (Fig. 3C,D); an average of 21 cells per section for the control versus only one cell per  
140 section for the mutant, suggesting a nearly complete block in mTEC terminal differentiation.  
141 Flow cytometry confirmed the reduction in the number and frequency of mTECs in the  
142  $Foxn1^{Cre};Notch1^{fx/fx}$  mutant thymus at E17.5 ( $P < 0.05$ ; Fig. 3I).

143 As total TEC numbers were similar in control and  $Foxn1^{Cre};Notch1^{fx/fx}$  mutants ( $P =$   
144 0.32), the reduction in mTEC frequency was correlated with a relative increase in cTECs. The  
145 relative cTEC frequency was significantly increased (controls, 84.26 +/- 1.65; mutants, 93.71 +/-  
146 1.11;  $p = 0.0001$ ), although cTEC numbers were not significantly different ( $P = 0.27$ ). The cTEC  
147 markers  $\beta 5t$  and CD205 expression appeared normal at E16.5 (Fig. 3E-H). Therefore, the  
148 primary defect in TEC based on this analysis was in the mTEC lineage.

149 As the TEC microenvironment governs thymocyte development, we determined whether  
150 the observed TEC defects affected thymocyte populations. Early T cell precursors express  
151 neither CD4 nor CD8, and are termed double-negative (DN) thymocytes. DN cells are  
152 subdivided into four differentiation stages (DN1, CD44<sup>+</sup>CD25<sup>-</sup>; DN2, CD44<sup>+</sup>CD25<sup>+</sup>; DN3,  
153 CD44<sup>-</sup>CD25<sup>+</sup>; and DN4, CD44<sup>-</sup>Cd25<sup>-</sup>). Interactions with cTECs and mTECs mediate positive  
154 and negative selection, generating CD4<sup>+</sup> and CD8<sup>+</sup> single-positive (SP) T cells. Intrathymic T

155 cell development appeared normal in both *Foxn1<sup>Cre</sup>;Notch1<sup>fx/fx</sup>* (Fig. 3J), as the percentages of  
156 these different subsets were not different between mutants and controls.

157 In summary, NOTCH1 deletion in TEC at the onset of *Foxn1* initiation affects TEC  
158 organization and mTEC differentiation, but does not obviously affect T cell development in the  
159 fetal thymus.

160

161 ***Constitutive activation of Notch signaling in TECs leads to an increase in TEPCs and a block***  
162 ***in mTEC differentiation***

163 Given that *Notch1* deletion resulted in fewer TEPCs and an apparent block or reduction  
164 in mTEC differentiation, we predict that *Notch1* overexpression might have the opposite effect.  
165 We therefore activated NOTCH1 signaling in all TECs from the onset of their differentiation in  
166 gain-of-function experiments using a *Rosa<sup>NI-IC</sup>* inducible strain<sup>21</sup> activated by the *Foxn1<sup>Cre</sup>*  
167 deleter strain<sup>20</sup>. In the *Rosa<sup>NI-IC</sup>* mice, the NOTCH1 intracellular domain (N1-IC) targeted to the  
168 *Rosa26* locus; Cre-mediated deletion of a *loxP/stop/loxP* cassette results in heritable, constitutive  
169 expression of N1-IC, resulting in constitutive NOTCH1-mediated signaling. We analyzed  
170 *Foxn1<sup>Cre</sup>;Rosa<sup>NI-IC</sup>* embryos using markers of TECs, TEPCs and developing T cells.

171 While K5 and K8 are markers for medullary and cortical TECs, respectively, cells that  
172 co-express these markers are thought to contain a progenitor population, and are normally  
173 located at the cortico-medullary junction<sup>22</sup>. In the control E14.5 thymus, proto-medullary areas  
174 were beginning to down regulate K8 in the center surrounded by a band of K8<sup>+</sup>K5<sup>+</sup> cells, while  
175 the remainder of TEC were K5 negative, delineating the emerging cortical and medullary regions  
176 (Fig. 4A-C). However, in the *Foxn1<sup>Cre</sup>;Rosa<sup>NI-IC</sup>* thymus at the same stage, almost all TECs were  
177 K8<sup>+</sup>K5<sup>+</sup>, with only a few single K8<sup>+</sup> cells (Fig. 4D-F and inset). Furthermore, both PLET1 and  
178 CLD3,4 positive cells were expanded in the *Foxn1<sup>Cre</sup>;Rosa<sup>NI-IC</sup>* thymus at E15.5 (Fig. 4G-N).  
179 Although PLET1 and CLD3,4 single positive cells were present in the *Foxn1<sup>Cre</sup>;Rosa<sup>NI-IC</sup>*  
180 thymus, most of these cells expressed both markers. Flow cytometry at E15.5 showed about a 4-  
181 fold expansion in the frequency of CLD3<sup>+</sup> cells in the *Foxn1<sup>Cre</sup>;Rosa<sup>NI-IC</sup>* mutant thymus  
182 compared to littermate controls ( $P < 0.05$ ; Fig. 4O), and the number of CLD3<sup>+</sup> cells more than  
183 doubled in the mutant (an average of 1233 (SD = 387.1), versus 496 (SD = 50.1) cells in the  
184 controls ( $n = 3$ ;  $P = 0.03$ ). Total TEC cellularity was not different between mutant and control at  
185 this stage ( $P = 0.32$ ). Flow cytometry for UEA1 also revealed a dramatic expansion of the

186 medullary compartment in the *Foxn1<sup>Cre</sup>;Rosa<sup>NI-IC</sup>* mutant thymus (Fig. 4P) ( $P < 0.05$ ). This  
187 relative increase in progenitor-like phenotypes persisted at E18.5, by which time cysts lined with  
188 PLET1 and CLD3,4 positive cells had begun to appear (Fig. 4Q-X).

189 mTEC differentiation did not occur normally in the *Foxn1<sup>Cre</sup>;Rosa<sup>NI-IC</sup>* thymus. At E15.5,  
190 instead of the normal isolated islands of K14 expression (Fig. 5A), K14 was present throughout  
191 the mutant thymus, similar to K5 (Fig. 5B). There were also fewer and smaller clusters of  
192 UEA1<sup>+</sup> cells (Fig. 5B,D) and very few AIRE<sup>+</sup> cells compared to controls (Fig. 5C,D), indicating  
193 a block in mTEC terminal differentiation. By E18.5, this phenotype had progressed further.  
194 While widespread expression of K8, K5, and K14 showed that the thymus was still epithelial in  
195 nature, with (Fig. 5E-H), there was an almost complete absence of any recognizable organ  
196 structure at the newborn stage, as the epithelial network had essentially collapsed and the thymus  
197 was composed almost entirely of large cysts (Fig. 5I,J). Together, these data suggest that  
198 prolonged NOTCH1 signaling in TECs forces mTEC lineage commitment, but prevents  
199 differentiation, ultimately leading to a complete collapse of the TEC network.

200 In contrast to the loss-of-function models, thymocyte development was affected by the  
201 abnormal TEC microenvironment in the *Foxn1<sup>Cre</sup>;Rosa<sup>NI-IC</sup>* mice. The strongest effect was on  
202 total thymocyte numbers, which were reduced in the *Foxn1<sup>Cre</sup>;Rosa<sup>NI-IC</sup>* thymus, with an average  
203 of  $1.9 \times 10^6$  thymocytes (SD = 0.51) in the mutant thymus compared with  $12.5 \times 10^6$  (SD = 2.12) in  
204 the control ( $P = 0.002$ ). However, thymocyte differentiation was only mildly affected. Flow  
205 cytometry analysis of E16.5 *Foxn1<sup>Cre</sup>;Rosa<sup>NI-IC</sup>* thymocytes revealed a slightly lower percentage  
206 of CD4<sup>+</sup>8<sup>+</sup> cells (Fig. 5K), and an increase in DN3 (CD44<sup>-</sup>CD25<sup>+</sup>) cells (Fig. 5L) in the E16.5  
207 mutant thymus compared to controls, suggesting a mild block at the DN3-DN4 transition. By late  
208 fetal stages, the thymic structure had deteriorated beyond the ability to support any thymocyte  
209 development.

210 Thus, dysregulation of NOTCH signaling throughout the TEC compartment during fetal  
211 development results in an abnormal TEC environment with an expanded mTEPC compartment, a  
212 major block to mTEC differentiation, and eventually causes complete collapse of the epithelial  
213 network. These data further support a role for NOTCH1 signaling in specifying the mTEPC pool  
214 during fetal development. These data also suggest that while NOTCH1 must be present for  
215 mTEPC specification, prolonged and/or excessive NOTCH1 signaling is detrimental to their  
216 differentiation.

217

218 ***Mosaic deletion of Notch1 shows that mTEC specification requires NOTCH signaling***

219 *Foxn1*<sup>Cre</sup> initiates *Cre* expression at E11.25<sup>20</sup>, very similar to the timing with which  
220 mTEC specification may initiate<sup>23</sup>, and coincident with our expression data showing that active  
221 NOTCH1 signaling in TECs in the developing thymus until E11.25 (Fig. 1A). Thus, it is possible  
222 that the few mTECs that are present in the *Foxn1*<sup>Cre</sup>;*Notch1*<sup>fx/fx</sup> mutant thymus underwent  
223 specification prior to *Notch1* deletion. Since *Foxn1*<sup>Cre</sup> is also active throughout TEC  
224 differentiation, these cells could have deleted *Notch* after mTEC specification; but since *Notch*  
225 expression is dispensable for or even detrimental to mTEC differentiation, this later deletion  
226 would have no effect. It would, however, make it impossible for us to determine whether this  
227 scenario was correct, as we cannot determine whether *Notch* was deleted before or after mTEC  
228 specification in these mTECs.

229 To test this possibility, we deleted *Notch1* from throughout the pharyngeal endoderm  
230 using *Foxa2*<sup>CreER</sup> with a single pulse of tamoxifen at E8.5<sup>24</sup>, prior to the onset of *Foxn1*  
231 expression<sup>25</sup>. We have previously shown that this single pulse of CRE activity produces a mosaic  
232 deletion in the 3<sup>rd</sup> pharyngeal pouch<sup>26</sup>, ideal for testing whether *Notch1* deleted cells can  
233 contribute to the mTEC lineage. *Foxa2*<sup>CreER</sup>;*Notch1*<sup>fx/fx</sup> mice had fetal thymus phenotypes  
234 consistent with those obtained using *Foxn1*<sup>Cre</sup>, with reductions in both mTEC progenitor  
235 numbers and medullary size (Figs. S1, S2). Using PCR primers that selectively amplified either  
236 the undeleted or deleted allele, we performed qPCR on sorted cTEC and mTEC populations from  
237 Cre negative controls, *Foxa2*<sup>CreER</sup>;*Notch1*<sup>+fx</sup> heterozygotes, and *Foxa2*<sup>CreER</sup>;*Notch1*<sup>fx/fx</sup>  
238 homozygous mutants (Fig. 6A-C). As expected for mosaic deletion, all cell populations from all  
239 genotypes were positive for the undeleted allele, and the band corresponding to the deleted allele  
240 was absent from Cre negative controls and present in all cell populations in heterozygotes (Fig.  
241 6D). Strikingly, in *Foxa2*<sup>CreER</sup>;*Notch1*<sup>fx/fx</sup> homozygous mutants only cTEC populations had the  
242 deleted allele, which was completely absent in mTECs (Fig. 6D). These data strongly support the  
243 conclusion that specification to the mTEC lineage requires NOTCH1 signaling, and is consistent  
244 with the idea that mTEC that are present in the *Foxn1*<sup>Cre</sup>;*Notch1*<sup>fx/fx</sup> homozygous mutants had  
245 specified to the mTEC lineage prior to *Foxn1* expression.

246

247 ***Notch signaling is required in TECs at multiple fetal stages***

248 The *Foxa2*<sup>CreER</sup> and *Foxn1*<sup>Cre</sup> experiments support previous data showing that mTEC  
249 begin to be specified quite early in thymus organogenesis, at around the time that *Foxn1* is first  
250 expressed, and that mTEC specification is *Foxn1*-independent<sup>23</sup>. To test the timing of *Notch1*  
251 requirement in TECs across fetal development, we utilized a genetic system in which the  
252 NOTCH pathway transcription factor RBPj is deleted in all TEC using *Foxn1*<sup>Cre</sup>, and then the  
253 capacity to respond to normal, physiological NOTCH signals is reactivated in a temporal and cell  
254 type specific manner using doxycycline-controlled expression of transgenic RBPj-HA  
255 (RBPj<sup>fx/fx</sup>;Foxn1<sup>Cre</sup>;Rosa<sup>rtTA</sup>;Tet<sup>on</sup>-RBPj-HA)<sup>27</sup>. *Rbpj* deletion using *Foxn1*<sup>Cre</sup> resulted in similar  
256 phenotypes at E16.5 and NB stages as *Notch1* deletion, with many fewer mTEC, smaller  
257 medullary regions, and near complete loss of PLET1+ and CLD3,4+ cells (“un-induced”; Fig.  
258 7B, E, H, and L panels) (see also companion paper, Liu et al.). We then temporally activated  
259 Notch signaling responsiveness in TEC by providing doxycycline from E0-E14 (assayed at E16  
260 and NB), or from E14-NB (assayed at NB).

261 Having normal NOTCH signaling until E14 then withdrawing doxycycline resulted in a  
262 partial rescue of medullary phenotypes at both E16.5 and NB stages (Figs. 7 and 8). At E16,  
263 medullary area as measured by UEA-1+ cells was normal (Figs. 7F', 8A), although UEA-1  
264 intensity had started to decline (Fig. 8B), and both the number and intensity of CLD3,4+ cells  
265 was also less than controls (Figs. 7F, 8C,D). PLET-1 staining was also similar to controls (Figs.  
266 7A', C'; 8E). Thus, just 2 days after withdrawing NOTCH responsiveness mTEC markers had  
267 begun to decline. By the NB stage, UEA-1+ area and PLET1 intensity had begun to decline, and  
268 UEA-1 intensity remained similar to E16.5 (Fig. 7I, I', M'); these phenotypes were all improved  
269 relative to uninduced RBPj mutants, but remained less than controls (Fig. 8A, B, E). CLD3,4  
270 staining remained similar to that seen at E16.5, and now were also similar to RBPj mutants, in  
271 which CLD3,4+ ‘escapers’ have started to accumulate (Figs. 7M; 8C, D). Thus, NOTCH  
272 signaling prior to E14 appears to be sufficient to establish an mTEC pool, but it fails to either  
273 expand or be maintained properly after doxycycline withdrawal and removal of NOTCH  
274 signaling.

275 In contrast, restoration of NOTCH signaling responsiveness beginning at E14 and  
276 continuing until birth substantially restored medullary phenotypes at the NB stage. UEA-1,  
277 CLD3,4, and PLET1 intensity were all similar to controls, and significantly increased relative to  
278 both uninjected and E0-14 injected samples (Figs. 7J, J', M, M'; 8A, B, D, E). Only the number



279 of CLD3,4+ cells (measured as area) remained below controls, although was significantly  
280 improved relative to uninduced and E0-14 injected samples (Fig. 8C). Furthermore, in both E0-  
281 14 and E14-NB samples, CLD3,4 and PLET-1 staining was largely non-overlapping, similar to  
282 controls (Fig. S4), and distinct from the maintenance of overlapping staining seen in E16.5  
283 *Foxn1<sup>Cre</sup>;Notch1<sup>fx/fx</sup>* mutants (Fig. 2), demonstrating that progression from PLET-1+CLD3,4+ to  
284 expressing only one or the other marker is NOTCH1-dependent.

285 These data suggest that NOTCH signaling is required not only for initial mTEC lineage  
286 specification, but also for maintenance and/or expansion of the mTEC progenitors throughout  
287 fetal stages. These data are also consistent with the possibility that mTEC progenitors can be  
288 continue to be specified at later fetal stages.

289

### 290 ***Lineage analysis of active Notch signaling in the fetal thymus***

291 We used two NOTCH1 activity-trap mouse lines to trace the lineage of TECs  
292 experiencing relatively high (N1IP::Cre<sup>LO</sup>) or lower (N1IP::Cre<sup>HI</sup>) levels of NOTCH1  
293 activation<sup>28</sup>. In these two strains, the NOTCH1 intracellular domain was replaced with Cre, such  
294 that NOTCH1 signaling triggers proteolytic cleavage and Cre is able to move to the nucleus. We  
295 used these two strains to activate a CAG-tdTomato reporter<sup>29</sup> to permanently label cells  
296 receiving a NOTCH1 signal and their progeny. Co-staining the resulting fetal thymi with TEC  
297 markers allowed us to identify all TECs that arise from N1IP::Cre;tdTomato<sup>+</sup> cells through  
298 ontogeny. Interestingly, we observed different patterns of NOTCH1 signaling lineage history in  
299 the fetal thymus using these two lineage reporter lines (Figs. 9 and 10).

300 Analysis of the N1IP::Cre<sup>LO</sup>;tdTomato reporter (Fig. 9) at E14.5 identified only those  
301 cells that either themselves or their progenitors had experienced a *high* level of NOTCH1  
302 signaling prior to or at that stage. To assess TEC positive for this marker, we used both the  
303 tdTomato reporter and Foxn1::GFP to identify TEC (N1IP::Cre<sup>LO</sup>;tdTomato;Foxn1::EGFP) (see  
304 Fig. S3 for gating controls used for these two markers). At E14.5, a subset of medullary TECs  
305 marked by UEA1 staining were lineage-positive, (blue arrows, Fig. 9A-D), although a substantial  
306 fraction of mTEC were lineage-negative (yellow arrows, Fig. 9A-D). Consistent with this result,  
307 flow cytometry showed that around 75% of MHCII<sup>hi</sup>;UEA1<sup>+</sup> mTECs expressed the  
308 N1IP::Cre<sup>LO</sup>;tdTomato reporter at the newborn stage (Fig. 9E, right panel), while fewer than 1%  
309 of MHCII<sup>hi</sup>;UEA1<sup>-</sup> cTECs had experienced high levels of NOTCH1 activity (Fig. 9E, middle

310 panel). Almost all lineage-positive TECs (N1IP::Cre<sup>LO</sup>tdTomato<sup>+</sup>EpCAM<sup>+</sup>) and lineage-negative  
311 TECs (N1IP::Cre<sup>LO</sup>;tdTomato<sup>-</sup>) were Foxn1::EGFP<sup>+</sup>MHCII<sup>+</sup> (Fig. 9F), confirming the TEC  
312 identity of the cells. In terms of progenitors, CLD3,4<sup>+</sup> cells expressed the N1IP::Cre<sup>LO</sup>;tdTomato  
313 reporter (yellow arrows, Fig. 9L,M), whereas PLET1<sup>+</sup> cells did not (white arrows in Fig 9H-J).  
314 These data are consistent with our CBF:H2B-Venus reporter data (Fig. 1K,L) showing that the  
315 mTEPC pool is undergoing active NOTCH signaling; these data specifically show that CLD3,4<sup>+</sup>  
316 cells have experienced a high level of NOTCH1 signal. Lineage-positive non-TEC cells  
317 (N1IP::Cre<sup>LO</sup>tdTomato<sup>+</sup> cells negative for TEC markers) were vascular-associated, as indicated  
318 by co-expression with CD31 (white arrows, Fig. 9K-N) and PDGFR- $\beta$  (white arrows, Fig. 9O-  
319 R).

320 Next, we assessed the expression pattern of the N1IP::Cre<sup>HI</sup>;tdTomato reporter in the  
321 thymus at E14.5, which reports a broader range of NOTCH1 signaling (Fig. 10). Almost all  
322 UEA1<sup>+</sup> mTECs expressed the N1IP::Cre<sup>HI</sup>;tdTomato reporter at E14.5 by IHC (cyan arrows in  
323 Fig. 10C,D) and at the newborn stage by flow cytometric analysis (Fig. 10M). Consistent with  
324 our other expression, signaling, and lineage results, all CLD3,4<sup>+</sup> cells were  
325 N1IP::Cre<sup>HI</sup>;tdTomato<sup>+</sup> (arrows in Fig. 10E-H). However, in contrast to the results from the  
326 N1IP::Cre<sup>LO</sup> reporter, most or all PLET1<sup>+</sup> cells were also positive for this reporter (arrows in Fig.  
327 10I-L). These results support a model in which all TEPCs have experienced at least low levels of  
328 NOTCH1 signaling, while those receiving a high level of signaling commit to the mTEC fate.

329 Analysis of this reporter in cTECs showed that some lineage-positive Foxn1::GFP<sup>+</sup> TECs  
330 could also be detected in the cortex (white arrows in Fig. 10A-D). Flow cytometry revealed that  
331 around half of all cTECs (EpCam<sup>+</sup>UEA1<sup>-</sup>) were tdTomato<sup>+</sup> at the newborn stage (Fig. 10M).  
332 This finding reveals a previously unidentified split in the cTEC population, based on history of  
333 NOTCH1 signaling. Essentially all (> 98%) of the NOTCH1 lineage-positive cTECs  
334 (EpCam<sup>+</sup>UEA1<sup>-</sup>N1IP::Cre<sup>HI</sup>tdTomato<sup>+</sup>) were Foxn1::EGFP<sup>hi</sup> (Fig. 10M). However, none of the  
335 NOTCH1 lineage-negative cTECs expressed a high level of Foxn1::EGFP (Fig. 10M). These  
336 Foxn1::EGFP low cells also had lower MHCII surface levels than the Foxn1::EGFP high cells  
337 (MFI 256, SD = 18.73 vs. MFI 360, SD = 31.53;  $P = 0.008$ ). Thus, the expression levels of  
338 FOXN1 and MHCII are correlated in these cell populations consistent with previous studies, and  
339 the lower levels are also consistent with a less differentiated phenotype.

340 Finally, to assess the level of *current or recent* as opposed to a *history* of NOTCH



341 signaling, we analyzed CBF:H2B-Venus expression at E16.5. While a substantial fraction of  
342 mTECs and all CLD3,4<sup>+</sup> mTECs were Venus<sup>+</sup>FOXN1<sup>+</sup>, there were only rare Venus<sup>+</sup>FOXN1<sup>+</sup>  
343 cells in the cortex (Fig. 10N,O). This result suggests the existence of two distinct populations of  
344 cells within the lineage-negative cTECs, and suggests that the NOTCH lineage-positive cTECs  
345 may arise from a relatively small population of cTECs undergoing active NOTCH signaling.

346 In summary, we have generated a fate map of NOTCH1 signaling during TEC ontogeny  
347 using two NOTCH1 activity-trap mouse lines. Our data reveal that all mTECs, but only a subset  
348 of cTECs, have experienced NOTCH1 signaling during fetal thymus development.

349

## 350 Discussion

351 Thymic epithelial cells (TECs) represent the major functional component of the thymus,  
352 yet the mechanisms controlling their differentiation during fetal development remain largely  
353 unknown, particularly in terms of lineage specification and progenitor cell maintenance. In the  
354 current study, we provide evidence that NOTCH1 signaling is required to specify the lineage-  
355 restricted mTEC progenitor pool in the fetal thymus. We show that all mTEPCs in the fetal  
356 thymus exhibit active NOTCH1 signaling from early in organogenesis, and have a lineage  
357 history of high levels of NOTCH signaling. Ablation of *Notch1* in TECs results in fewer TEPCs  
358 and causes a block in specification of mTEC progenitors, as *Notch1* null TEC are unable to  
359 contribute to the mTEC lineage after mosaic deletion. In contrast, NOTCH1 activation in TECs  
360 results in an expansion of the TEPC pool, but then subsequent mTEC differentiation is also  
361 blocked. These data indicate that NOTCH signaling is required for specification of mTEC  
362 progenitors, and promotes their expansion, but that NOTCH signaling must cease for mTEC  
363 differentiation to mature phenotypes to occur. The fact the removal of NOTCH signaling in TEC  
364 after E14 results in progressive loss of the mTEC population also suggests that NOTCH  
365 signaling is required for maintenance of mTEC progenitors, or for their proliferation. The  
366 similarity in phenotypes from targeting RBPj and NOTCH1 suggests that at fetal stages *Notch1*  
367 is the major mediator of NOTCH signaling in TEC. A parallel study in the Blackburn lab  
368 targeting RBPj and thus globally affecting NOTCH signaling came to a similar conclusion (Liu,  
369 et al., companion paper).

370 The developmental origins of separate cortical and medullary TEC lineages and the  
371 existence and identity of bipotent TEC progenitors remains controversial. Whether they arise

372 from a common bipotent or individual lineage-restricted progenitors is still uncertain, with  
373 evidence for both<sup>11-16</sup>. Furthermore, it is still unclear exactly when and how the fetal and adult  
374 TEC progenitor populations arise and what their relationships may be. Our data do not  
375 definitively prove either the bipotent or the individual lineage-restricted progenitor model, but do  
376 provide clear indications of how different lineages are related, and show that mTEC and cTEC  
377 require different signals for specification.

378 We identify NOTCH1 as a key molecule required for the establishment and expansion of  
379 the mTEC progenitor pool. Our functional studies revealed that NOTCH1 pathway inhibition or  
380 activation both affected the mTEPC pool in the fetal thymus. Our data are consistent with a  
381 model in which NOTCH1 signaling acts on an early fetal bipotent progenitor that is  
382 PLET1<sup>+</sup>CLD3,4<sup>+</sup>, which gives rise to a PLET1<sup>-</sup>CLD3,4<sup>+</sup> mTEC-specific TEPC pool that has  
383 experienced high levels of NOTCH signaling, sometime between E13.5 and E16.5. Whether this  
384 PLET1<sup>+</sup>CLD3,4<sup>+</sup> TEPC also gives rise to the cortical lineage is not clear; as other lineage studies  
385 have suggested that all TECs arise from a progenitor expressing cortical markers<sup>13,14</sup>. However,  
386 it is clear that cTECs do not all experience NOTCH signaling, at least not at levels we can detect  
387 with our lineage reporters, and that cTEC in general can develop in the absence of NOTCH  
388 signaling. In either case, our data indicate that a bipotent progenitor would likely itself not  
389 experience NOTCH signaling, although its immediate daughter cells could.

390 We propose a model in which NOTCH1 signaling is required to generate the mTEPC  
391 pool during fetal thymus development (Fig. 11). Lineage restriction of these cells occurs  
392 according to whether or not the bipotent progenitor itself, or its daughter cells, experience high  
393 levels of NOTCH1 signaling. In this model, all TECs arise from a common bipotent progenitor  
394 cell, although it is also formally possible that the PLET1<sup>+</sup>CLD3,4<sup>+</sup> TEPC population contains  
395 separate cortical and medullary progenitors. Regardless, those cells that do receive a NOTCH1  
396 signal will become PLET1<sup>-</sup>CLD3,4<sup>+</sup> mTEC lineage-restricted TEPCs; those that do not become  
397 cTEC, either by default or under the influence of a second unknown signal. Thus, when *Notch1*  
398 is deleted from TECs (as in the *Foxn1<sup>Cre</sup>;Notch1<sup>fx/fx</sup>* and *Foxg1<sup>Cre</sup>;Notch1<sup>fx/fx</sup>* models presented  
399 here) the PLET1<sup>+</sup>CLD3,4<sup>+</sup> TEPCs fail to down regulate *Plet1* and the mTEPC lineage-restricted  
400 pool is not generated. Our data also show that *Notch1* must be down regulated for differentiation  
401 of the PLET1<sup>-</sup>CLD3,4<sup>+</sup> cells into more mature mTECs, consistent with previous reports<sup>7</sup>. Thus,  
402 in our *Foxn1<sup>Cre</sup>;Rosa<sup>NI-IC</sup>* over-expression model, prolonged NOTCH1 signaling prevents mTEC

403 differentiation and fewer mature AIRE<sup>+</sup> mTECs are made.

404 Our fate mapping lineage analysis showed that only half of fetal cTECs have experienced  
405 NOTCH1 signaling, and that these cTECs have uniformly higher levels of *Foxn1* and MHCII  
406 expression than those that are NOTCH lineage-negative. These data indicate that NOTCH  
407 signaling may also play a role in cTEC differentiation that is distinct from the mTEC role,  
408 uncovering a previously unidentified diversity within cTEC based on having experienced  
409 NOTCH signaling (Fig. 9). Compared to mTECs, little is known about the cTEC lineage and its  
410 development during ontogeny. As these two lineage-negative and lineage-positive populations  
411 also differ in their levels of *Foxn1* and MHCII expression, it is reasonable to conclude that these  
412 populations may be distinct either in their level of maturity or their function. Although we did  
413 not detect an obvious change in cTECs in our *Notch1* deletion model, the relative lack of cTEC  
414 markers means that we have little power to do so based on known markers. As a result, we can  
415 only speculate at this point what the relationship between these two cTEC subsets may be. As the  
416 lineage positive cTECs cannot give rise to lineage negative cTECs due to the nature of our  
417 reporters, either the lineage-negative cTECs must give rise to lineage-positive cTECs upon  
418 experiencing NOTCH signaling, or the two populations have to arise independently. Regardless,  
419 this result indicates that low level NOTCH signaling acts on cTECs, and opens new avenues of  
420 investigation into cTEC differentiation.

421 NOTCH signaling functions via cell-cell contact, therefore the NOTCH1 signal that  
422 TECs experience must be triggered by ligands expressed on adjacent cells. But what are these  
423 cells? What cells express the ligand(s), and what are the ligands? The cells could be other TECs,  
424 thymocytes, endothelial cells and/or neural crest-derived mesenchymal cells. It has been  
425 suggested that thymocytes are at least one source of ligand, and that an interaction between these  
426 two cell types is required for TEC development<sup>6</sup>. In the current study, we first observed active  
427 NOTCH1 signaling in *Foxn1*<sup>+</sup> cells at early E11.5, which is coincident with the first wave of  
428 lymphocyte entry to the primordium<sup>30</sup>, although it is clear in our data that TECs are not adjacent  
429 to thymocytes when undergoing NOTCH signaling. Of note, at this early stage there are few  
430 cellular sources of NOTCH ligands, and the most likely source based on our expression data are  
431 other fetal TECs, which express multiple NOTCH ligands, including *Jagged1* and *Delta-*  
432 *like4*<sup>5,6,30,31</sup> (Liu, et al, co-submitted paper). Whether the specific ligands and their cellular source

433 change during ontogeny, or have functional consequences for TEC biology, remain to be  
434 determined.

435

## 436 **Methods**

### 437 *Mice*

#### 438 **At UGA:**

439 *Notch1<sup>fllox</sup>* (Stock No. 006951), *Rosa<sup>NI-IC</sup>* (Stock No. 008159), *CBF:H2B-Venus* (Stock  
440 No. 020942) and *CAG-tdTomato* (Stock No. 007909) mice were obtained from The Jackson  
441 Laboratories (Bar Harbor, ME). N1IP::Cre<sup>HI</sup> and N1IP::Cre<sup>LO</sup> strains were a gift from Dr.  
442 Raphael Kopan (Cincinnati Children's Hospital Medical Center, Cincinnati, OH)<sup>28</sup>.  
443 *Foxn1::EGFP* (enhanced green fluorescent protein) mice were a gift from Dr. Thomas Boehm  
444 (Max Planck Institute of Immunobiology, Freiburg, Germany)<sup>32</sup>. *Foxn1<sup>Cre</sup>* and *Foxa2<sup>Cre</sup>* strains  
445 have been described elsewhere<sup>20,33</sup>. All colonies were maintained on a majority C57BL6/J  
446 genetic background. Noon on the day of detecting a vaginal plug was designated embryonic day  
447 0.5 (E0.5), and confirmed by morphological features.

448 All mice and embryos were genotyped by PCR using DNA extracted from tail tissue.  
449 EGFP primer sequences were: fwd, GTT CAT CTG CAC CAC CGG C; rev, TTG TGC CCC  
450 AGG ATG TTG C. Primer sequences for *Notch1<sup>fllox</sup>*, *Rosa<sup>NI-IC</sup>*, *CBF:H2B-Venus*, *CAG-*  
451 *tdTomato*, *Foxn1<sup>Cre</sup>* (*Foxn1<sup>ex9cre</sup>*, Stock No. 018448), and *Foxg1<sup>Cre</sup>* (Stock No. 006084) strains  
452 are available from The Jackson Laboratories (Bar Harbor, ME). In all cases, Cre negative  
453 animals or embryos were used as littermate controls. n-values for all experiments are shown in  
454 figure legends.

455 All experiments involving animals were performed with approval from the UGA  
456 Institutional Animal Care and Use Committee.

#### 457 **At Toronto:**

458 RBPj-inducible (RBPj<sup>ind</sup> or RBPj<sup>fx/fx</sup>;Rosa<sup>rtTA</sup>;Tet<sup>on</sup>-RBPj-HA) mice, described elsewhere  
459 <sup>27</sup>, were bred to FoxN1<sup>cre</sup> mice (RBPj<sup>fx/fx</sup>;Foxn1<sup>Cre</sup>;Rosa<sup>rtTA</sup>;Tet<sup>on</sup>-RBPj-HA) and maintained in  
460 the Comparative Research Facility of the Sunnybrook Research Institute under specific  
461 pathogen-free conditions. All animal procedures were approved by the Sunnybrook Research  
462 Institute Animal Care Committee and performed in accordance with the committee's ethical

463 standards. For induction of Notch responsiveness, pregnant mice were given 1 mg/ml  
464 Doxycycline (Sigma-Aldrich) in drinking water supplemented with 5% Splenda *ad libitum*.

#### 465 ***Immunofluorescence and histology***

466 For cryosectioning, mouse embryos were snap frozen in liquid nitrogen and stored at -  
467 80°C. Tissues were sectioned at 8  $\mu$ m and fixed in ice-cold acetone for 2  $\square$ min. Tissues were  
468 rinsed with phosphate buffered saline (PBS), blocked with 10% donkey serum in PBS for  
469 30  $\square$ min at room temperature, then incubated with appropriate primary antibodies overnight at  
470 4°C: anti-cleaved NOTCH1 (Cell Signaling Technologies, 4147, 1:200), anti-NOTCH1  
471 (Origene, EP1238Y, 1:200), anti-Foxn1 (Santa Cruz, G-20, 1:200), anti-CD31 (BD, MEC13.3,  
472 1:100), anti-PDGFR- $\beta$  (R&D Systems, AF1042, 1:50), anti-Ikaros (Santa Cruz, M-20, 1:200),  
473 anti-GFP (Abcam, ab13970, 1:200), anti-Plet1 (rat supernatant from cell line ID4-20), anti-  
474 Claudin3 (Life Technologies, 34-1700, 1:200), anti-Claudin 4 (Life Technologies, 36-4800,  
475 1:200), anti- $\beta$ 5t (MBL, PD021, 1:200), anti-CD205 (BioLegend, 138202, 1:200), anti-Aire  
476 (Santa Cruz, M-300, 1:200), anti-K5 (Covance, AF138, 1:1,000), anti-K8 (rat supernatant,  
477 Troma1), anti-K14 (Covance, AF64, 1:1,000) or UEA1 lectin (Vector Labs, X0922, 1:400).  
478 Secondary detection was performed with donkey anti-primary species. For  
479 *NIIP::Cre;tdTomato;Foxn1::EGFP* observation, tissues were fixed in 4% paraformaldehyde  
480 (PFA) in PBS for 5  $\square$ min at 4°C, washed with PBS followed by 10% sucrose/PBS for 1  $\square$ h, then  
481 30% sucrose/PBS overnight. Tissues were embedded in OCT and stored at -80°C until  
482 sectioning. Sections were examined by fluorescent microscopy using a Zeiss Axioplan 2  
483 microscope (Thornwood, NY).

484 For paraffin sectioning, tissues were collected and fixed in 4% PFA for 2-3 h. Tissues  
485 were dehydrated through an ethanol series (70%, 80%, 90%, 96%, 100%) and embedded in  
486 paraffin wax using standard procedures. Sections (8  $\square$  $\mu$ m) were cut and rinsed in xylene before  
487 rehydration through a reverse ethanol series. Antigen retrieval was performed by boiling slides in  
488 10 mM sodium citrate buffer, pH 6, for 30 min. Sections were stained using appropriate primary  
489 and secondary antibodies as described above, and imaged using fluorescence microscopy.

490 Hematoxylin and eosin (H&E) staining was performed on paraffin sections using  
491 standard procedures, then imaged on a Zeiss Axioplan microscope (Thornwood, NY).

492

#### 493 ***Flow cytometry***

494 For TEC analysis, fetal or newborn stage thymi were dissected and digested in 1 mg/mL  
495 collagenase/dispase (Roche, Basel, Switzerland), and passed through a 100- $\mu$ m mesh to remove  
496 debris. Thymi were processed individually, before genotyping. PE-Cy7 conjugated anti-CD45  
497 (BioLegend, 30-F11, 1:150) and APC-conjugated anti-EpCam (BioLegend, G8.8, 1:150) were  
498 used to isolate TEC populations. UEA1 lectin, anti-Claudin 3 and anti-MHCII (M5/114.15.2,  
499 BioLegend, 1:150) were used in the TEC analysis. Cells were refixed in 1% PFA/PBS and  
500 analyzed using a CyAn ADP Flow Cytometer (Beckman Coulter, Miami, FL). Data were  
501 collected using a four-decade log amplifier and stored in list mode for subsequent analysis using  
502 FlowJo Software (Tree Star, Ashland, OR).

503 Thymocytes were harvested from individual fetal or newborn stage thymi and suspended  
504 in FACS buffer (PBS with 2% fetal bovine serum (FBS)). Thymi were processed individually,  
505 before genotyping. Cells were incubated with conjugated monoclonal antibodies CD4-FITC  
506 (BioLegend, GK1.5, 1:150), CD8-PE (BioLegend, 53-6.7, 1:150), CD25-APC (BD, PC61,  
507 1:150) or CD44-PerCP (BioLegend, IM-7, 1:150), at 4°C for 30 min, washed, and fixed with  
508 1% PFA (EM Sciences, Ft. Washington, PA) before analysis on a CyAn ADP Flow Cytometer  
509 (Beckman Coulter, Miami, FL). Data were collected on using a four-decade log amplifier and  
510 were stored in list mode for subsequent analysis using FlowJo Software.

### 511 ***Cell isolation and genomic PCR***

512 E15.5 thymi were harvested and processed individually to generate a single cell  
513 suspension (as described above). TEC populations were isolated based on staining with PE-Cy7  
514 conjugated anti-CD45, APC-conjugated anti-EpCam, UEA1 lectin and anti-MHCII as described  
515 in the text. DNA was purified from sorted cell populations using QIAamp DNA Mini kit  
516 (QIAGEN). PCR was performed using the following primer sequences: fwd-1 (undeleted  
517 allele), TAC TTA GAG CGG GGC AGA GA; fwd-2 (deleted allele), CTG AGG CCT AGA  
518 GCC TTG AA; rev (both deleted and undeleted alleles), ACT CCG ACA CCC AAT ACC TG.

### 519 ***Statistics***

520 Data are presented as mean  $\pm$  S.D. N values were at least 3 for each genotype in each  
521 experiment and are indicated in the text and/or Figure legends. Comparisons between two groups  
522 were made using Student's *t* test, multiple comparisons used ANOVA.  $P < 0.05$  was considered  
523 significant.

524



525 **References**

- 526 1 Kopan, R. Notch signaling. *Cold Spring Harbor perspectives in biology* **4**,  
527 doi:10.1101/cshperspect.a011213 (2012).
- 528 2 Hozumi, K. *et al.* Delta-like 4 is indispensable in thymic environment specific for T cell  
529 development. *J Exp Med* **205**, 2507-2513, doi:jem.20080134 [pii] 10.1084/jem.20080134  
530 (2008).
- 531 3 Pui, J. C. *et al.* Notch1 expression in early lymphopoiesis influences B versus T lineage  
532 determination. *Immunity* **11**, 299-308, doi:S1074-7613(00)80105-3 [pii] (1999).
- 533 4 Maekawa, Y. *et al.* Delta1-Notch3 interactions bias the functional differentiation of  
534 activated CD4+ T cells. *Immunity* **19**, 549-559 (2003).
- 535 5 Griffith, A. V. *et al.* Spatial mapping of thymic stromal microenvironments reveals unique  
536 features influencing T lymphoid differentiation. *Immunity* **31**, 999-1009, doi:S1074-  
537 7613(09)00502-0 [pii] 10.1016/j.immuni.2009.09.024 (2009).
- 538 6 Masuda, K. *et al.* Notch activation in thymic epithelial cells induces development of thymic  
539 microenvironments. *Mol Immunol* **46**, 1756-1767, doi:S0161-5890(09)00049-2 [pii]  
540 10.1016/j.molimm.2009.01.015 (2009).
- 541 7 Goldfarb, Y. *et al.* HDAC3 Is a Master Regulator of mTEC Development. *Cell Rep* **15**, 651-  
542 665, doi:10.1016/j.celrep.2016.03.048 (2016).
- 543 8 Gordon, J. *et al.* Functional evidence for a single endodermal origin for the thymic  
544 epithelium. *Nat Immunol* **5**, 546-553, doi:10.1038/ni1064ni1064 [pii] (2004).
- 545 9 Bennett, A. R. *et al.* Identification and characterization of thymic epithelial progenitor cells.  
546 *Immunity* **16**, 803-814, doi:S1074761302003217 [pii] (2002).
- 547 10 Depreter, M. G. *et al.* Identification of Plet-1 as a specific marker of early thymic epithelial  
548 progenitor cells. *Proc Natl Acad Sci U S A* **105**, 961-966, doi:0711170105 [pii]  
549 10.1073/pnas.0711170105 (2008).
- 550 11 Bleul, C. C. *et al.* Formation of a functional thymus initiated by a postnatal epithelial  
551 progenitor cell. *Nature* **441**, 992-996 (2006).
- 552 12 Rossi, S. W., Jenkinson, W. E., Anderson, G. & Jenkinson, E. J. Clonal analysis reveals a  
553 common progenitor for thymic cortical and medullary epithelium. *Nature* **441**, 988-991  
554 (2006).

- 555 13 Ripen, A. M., Nitta, T., Murata, S., Tanaka, K. & Takahama, Y. Ontogeny of thymic  
556 cortical epithelial cells expressing the thymoproteasome subunit beta5t. *Eur J Immunol* **41**,  
557 1278-1287, doi:10.1002/eji.201041375 (2011).
- 558 14 Shakib, S. *et al.* Checkpoints in the development of thymic cortical epithelial cells. *J*  
559 *Immunol* **182**, 130-137 (2009).
- 560 15 Hamazaki, Y. *et al.* Medullary thymic epithelial cells expressing Aire represent a unique  
561 lineage derived from cells expressing claudin. *Nat Immunol* **8**, 304-311 (2007).
- 562 16 Rodewald, H. R., Paul, S., Haller, C., Bluethmann, H. & Blum, C. Thymus medulla  
563 consisting of epithelial islets each derived from a single progenitor. *Nature* **414**, 763-768,  
564 doi:10.1038/414763a414763a [pii] (2001).
- 565 17 Ulyanchenko, S. *et al.* Identification of a Bipotent Epithelial Progenitor Population in the  
566 Adult Thymus. *Cell Rep* **14**, 2819-2832, doi:10.1016/j.celrep.2016.02.080 (2016).
- 567 18 Nowotschin, S., Xenopoulos, P., Schrode, N. & Hadjantonakis, A. K. A bright single-cell  
568 resolution live imaging reporter of Notch signaling in the mouse. *BMC Dev Biol* **13**, 15,  
569 doi:10.1186/1471-213X-13-15 (2013).
- 570 19 Yang, X. *et al.* Notch activation induces apoptosis in neural progenitor cells through a p53-  
571 dependent pathway. *Dev Biol* **269**, 81-94, doi:10.1016/j.ydbio.2004.01.014 (2004).
- 572 20 Gordon, J. *et al.* Specific expression of lacZ and cre recombinase in fetal thymic epithelial  
573 cells by multiplex gene targeting at the Foxn1 locus. *BMC Dev Biol* **7**, 69, doi:1471-213X-  
574 7-69 [pii]  
575 10.1186/1471-213X-7-69 (2007).
- 576 21 Murtaugh, L. C., Stanger, B. Z., Kwan, K. M. & Melton, D. A. Notch signaling controls  
577 multiple steps of pancreatic differentiation. *Proc Natl Acad Sci U S A* **100**, 14920-14925,  
578 doi:10.1073/pnas.2436557100 (2003).
- 579 22 Klug, D. B. *et al.* Interdependence of cortical thymic epithelial cell differentiation and T-  
580 lineage commitment. *Proc Natl Acad Sci U S A* **95**, 11822-11827 (1998).
- 581 23 Nowell, C. S. *et al.* Foxn1 regulates lineage progression in cortical and medullary thymic  
582 epithelial cells but is dispensable for medullary sublineage divergence. *PLoS Genet* **7**,  
583 e1002348, doi:10.1371/journal.pgen.1002348  
584 PGENETICS-D-11-00078 [pii] (2011).



- 585 24 Gordon, J., Patel, S. R., Mishina, Y. & Manley, N. R. Evidence for an early role for BMP4  
586 signaling in thymus and parathyroid morphogenesis. *Dev Biol* **339**, 141-154, doi:S0012-  
587 1606(09)01442-0 [pii]  
588 10.1016/j.ydbio.2009.12.026 (2010).
- 589 25 Gordon, J., Bennett, A. R., Blackburn, C. C. & Manley, N. R. Gcm2 and Foxn1 mark early  
590 parathyroid- and thymus-specific domains in the developing third pharyngeal pouch. *Mech*  
591 *Dev* **103**, 141-143, doi:S0925477301003331 [pii] (2001).
- 592 26 Chojnowski, J. L., Trau, H. A., Masuda, K. & Manley, N. R. Temporal and spatial  
593 requirements for Hoxa3 in mouse embryonic development. *Dev Biol* **415**, 33-45,  
594 doi:10.1016/j.ydbio.2016.05.010 (2016).
- 595 27 Chen, E. L. Y., Thompson, P. K. & Zuniga-Pflucker, J. C. Regulation of Rbpj expression  
596 reveals a pre-thymic role for Notch in T-cell differentiation **under re-review** (2019).
- 597 28 Liu, Z. *et al.* Second-generation Notch1 activity-trap mouse line (N1IP::CreHI) provides a  
598 more comprehensive map of cells experiencing Notch1 activity. *Development* **142**, 1193-  
599 1202, doi:10.1242/dev.119529 (2015).
- 600 29 Madisen, L. *et al.* A robust and high-throughput Cre reporting and characterization system  
601 for the whole mouse brain. *Nat Neurosci* **13**, 133-140, doi:10.1038/nn.2467 (2010).
- 602 30 Harman, B. C., Jenkinson, E. J. & Anderson, G. Entry into the thymic microenvironment  
603 triggers Notch activation in the earliest migrant T cell progenitors. *J Immunol* **170**, 1299-  
604 1303 (2003).
- 605 31 Ki, S. *et al.* Global transcriptional profiling reveals distinct functions of thymic stromal  
606 subsets and age-related changes during thymic involution. *Cell Rep* **9**, 402-415,  
607 doi:10.1016/j.celrep.2014.08.070 (2014).
- 608 32 Terszowski, G. *et al.* Evidence for a functional second thymus in mice. *Science* **312**, 284-  
609 287, doi:1123497 [pii] 10.1126/science.1123497 (2006).
- 610 33 Hebert, J. M. & McConnell, S. K. Targeting of cre to the Foxg1 (BF-1) locus mediates loxP  
611 recombination in the telencephalon and other developing head structures. *Dev Biol* **222**,  
612 296-306. (2000).

613

## 614 **Acknowledgements**

615 We thank E. Richie for providing the K8 and PLET1 antibodies, and C.C. Blackburn and  
616 E. Richie for reading the manuscript and helpful discussions. We thank J. Nelson in the Center  
617 for Tropical and Emerging Global Diseases Flow Cytometry Facility at the University of  
618 Georgia for flow cytometry and cell sorting technical support. This study was supported by grant  
619 # R21 AI107465 to NM from the National Institutes of Health, and a Canadian Institutes for  
620 Health Research (CIHR) grant (FND-154332) to JCZP. ELYC was supported by an Ontario  
621 Graduate Scholarship, and JCZP is supported by a Canada Research Chair in Developmental  
622 Immunology.

623

### 624 **Author contributions**

625 NM and JCZF designed the experiments; JL, JG, ELYC and LW performed the  
626 experiments and generated the data. All authors participated in data analysis. JG, JL and NM  
627 prepared the manuscript.

628

629

### 630 **Competing financial interests**

631 The authors declare no competing financial interests.

632

### 633 **Figure legends**

#### 634 **Figure 1. Notch1 expression and Notch activity in the fetal thymus. (A,B)**

635 Immunofluorescence of E11.25 (A) and E11.5 (B) wildtype thymus for cleaved NOTCH1 (red)  
636 and FOXN1 (cyan). White arrows in all panels indicate co-expressing cells; red arrows,  
637 NOTCH1<sup>+</sup>;FOXN1<sup>-</sup> cells; dashed line outlines the primordium. (C,D) Immunofluorescence of  
638 E12.5 (C) and E14.5 (D) wildtype thymus for FOXN1 (red) and NOTCH1 (green). (E-H)  
639 Immunofluorescence of E13.5 wild type thymus for NOTCH1 (green), PLET1 (red), and  
640 FOXN1 (magenta). (I) Immunofluorescence of E12.5 CBF:H2B-Venus thymus for expression of  
641 IKAROS (magenta) and GFP (Venus; green). Green arrows, Venus expression in non-  
642 lymphocytes; dashed line outlines the thymus lobe. (J) Immunofluorescence of E12.5 CBF:H2B-  
643 Venus thymus for FOXN1 (magenta) and GFP (Venus; green). (K,L) Immunofluorescence of  
644 E16.5 CBF:H2B-Venus thymus for expression of Venus (green) and CLD3,4 (magenta). Box in  
645 (K) is zoomed area in (L). Scale bars, 50  $\mu$ m. n > 3 for all experiments.

646

647 **Figure 2. Notch1 deletion in TECs results in fewer TEPCs in the fetal thymus. (A-D)**

648 Immunofluorescence of E13.5 (A,B) and E16.5 (C,D) *Foxn1<sup>Cre</sup>;Notch1<sup>fx/fx</sup>* mutant (B,D) and  
649 control (A,C) thymi for CLD3,4 (red) and PLET1 (green). White arrows, PLET1<sup>+</sup>;CLD3,4<sup>-</sup> cells;  
650 cyan arrows, PLET1<sup>-</sup>;CLD3,4<sup>+</sup> cells; yellow arrows, PLET1<sup>+</sup>;CLD3,4<sup>+</sup> cells. (E) Histogram  
651 showing CLD3<sup>+</sup> cells in *Foxn1<sup>Cre</sup>;Notch1<sup>fx/fx</sup>* mutant and control thymi at E17.5. (E,F) Percentage  
652 (F) and total number (G) of CLD3<sup>+</sup> TECs in mutant and control thymi at E17.5. Scale bars, 50  
653  $\mu\text{m}$ . \*\*\* $P \leq 0.001$ , \*\* $P \leq 0.005$ .  $n > 3$  for IHC;  $n = 5$  for flow cytometry.

654

655 **Figure 3. Notch1 deletion from TECs affects mTEC organization and differentiation. (A,B)**

656 Immunofluorescence of E16.5 *Foxn1<sup>Cre</sup>;Notch1<sup>fx/fx</sup>* mutant (B) and control (A) thymus for K5  
657 (red), K8 (green) and UEA1 (magenta). (C,D) Immunofluorescence of E16.5 *Foxn1<sup>Cre</sup>;Notch1<sup>fx/fx</sup>*  
658 mutant (D) and control (C) thymus for AIRE. (E,F) Immunofluorescence of E16.5  
659 *Foxn1<sup>Cre</sup>;Notch1<sup>fx/fx</sup>* mutant (F) and control (E) thymus for K14 (red) and CD205 (green). (G,H)  
660 Immunofluorescence of E16.5 *Foxn1<sup>Cre</sup>;Notch1<sup>fx/fx</sup>* mutant (H) and control (G) thymus for UEA1  
661 (green) and  $\beta 5\text{t}$  (red). (I) Flow cytometry showing histogram (top), percentage (bottom left) and  
662 total number (bottom right) of UEA1<sup>+</sup> cells in *Foxn1<sup>Cre</sup>;Notch1<sup>fx/fx</sup>* mutant and control thymi at  
663 E17.5. (J) Flow cytometric analysis of intrathymic thymocytes from E17.5 *Foxn1<sup>Cre</sup>;Notch1<sup>fx/fx</sup>*  
664 mutant and control thymi stained for CD4, CD8, CD25 and CD44. Top panels show CD4 versus  
665 CD8; bottom panels show DN subsets with CD44 versus CD25. Scale bars, 50  $\mu\text{m}$ . \*\*\* $P \leq$   
666 0.001, \*\* $P \leq 0.005$ .  $n > 3$  for IHC;  $n > 5$  for flow cytometry.

667

668 **Figure 4. Notch1 activation in TECs causes an increase in the number of TEPCs at fetal**

669 **stages. (A-F) Immunofluorescence of E14.5 *Foxn1<sup>Cre</sup>;Rosa<sup>NI-IC</sup> Cre<sup>+</sup>* (D-F) and control (A-C)**  
670 **thymus for K5 (red) and K8 (green). White arrows, K8<sup>+</sup>;K5<sup>-</sup> cells; yellow arrows, K8<sup>+</sup>;K5<sup>+</sup> cells.**  
671 **(G-N) Immunofluorescence of E15.5 control (G-J) and *Foxn1<sup>Cre</sup>;Rosa<sup>NI-IC</sup> Cre<sup>+</sup>* (K-N) thymus**  
672 **for PLET1 (green) and CLD3 (red). Dashed line in (G) and (K) outlines thymus lobe. White**  
673 **arrows, PLET1<sup>+</sup>;CLD3,4<sup>-</sup> cells; red arrows, PLET1<sup>-</sup>;CLD3,4<sup>+</sup> cells; yellow arrows,**  
674 **PLET1<sup>+</sup>;CLD3,4<sup>+</sup> cells (O) Flow cytometric analysis of CLD3 expression in TECs from E15.5**  
675 ***Foxn1<sup>Cre</sup>;Rosa<sup>NI-IC</sup> Cre<sup>+</sup>* and control thymi. (P) Flow cytometric analysis of UEA1 expression in**  
676 **TECs from E15.5 *Foxn1<sup>Cre</sup>;Rosa<sup>NI-IC</sup> Cre<sup>+</sup>* and control thymi. For (O, P), dot plots show one**

677 representative thymus; bar graph shows average values for 3 thymi. (Q-X) Immunofluorescence  
678 of E18.5 control (Q-T) and *Foxn1<sup>Cre</sup>;Rosa<sup>NI-IC</sup> Cre<sup>+</sup>* (U-X) thymus for PLET1 (green), CLD3  
679 (red) and UEA1 (blue). Scale bars, 50 $\mu$ m. \*\*\* $P \leq 0.001$ .  $n > 5$  for IHC;  $n = 3$  for flow  
680 cytometry.

681

682 **Figure 5. Ectopic expression of Notch1 in all TECs blocks fetal TEC differentiation and**  
683 **affects T cell development.** (A,B) Immunofluorescence of E15.5 *Foxn1<sup>Cre</sup>;Rosa<sup>NI-IC</sup> Cre<sup>+</sup>* (B)  
684 and control (A) thymus for K14 (red) and UEA1 (green). (C,D) Immunofluorescence of E15.5  
685 *Foxn1<sup>Cre</sup>;Rosa<sup>NI-IC</sup> Cre<sup>+</sup>* (D) and control (C) thymus for UEA1 (red) and AIRE (green). (E,F)  
686 Immunofluorescence of E18.5 *Foxn1<sup>Cre</sup>;Rosa<sup>NI-IC</sup> Cre<sup>+</sup>* (F) and control (E) thymus for K14 (red)  
687 and UEA1 (green). (G,H) Immunofluorescence of E18.5 *Foxn1<sup>Cre</sup>;Rosa<sup>NI-IC</sup> Cre<sup>+</sup>* (H) and control  
688 (G) thymus for K5 (red) and K8 (green). (I,J) H&E staining of newborn (NB) *Foxn1<sup>Cre</sup>;Rosa<sup>NI-IC</sup>*  
689 *Cre<sup>+</sup>* (J) and control (I) thymus. (K) Flow cytometric analysis of thymocytes from E16.5  
690 *Foxn1<sup>Cre</sup>;Rosa<sup>NI-IC</sup> Cre<sup>+</sup>* and control thymi stained for CD4 and CD8. (L) Flow cytometric  
691 analysis of thymocytes isolated from E16.5 *Foxn1<sup>Cre</sup>;Rosa<sup>NI-IC</sup> Cre<sup>+</sup>* and control thymi stained  
692 for DN subsets using CD44 and CD25. For (K,L), dot plots show one representative thymus for  
693 each genotype; bar graph shows average values for at least 5 thymi. Scale bars, 50  $\mu$ m. \*\*\* $P \leq$   
694 0.001, \*\* $P \leq 0.005$ , \* $P \leq 0.01$ .  $n > 5$  for IHC;  $n > 5$  for flow cytometry.

695

696 **Figure 6. Notch1-deleted TEC are unable to contribute to the mTEC lineage.** (A) Scheme  
697 for generating TECs with mosaic *Notch1* deletion for analysis. Pregnant dams are injected at  
698 E8.5 (8dpf), embryos are collected at E15.5, and the thymus dissected and dissociated into single  
699 cells. (B) Gating for isolation of EpCam+CD45- TECs. (C) Gating for MHCII<sup>lo</sup> and MHCII<sup>hi</sup>  
700 cTEC (UEA-1-) and mTEC (UEA-1+). (D) PCR of genomic DNA with primers specific for the  
701 wild-type undelated and deleted alleles of *Notch1*. Genotypes and cell populations represented  
702 are indicated above each lane.

703

704 **Figure 7. Analysis of the temporal requirement for NOTCH signaling in fetal TEC.** Labels  
705 on the left refer to the entire row; marker names across the top refer to the entire column. In each  
706 row, panels with the same letter are single color or merged versions of the same image. A, A',  
707 A'' and D, D', D''. Control *RBPj<sup>fx/+</sup>;Foxn1<sup>Cre</sup>;Rosa<sup>rtTA</sup>;Tet<sup>on</sup>-RBPj-HA* embryos collected at

708 E16.5 have a wild-type phenotype. B, B', B'' and E, E', E''. Uninduced  
709 RBPj<sup>fx/fx</sup>;Foxn1<sup>Cre</sup>;Rosa<sup>rtTA</sup>;Tet<sup>on</sup>-RBPj-HA (RBPj<sup>ind</sup>) embryos collected at E16 have a TEC-  
710 specific *Rbpj* null phenotype. C, C', C'' and F, F', F''. RBPj<sup>ind</sup> embryos injected with  
711 doxycycline daily from E0-E14 only, collected at E16. G, G', G'' and K, K', K''. Control  
712 embryos collected at newborn (NB) stage. H, H', H'' and L, L', L''. Uninduced RBPj<sup>ind</sup> embryos  
713 collected at NB stage. I, I', I'' and M, M', M''. RBPj<sup>ind</sup> embryos injected with doxycycline daily  
714 from E0-E14 only, collected at NB stage. J, J', J'' and N, N', N''. RBPj<sup>ind</sup> embryos injected with  
715 doxycycline daily from E14-NB only, collected at NB stage. All data in this Figure are  
716 quantified in Figure 8. Scale bars: 100  $\mu$ m

717

718 **Figure 8. Quantification of TEC marker expression in temporal requirement experiments**  
719 (see Figure 7). (A,B) Size and fluorescence intensity of UEA1+ area. (C,D) Size and  
720 fluorescence intensity of CLD3,4+ area. (E) Fluorescence intensity of PLET1+ cells. All  
721 quantification was performed using ImageJ (NIH). \*\*\* $P \leq 0.0001$ , \*\* $P \leq 0.001$ , \* $P \leq 0.005$ ,  
722 \* $P \leq 0.01$ .  $n > 3$ .

723

724 **Figure 9. Notch1 signaling lineage tracing in TEPCs: N1IP::Cre<sup>LO</sup>;tdTomato.** (A-D)  
725 Immunofluorescence of E14.5 N1IP::Cre<sup>LO</sup>;tdTomato;Foxn1::EGFP thymus for expression of  
726 Foxn1::EGFP (green; B), tdTomato (red; C) and UEA1 (blue; D). Dashed line outlines medulla.  
727 Cyan arrows, GFP<sup>+</sup>;tdTomato<sup>+</sup>;UEA1<sup>+</sup> cells; yellow arrows, GFP<sup>+</sup>;tdTomato<sup>-</sup>;UEA1<sup>+</sup> cells. (E)  
728 Flow cytometric analysis of newborn N1IP::Cre<sup>LO</sup>;tdTomato thymus stained for EpCam, UEA1  
729 and MHCII, showing percentage of UEA1<sup>+</sup>;MHCII<sup>hi</sup> mTECs and UEA1<sup>-</sup>;MHCII<sup>hi</sup> cTECs that  
730 express the N1IP::Cre<sup>LO</sup>;tdTomato reporter. (F) Flow cytometric analysis of newborn  
731 N1IP::Cre<sup>LO</sup>;tdTomato;Foxn1::EGFP thymus stained for EpCam and MHCII showing  
732 Foxn1::EGFP levels in the EpCam<sup>+</sup>;N1IP::Cre<sup>LO</sup>;tdTomato<sup>+</sup> and  
733 EpCam<sup>+</sup>;N1IP::Cre<sup>LO</sup>;tdTomato<sup>-</sup> TEC populations. (G-J) Immunofluorescence of E14.5  
734 N1IP::Cre<sup>LO</sup>;tdTomato;Foxn1::EGFP thymus for Foxn1::EGFP (green; H), tdTomato (red; I) and  
735 Plet1 (blue; J). White arrows, GFP<sup>+</sup>;tdTomato<sup>-</sup>;PLET1<sup>+</sup> TEPCs; yellow arrows,  
736 GFP<sup>+</sup>;tdTomato<sup>+</sup>;PLET1<sup>-</sup> TECs. (K-N) Immunofluorescence of E14.5 N1IP::Cre<sup>LO</sup>;tdTomato  
737 thymus for CLD3,4 (green; L), tdTomato (red; M) and CD31 (blue; N). White arrows, CLD3,4<sup>-</sup>  
738 ;tdTomato<sup>-</sup>;CD31<sup>+</sup> endothelial cells; yellow arrows, CLD3,4<sup>+</sup>;tdTomato<sup>+</sup>;CD31<sup>-</sup> mTEPCs. (O-R)

739 Immunofluorescence of E14.5 N1IP::Cre<sup>LO</sup>;tdTomato;Foxn1::EGFP thymus for Foxn1::EGFP  
740 (green; P), tdTomato (red; Q) and PDGFR- $\beta$  (blue; R). White arrows, GFP<sup>-</sup>;tdTomato<sup>+</sup>;PDGFR-  
741  $\beta$ <sup>+</sup> pericytes; yellow arrows, GFP<sup>+</sup>;tdTomato<sup>+</sup>;PDGFR- $\beta$ <sup>-</sup> TECs. Scale bars, 50  $\mu$ m. C, cortex. M,  
742 medulla. n > 3 for IHC; n > 5 for flow cytometry.

743

744 **Figure 10. Notch1 signaling lineage tracing in TEPCs: N1IP::Cre<sup>HI</sup>;tdTomato.** (A-D)

745 Immunofluorescence of E14.5 N1IP::Cre<sup>HI</sup>;tdTomato;Foxn1::EGFP thymus for expression of  
746 Foxn1::EGFP (green; B), tdTomato (red; C) and UEA1 (blue; D). White arrows,  
747 GFP<sup>+</sup>;tdTomato<sup>+</sup>;UEA1<sup>-</sup> cTECs; yellow arrow, GFP<sup>+</sup>;tdTomato<sup>+</sup>;UEA1<sup>-</sup> cell at the cortico-  
748 medullary junction; cyan arrows, GFP<sup>+</sup>;tdTomato<sup>+</sup>;UEA1<sup>+</sup> mTECs. Dashed line outlines  
749 medulla. (E-H) Immunofluorescence of E14.5 N1IP::Cre<sup>HI</sup>;tdTomato;Foxn1::EGFP thymus for ,  
750 Foxn1::EGFP (green; I), tdTomato (red; J) and Cld3,4 (blue; K). Arrows,  
751 GFP<sup>+</sup>;tdTomato<sup>+</sup>;CLD3,4<sup>+</sup> cells. (I-L) Immunofluorescence of E14.5  
752 N1IP::Cre<sup>HI</sup>;tdTomato;Foxn1::EGFP thymus for , Foxn1::EGFP (green; M), tdTomato (red; N)  
753 and PLET1 (blue; O). Arrows, GFP<sup>+</sup>;tdTomato<sup>+</sup>;PLET1<sup>+</sup> cells. (M) Flow cytometric analysis of  
754 newborn N1IP::Cre<sup>HI</sup>;tdTomato;Foxn1::EGFP thymus stained for EpCam, UEA1 and MHCII  
755 showing percentage of UEA1<sup>+</sup> mTECs and UEA1<sup>-</sup> cTECs that express the N1IP::Cre<sup>HI</sup>;tdTomato  
756 reporter. Lower plots show Foxn1::EGFP expression levels in UEA1<sup>+</sup>;tdTomato<sup>+</sup> cTECs and  
757 UEA1<sup>-</sup>;tdTomato<sup>-</sup> cTECs. (N,O) Immunofluorescence of E16.5 CBF:H2B-Venus thymus for ,  
758 FOXN1 (red) and UEA1 (magenta). Yellow arrow, Venus<sup>+</sup>; FOXN1<sup>+</sup>; UEA1<sup>-</sup> TEC at the  
759 cortico-medullary junction; white arrow, Venus<sup>+</sup>; FOXN1<sup>+</sup>; UEA1<sup>-</sup> TEC in the cortex; cyan  
760 arrows, Venus<sup>+</sup>; FOXN1<sup>+</sup>; UEA1<sup>+</sup> mTECs. Box in (N) is zoomed area in (O). Dashed line  
761 outlines medulla. Scale bars, 50 $\mu$ m. C, cortex. M, medulla. n > 3 for IHC; n > 5 for flow  
762 cytometry.

763

764 **Figure 11. Model for the role of Notch1 signaling during fetal TEC development.** In this

765 model, all fetal TECs derive from a common PLET1<sup>+</sup>;CLD3,4<sup>+</sup> progenitor pool that will then  
766 become lineage-restricted into either mTEPCs or cTEPCs. While the bipotent progenitor itself  
767 does not experience NOTCH signaling, immediate progeny that experience low levels of  
768 NOTCH signaling down regulate PLET-1 and up regulate CLD3,4, committing to the mTEC  
769 lineage; these mTEPCs then experience high levels of NOTCH signaling to drive initial



770 expansion and differentiation. *Notch1* expression must then be down regulated in those cells for  
771 mTEC differentiation to proceed functional AIRE<sup>+</sup> mTECs. The progeny of PLET1<sup>+</sup> cells that do  
772 not receive a NOTCH1 signal will down regulate CLD3,4 expression and progress to the cTEC  
773 lineage. At some point during their differentiation, a separate exposure to low NOTCH signaling  
774 results in up-regulation of *Foxn1*, presumably leading to cTEC maturation. It is also possible that  
775 the cTEC lineage splits into two different functional populations depending on exposure to low  
776 level NOTCH signaling (dotted arrow); in the absence of more cTEC markers and functional  
777 information, these two possibilities cannot be distinguished.

778

779 **Figure S1. Fewer TEPCs in the *Foxg1*<sup>Cre</sup>;*Notch1*<sup>fx/fx</sup> fetal thymus.** Immunofluorescence of  
780 E14.5 (A,B) and E18.5 (C,D) *Foxg1*<sup>Cre</sup>;*Notch1*<sup>fx/fx</sup> mutant (B,D) and control (A,C) thymus for  
781 expression of CLD3,4 (red), PLET1 (green) and UEA1 (blue). Scale bars, 50  $\mu$ m. n > 3.

782

783 **Figure S2. TEC organization and differentiation are affected in the *Foxg1*<sup>Cre</sup>;*Notch1*<sup>fx/fx</sup>**  
784 **fetal thymus.** (A,B) Immunofluorescence of E12.5 *Foxg1*<sup>Cre</sup>;*Notch1*<sup>fx/fx</sup> mutant (B) and control  
785 (A) thymus for expression of K5 (red), K8 (green) and UEA1 (blue). (C,D) Immunofluorescence  
786 of E18.5 *Foxg1*<sup>Cre</sup>;*Notch1*<sup>fx/fx</sup> mutant (D) and control (C) thymus for expression of K5 (red), K8  
787 (green). (E,F) Immunofluorescence of E18.5 *Foxg1*<sup>Cre</sup>;*Notch1*<sup>fx/fx</sup> mutant (F) and control (E)  
788 thymus for expression of AIRE. (G) Flow cytometric analysis of intrathymic thymocytes isolated  
789 from E18.5 *Foxg1*<sup>Cre</sup>;*Notch1*<sup>fx/fx</sup> mutant and control thymi stained for CD4, CD8, CD44 and  
790 CD25 subsets. Scale bars, 50  $\mu$ m. n > 3 for IHC; n > 5 for flow cytometry.

791

792 **Figure S3. Gating controls for flow cytometric analysis of thymic cells isolated from**  
793 **newborn N1IP::Cre<sup>LO</sup>;tdTomato;Foxn1::EGFP and N1IP::Cre<sup>HI</sup>;tdTomato;Foxn1::EGFP**  
794 **mice.** Cells were divided into FOXN1 high, low, and very low/negative for the analyses shown  
795 in Figures 6 and 7 based on these gates.

796

797 **Figure S4. Restoring NOTCH signaling receptivity in TECs rescues mTEPC generation.**  
798 (A-D) Immunofluorescence of E16 (A-C) or NB (D-G) thymi collected from controls  
799 RBPj<sup>fx/+</sup>;Foxn1<sup>Cre</sup>;Rosa<sup>rtTA</sup>;Tet<sup>on</sup>-RBPj-HA (A, D), uninduced RBPj<sup>fx/fx</sup>;Foxn1<sup>Cre</sup>;Rosa<sup>rtTA</sup>;Tet<sup>on</sup>-  
800 RBPj-HA (RBPJ<sup>ind</sup>) (B, E), or RBPJ<sup>ind</sup> mice injected with doxycycline from E0-14 (C, F) or from

801 E14-NB (G), as in Figure 7. Thymi are stained for expression of CLD3,4 (red) and PLET1  
802 (green). White arrows indicate PLET1<sup>+</sup>;CLD3,4<sup>-</sup> cells; cyan arrows indicate PLET1<sup>-</sup>;CLD3,4<sup>+</sup>  
803 cells; yellow arrows indicate PLET1<sup>+</sup>;CLD3,4<sup>+</sup> cells. Compare with Figure 2. Scale bars: 50 μm.



# Figure 1

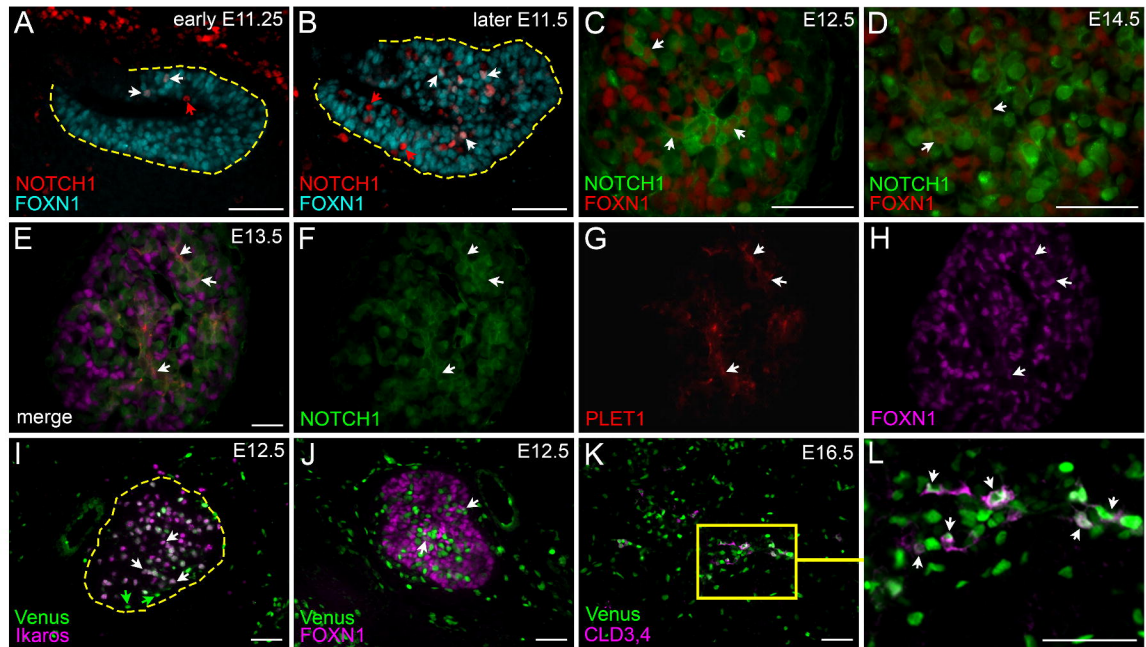



# Figure 2

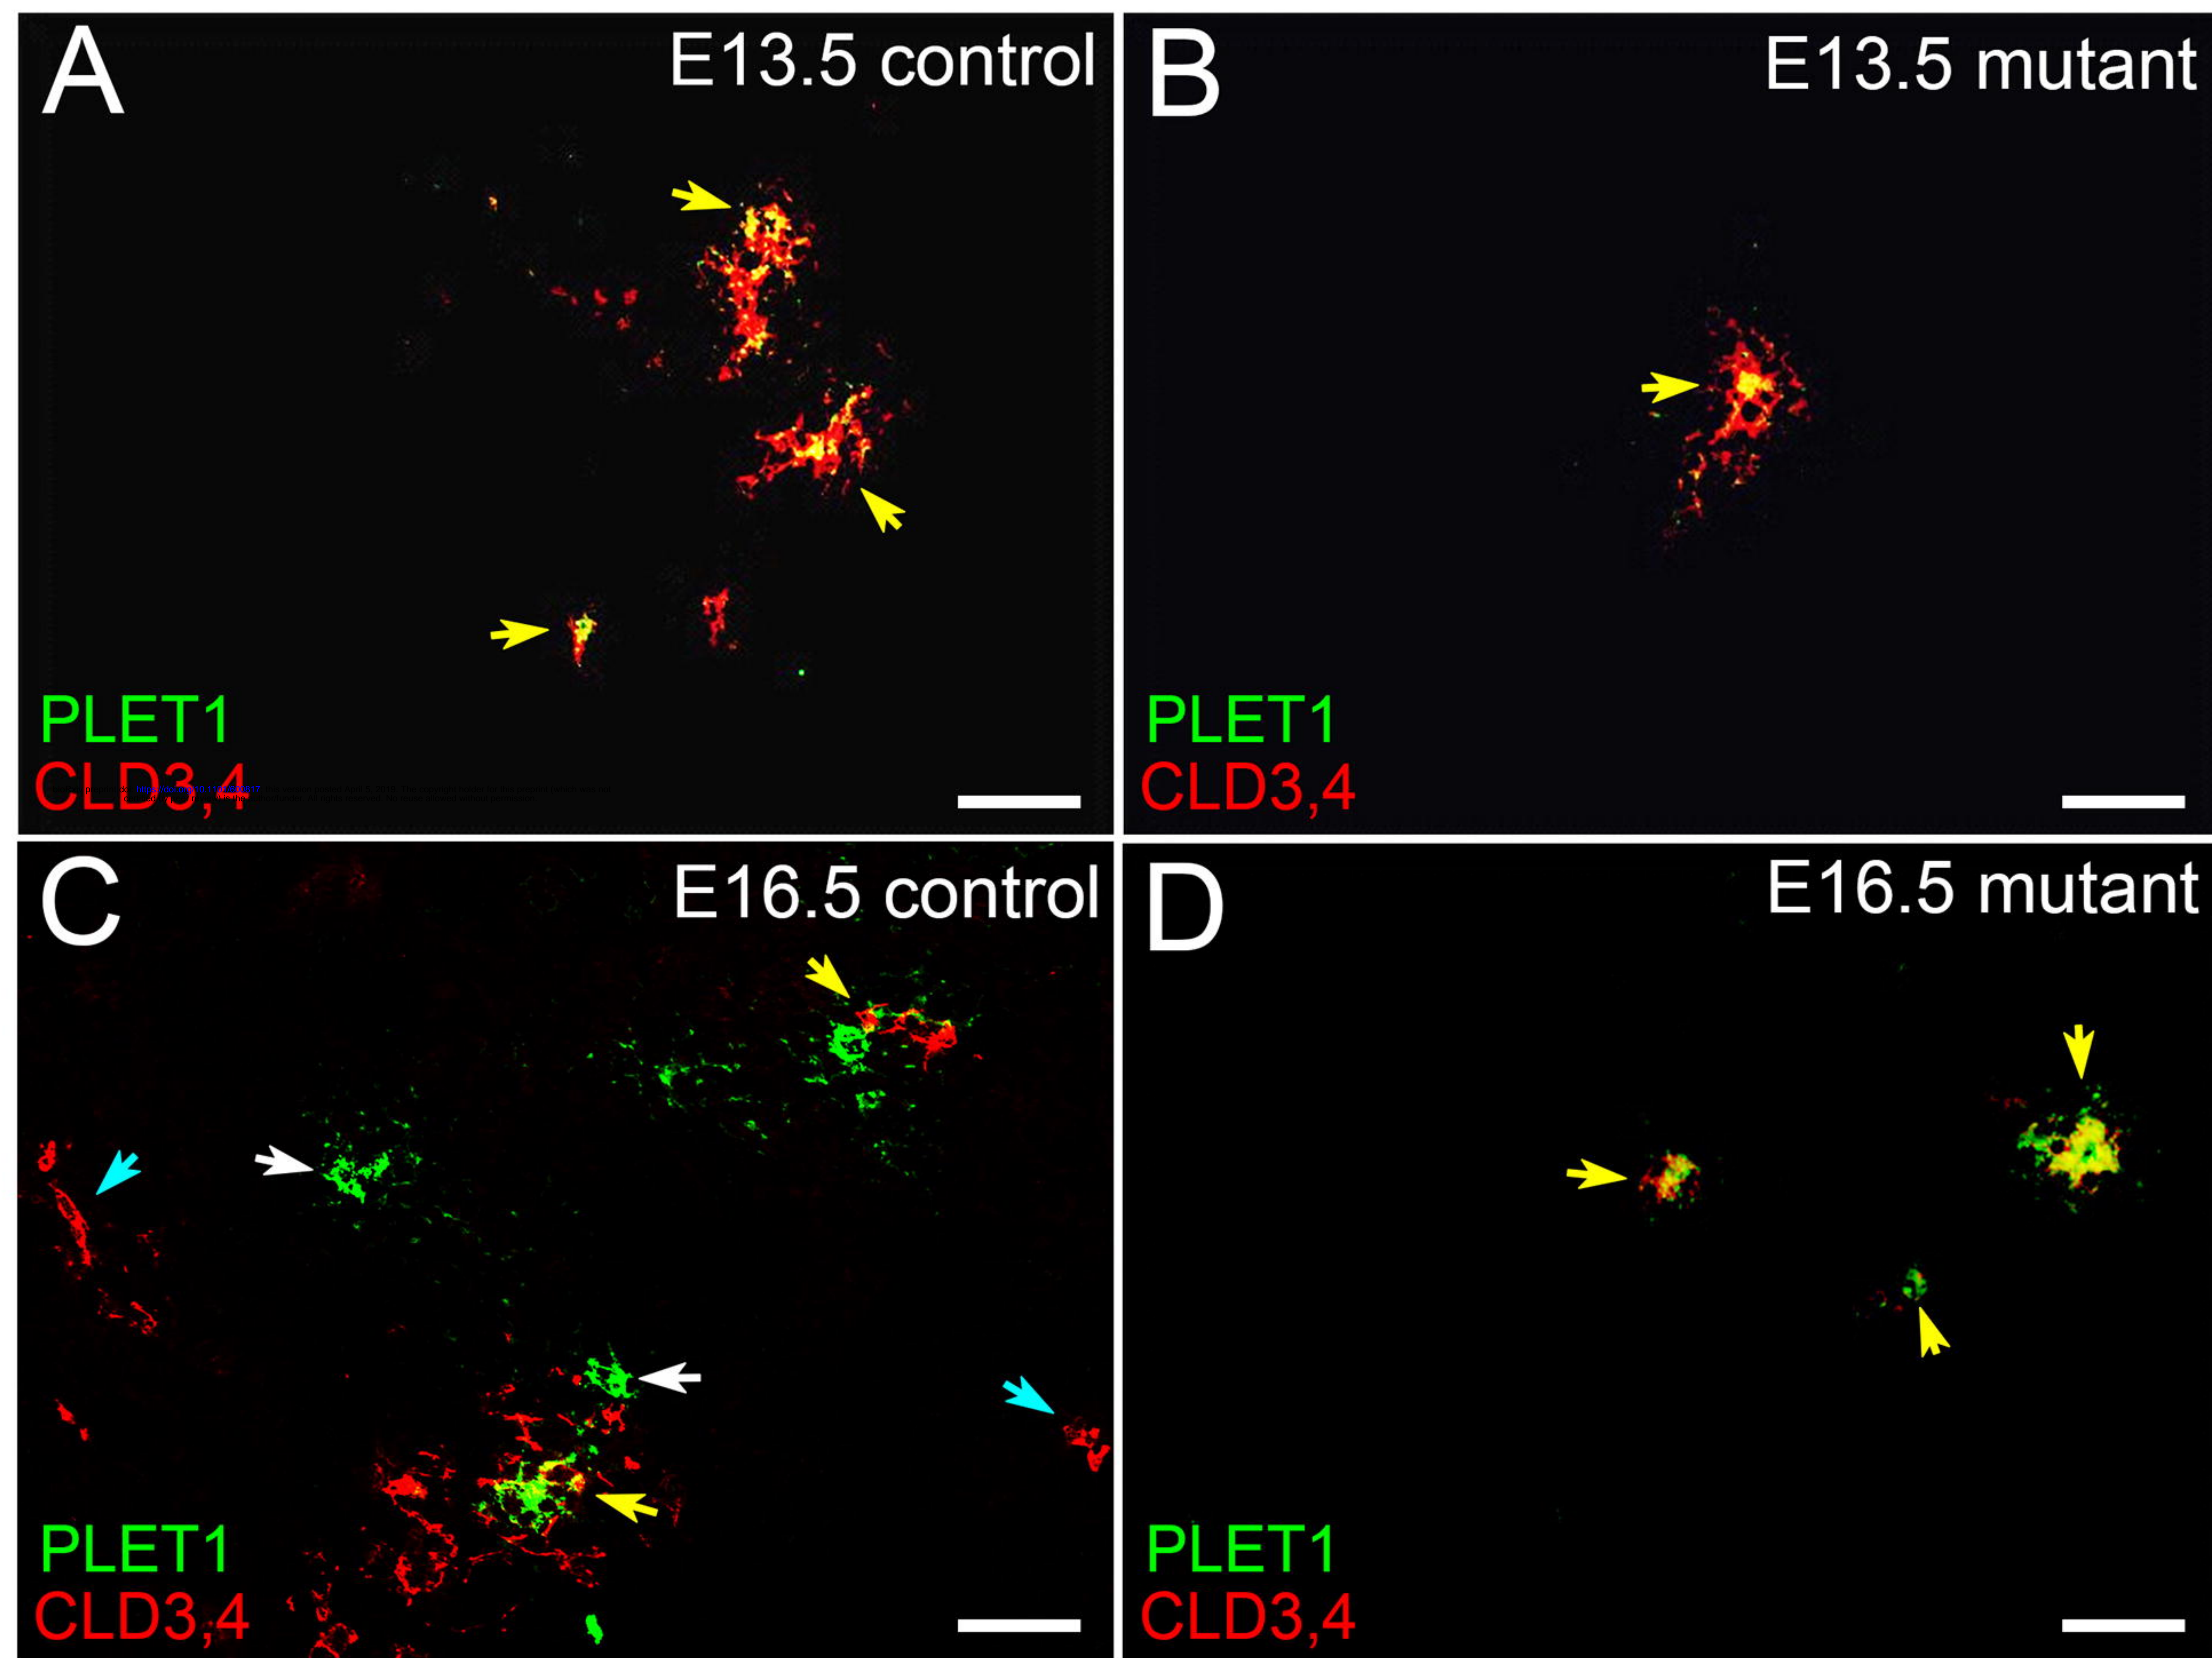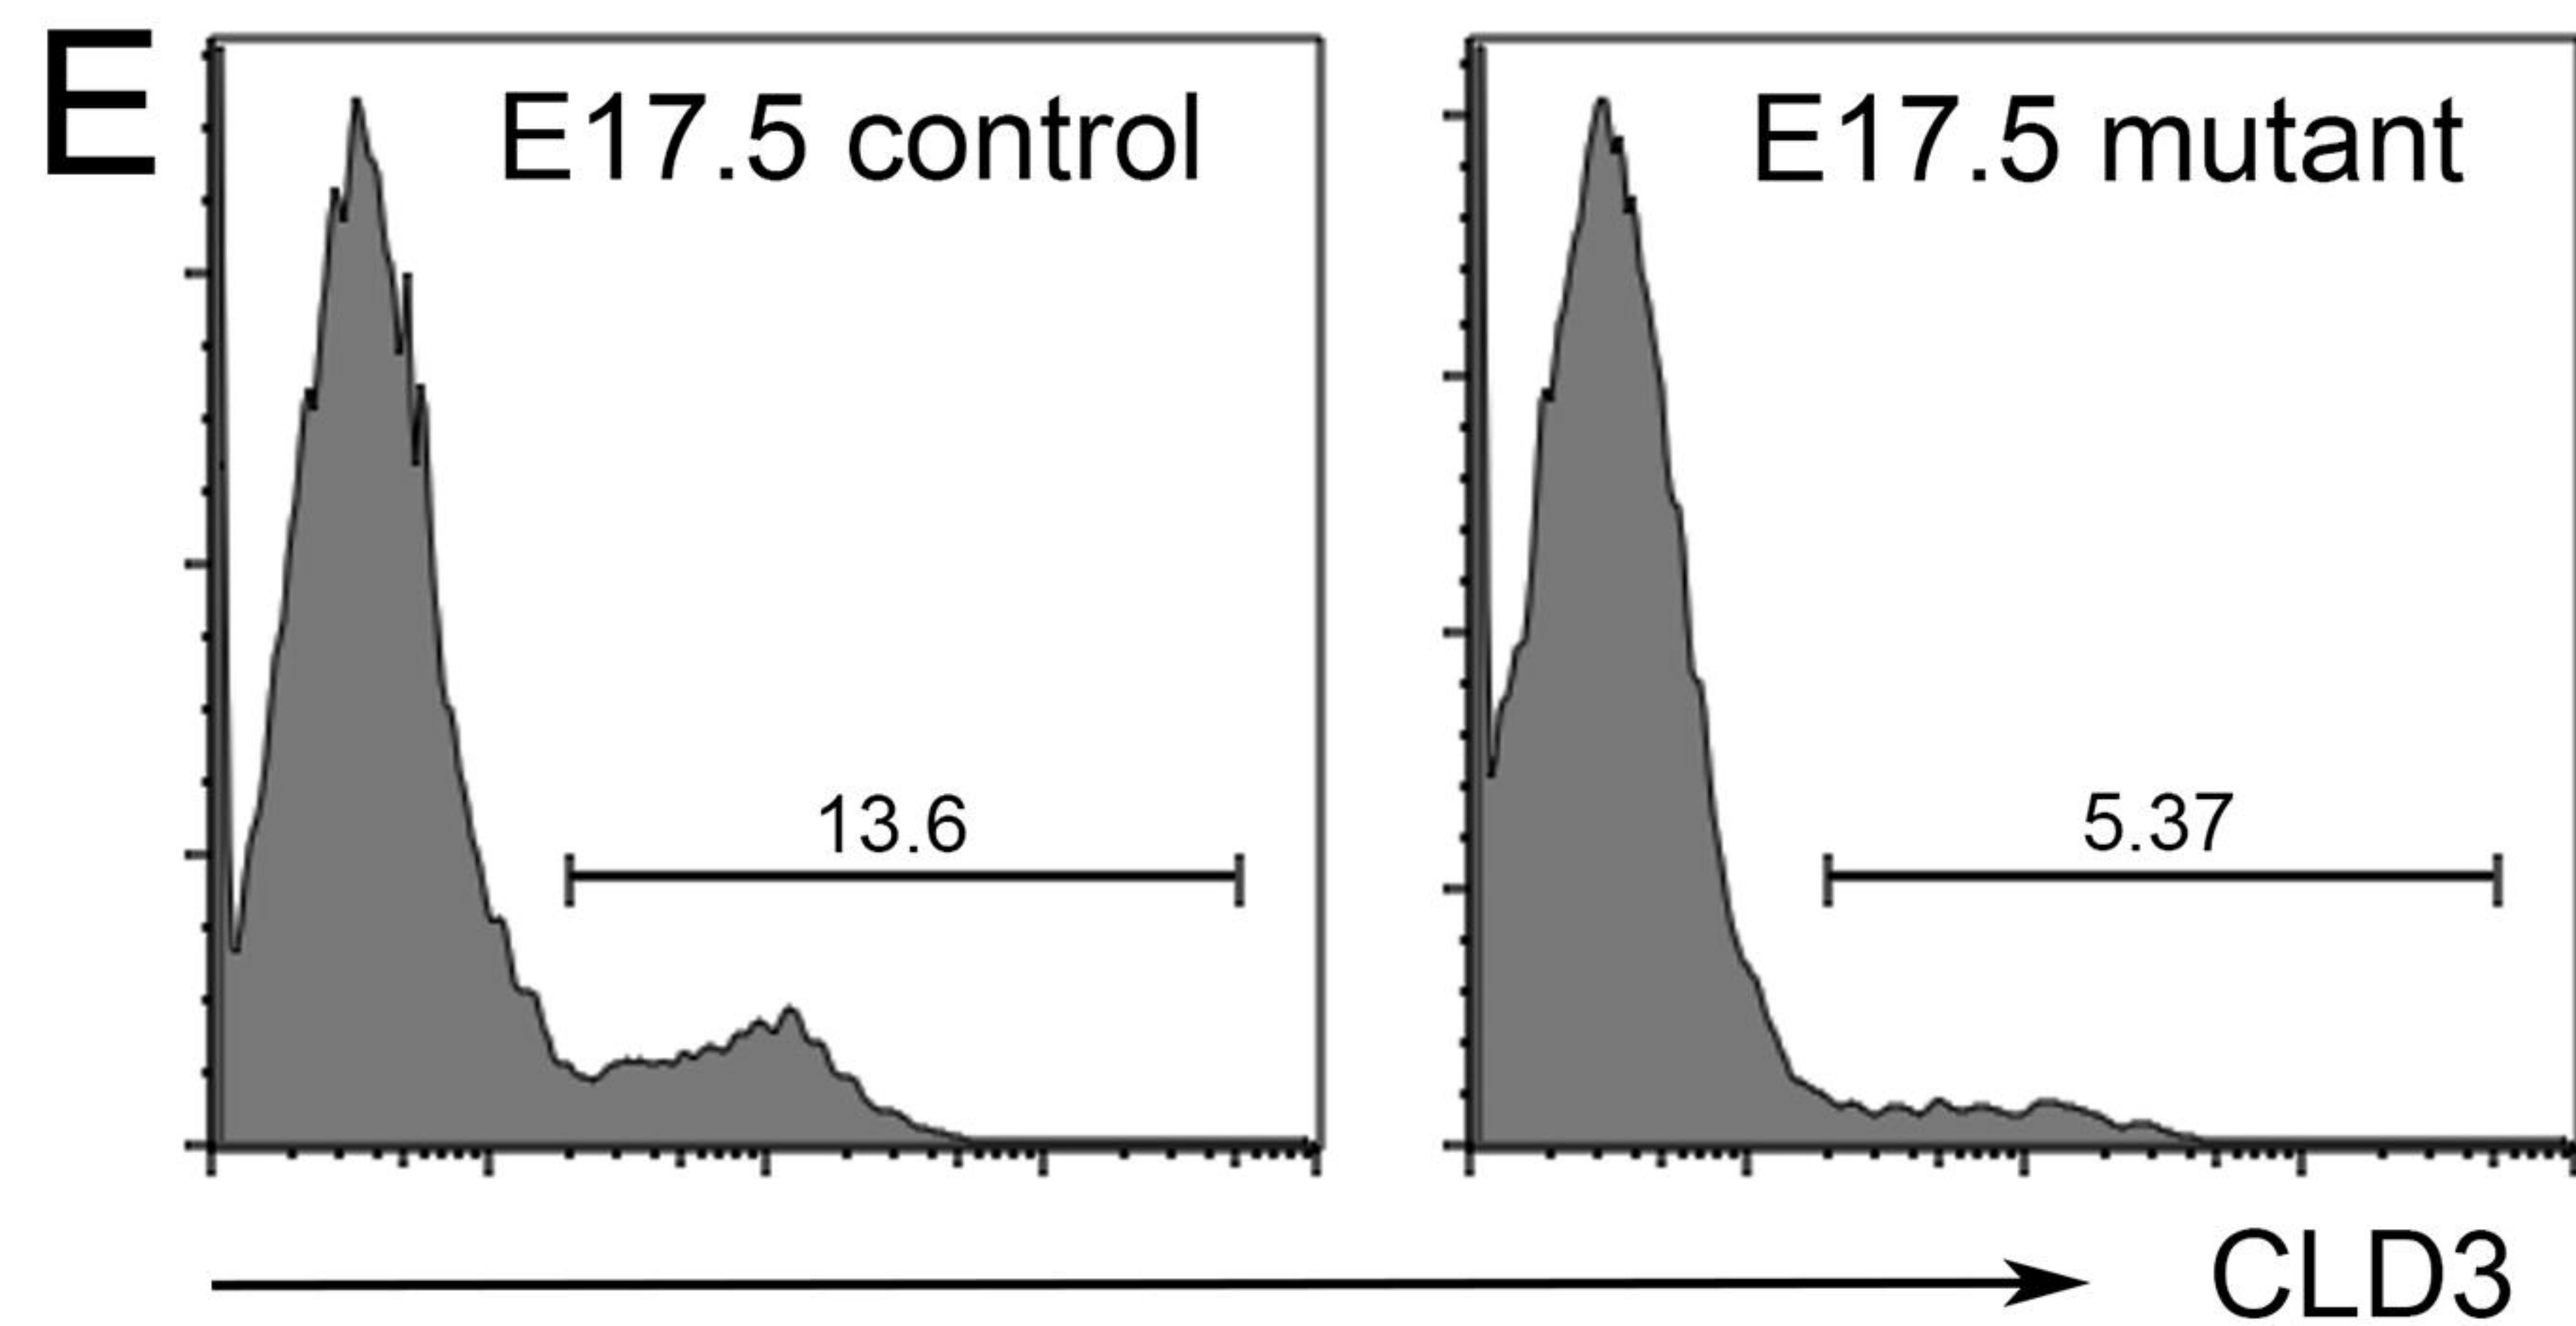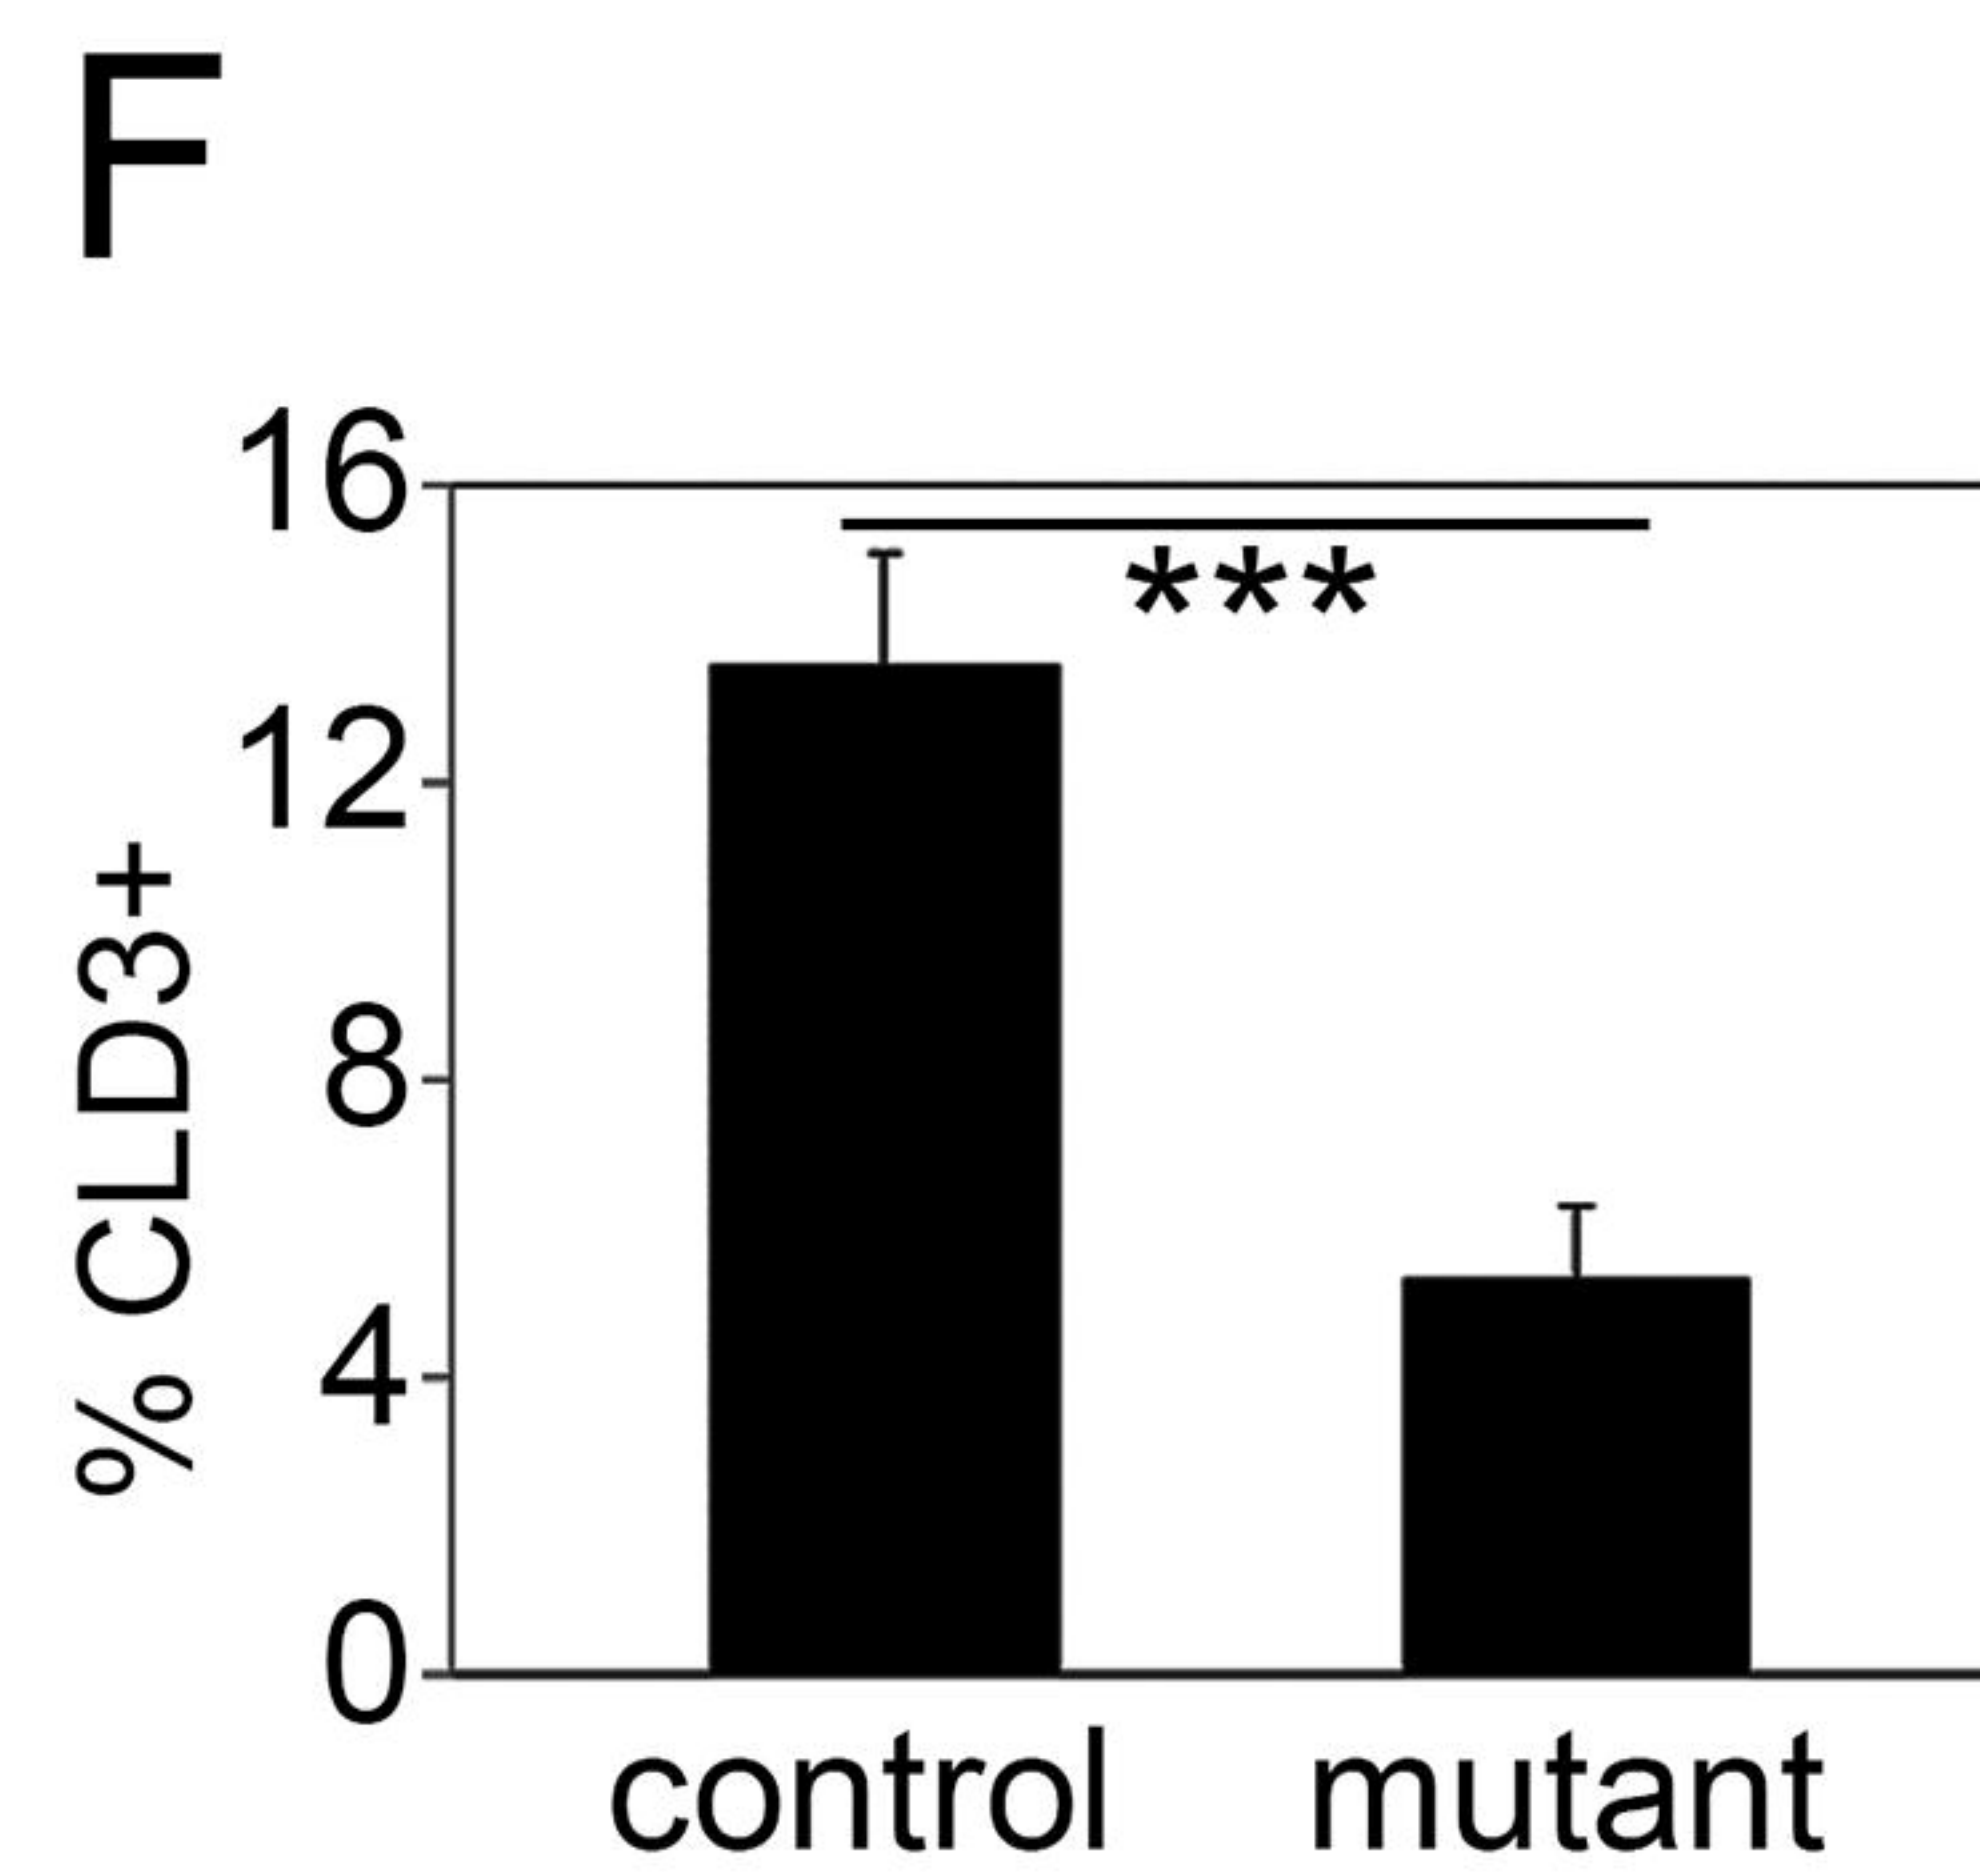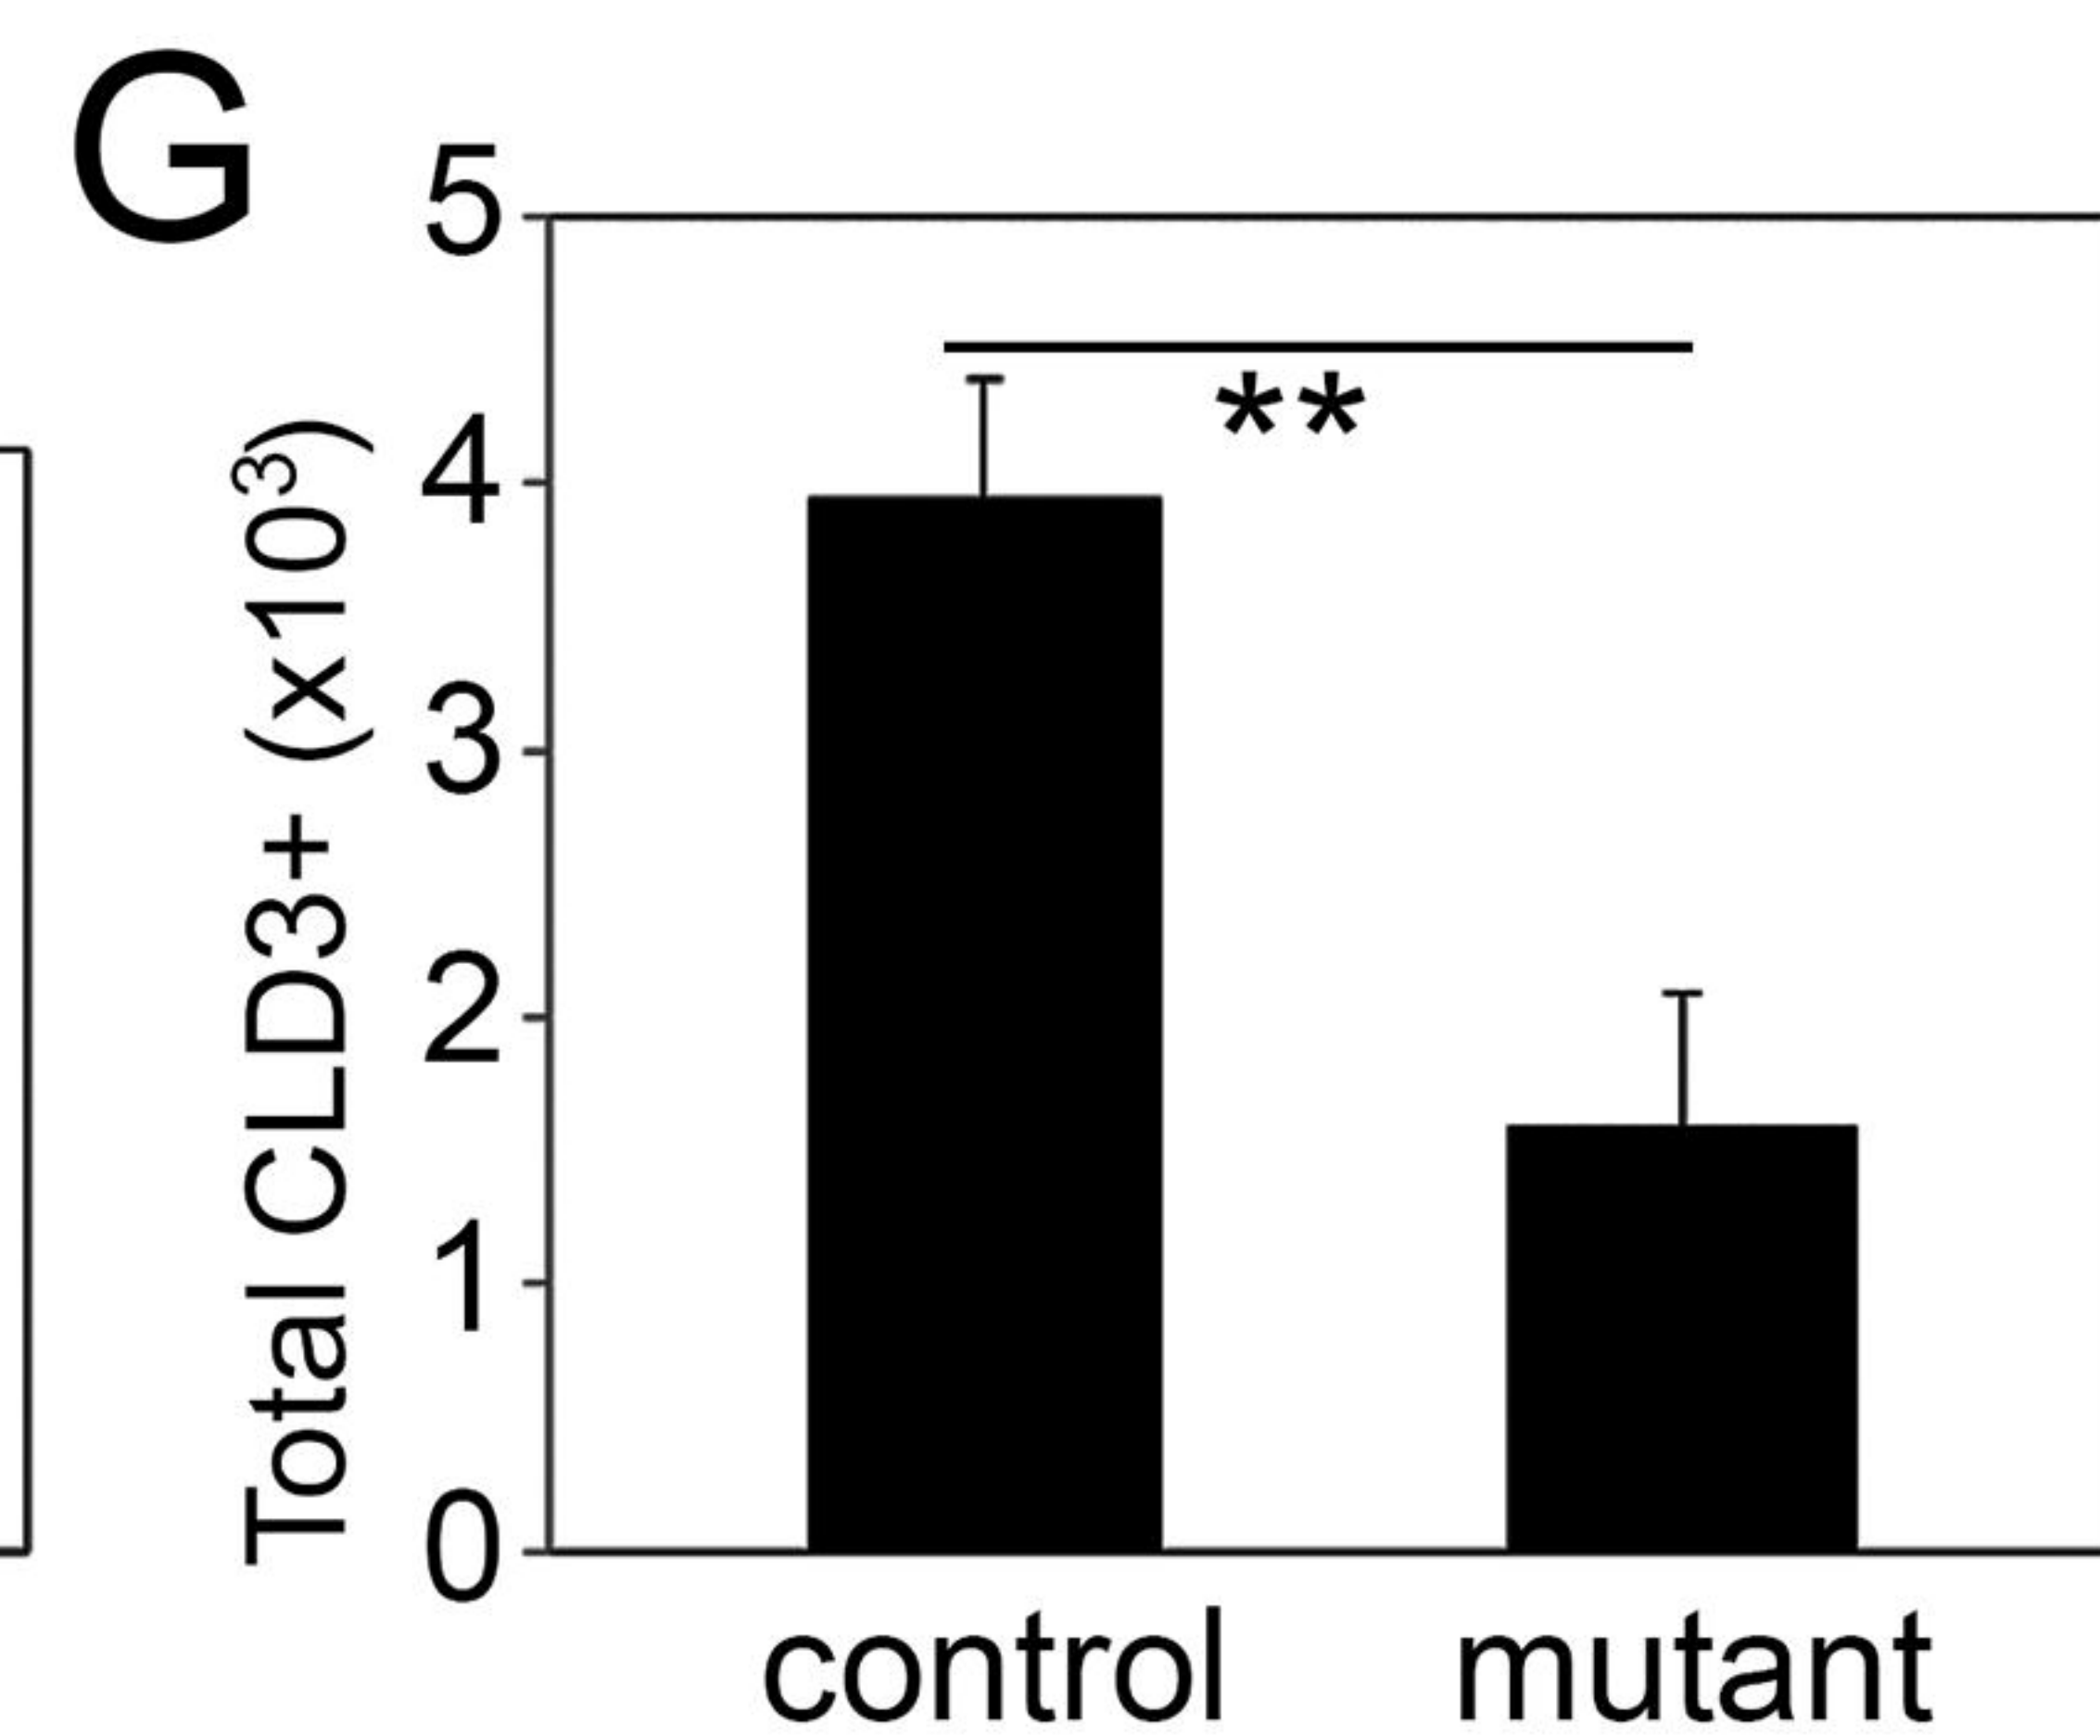



# Figure 3

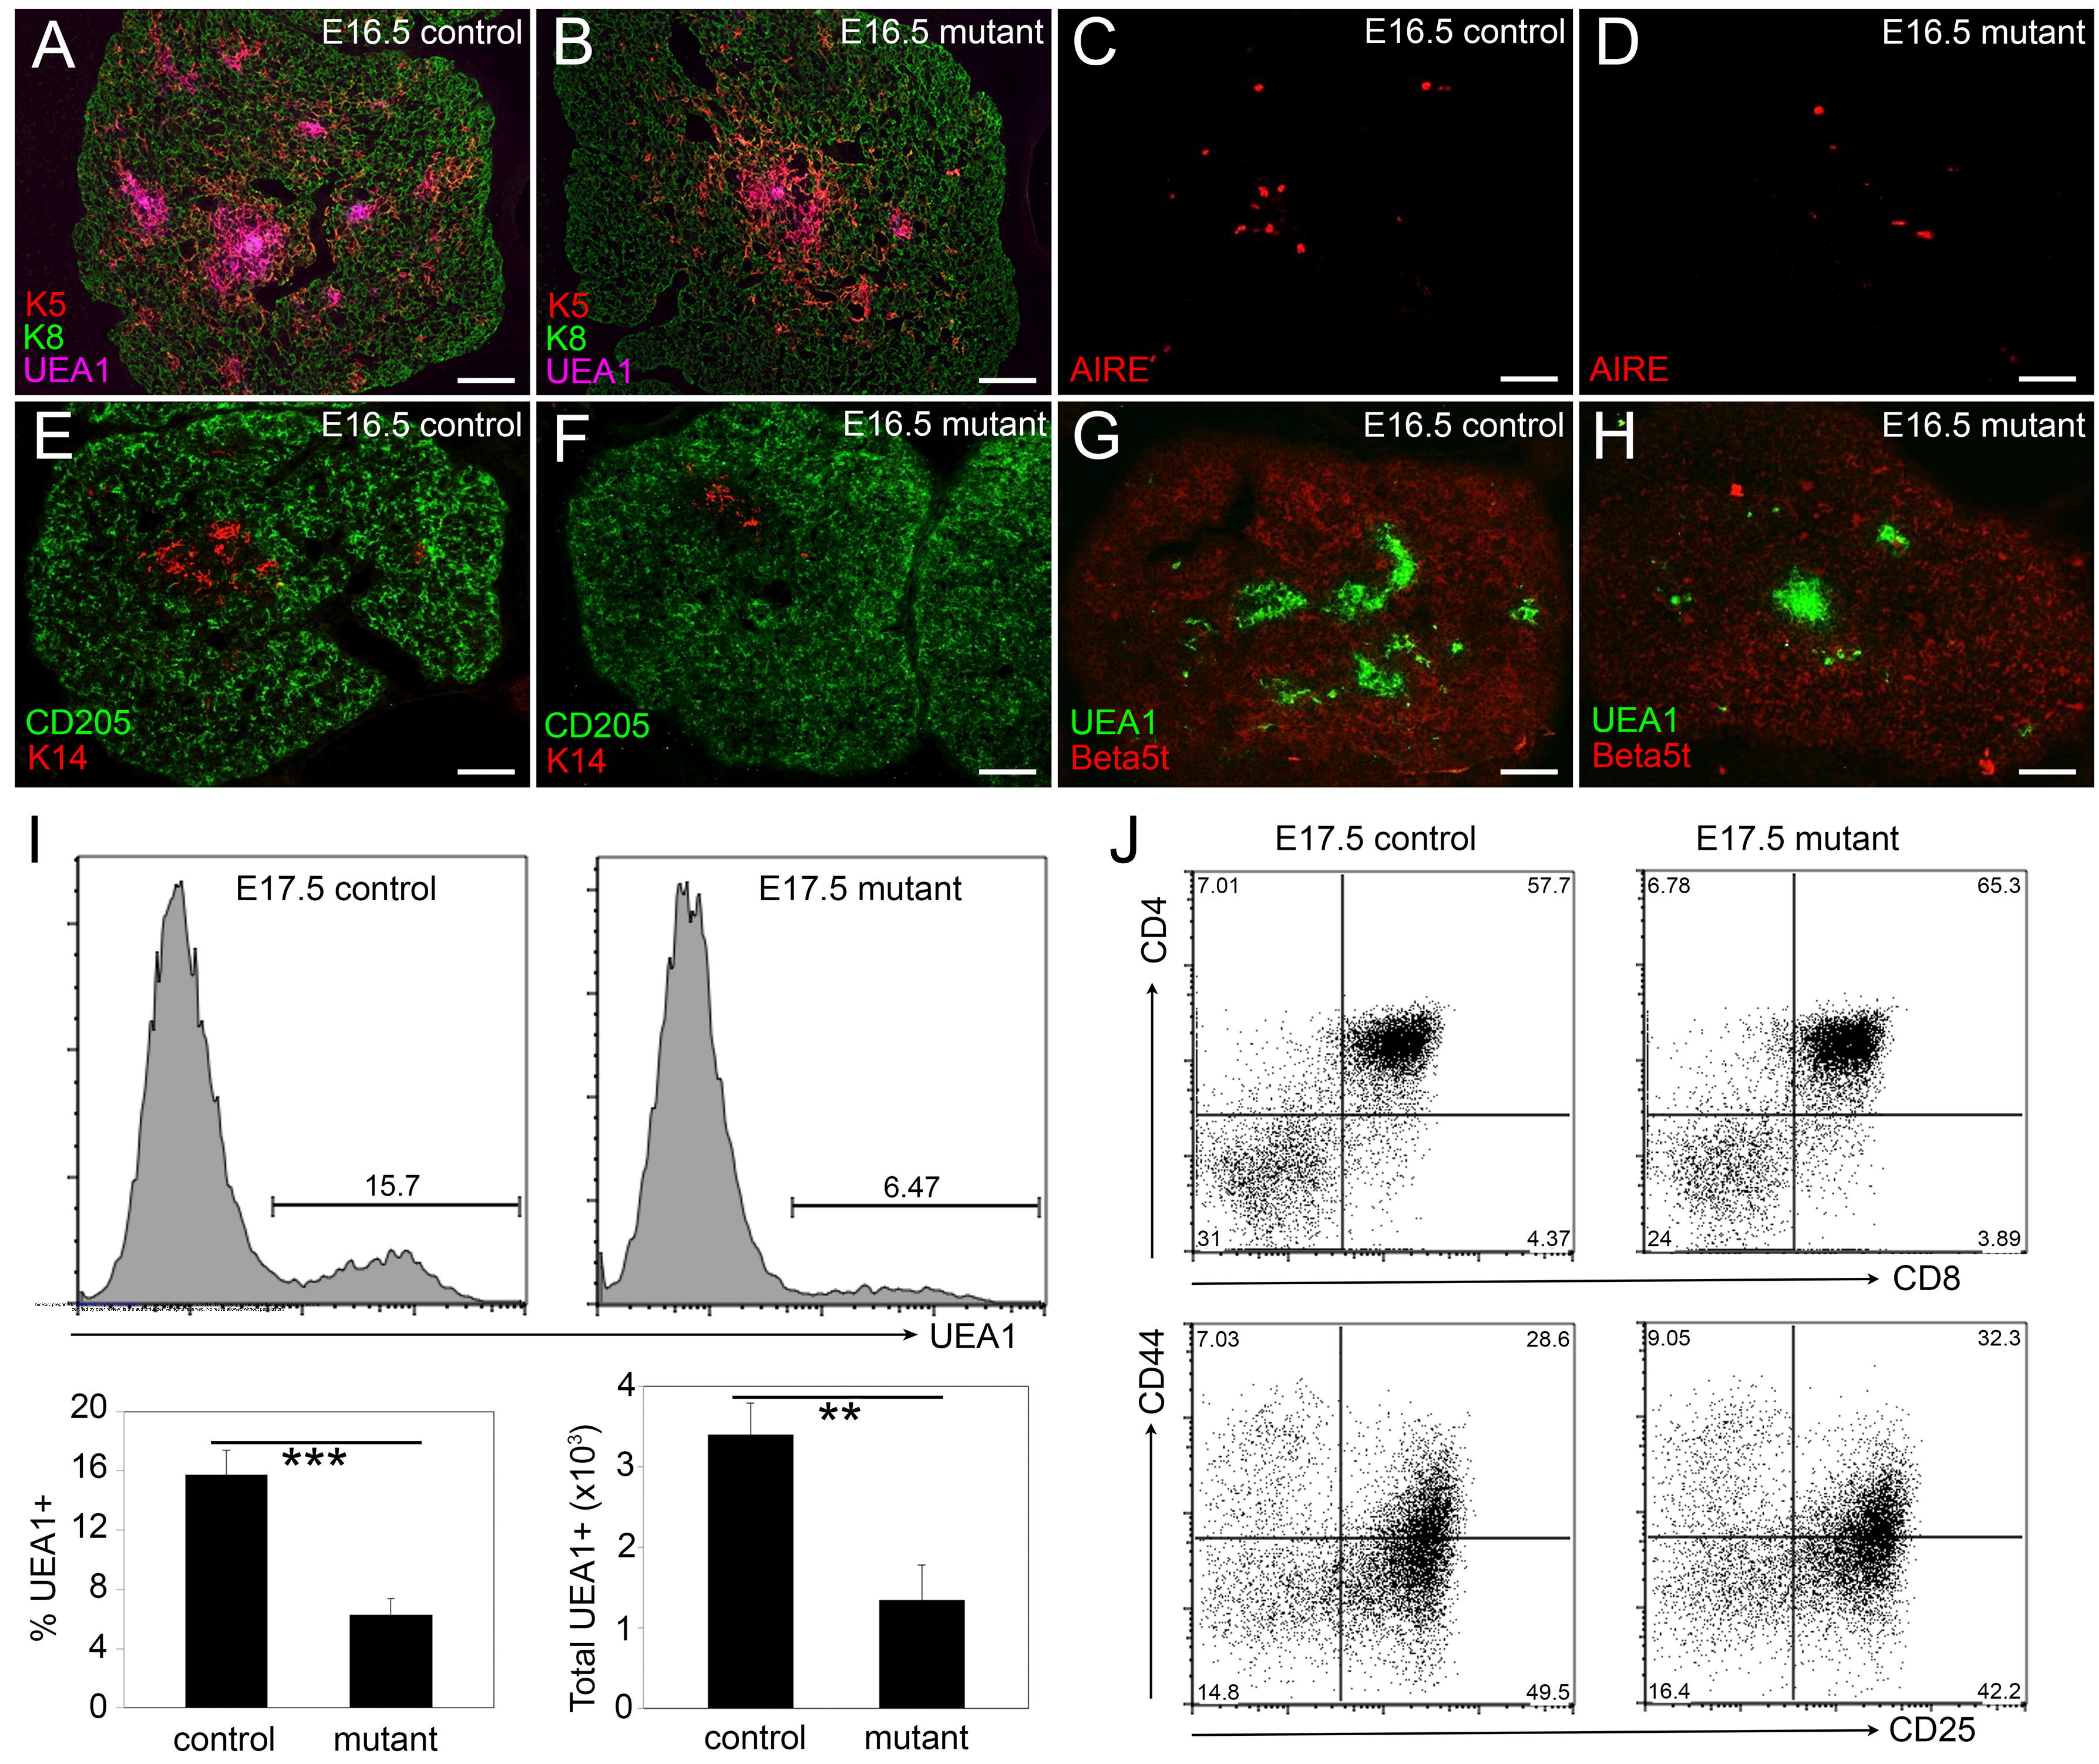



**Figure 4**

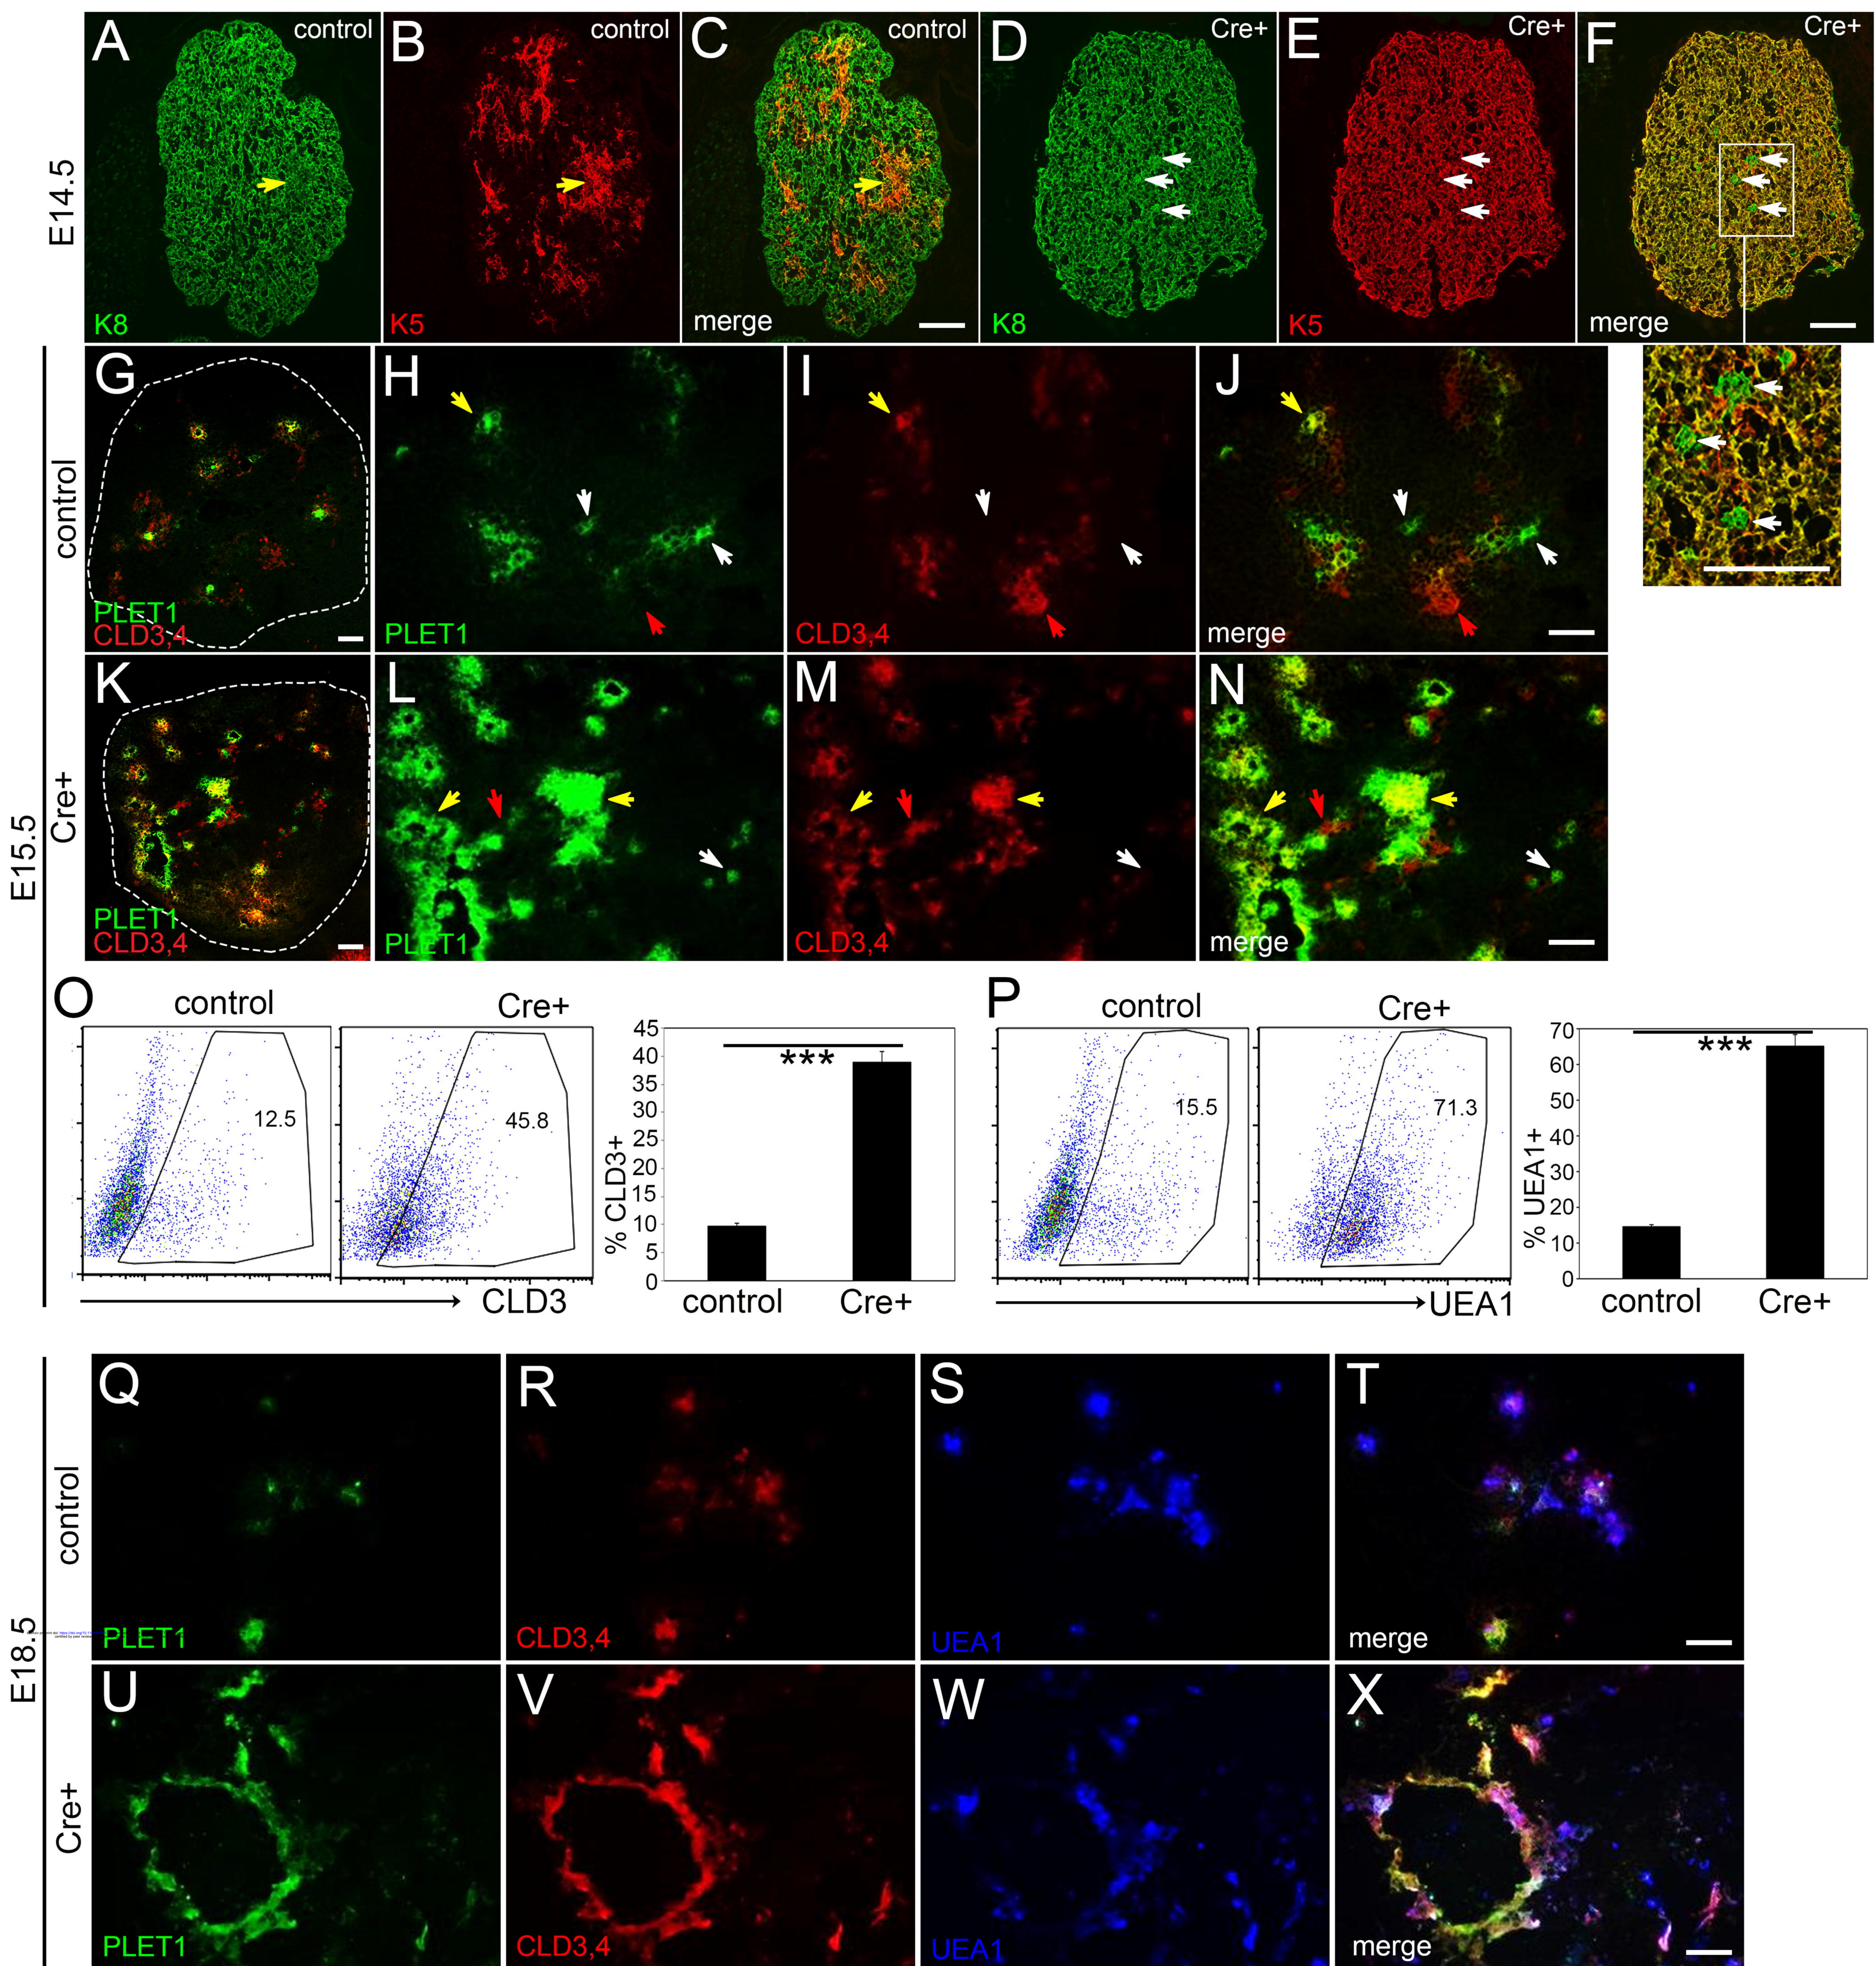



# Figure 5

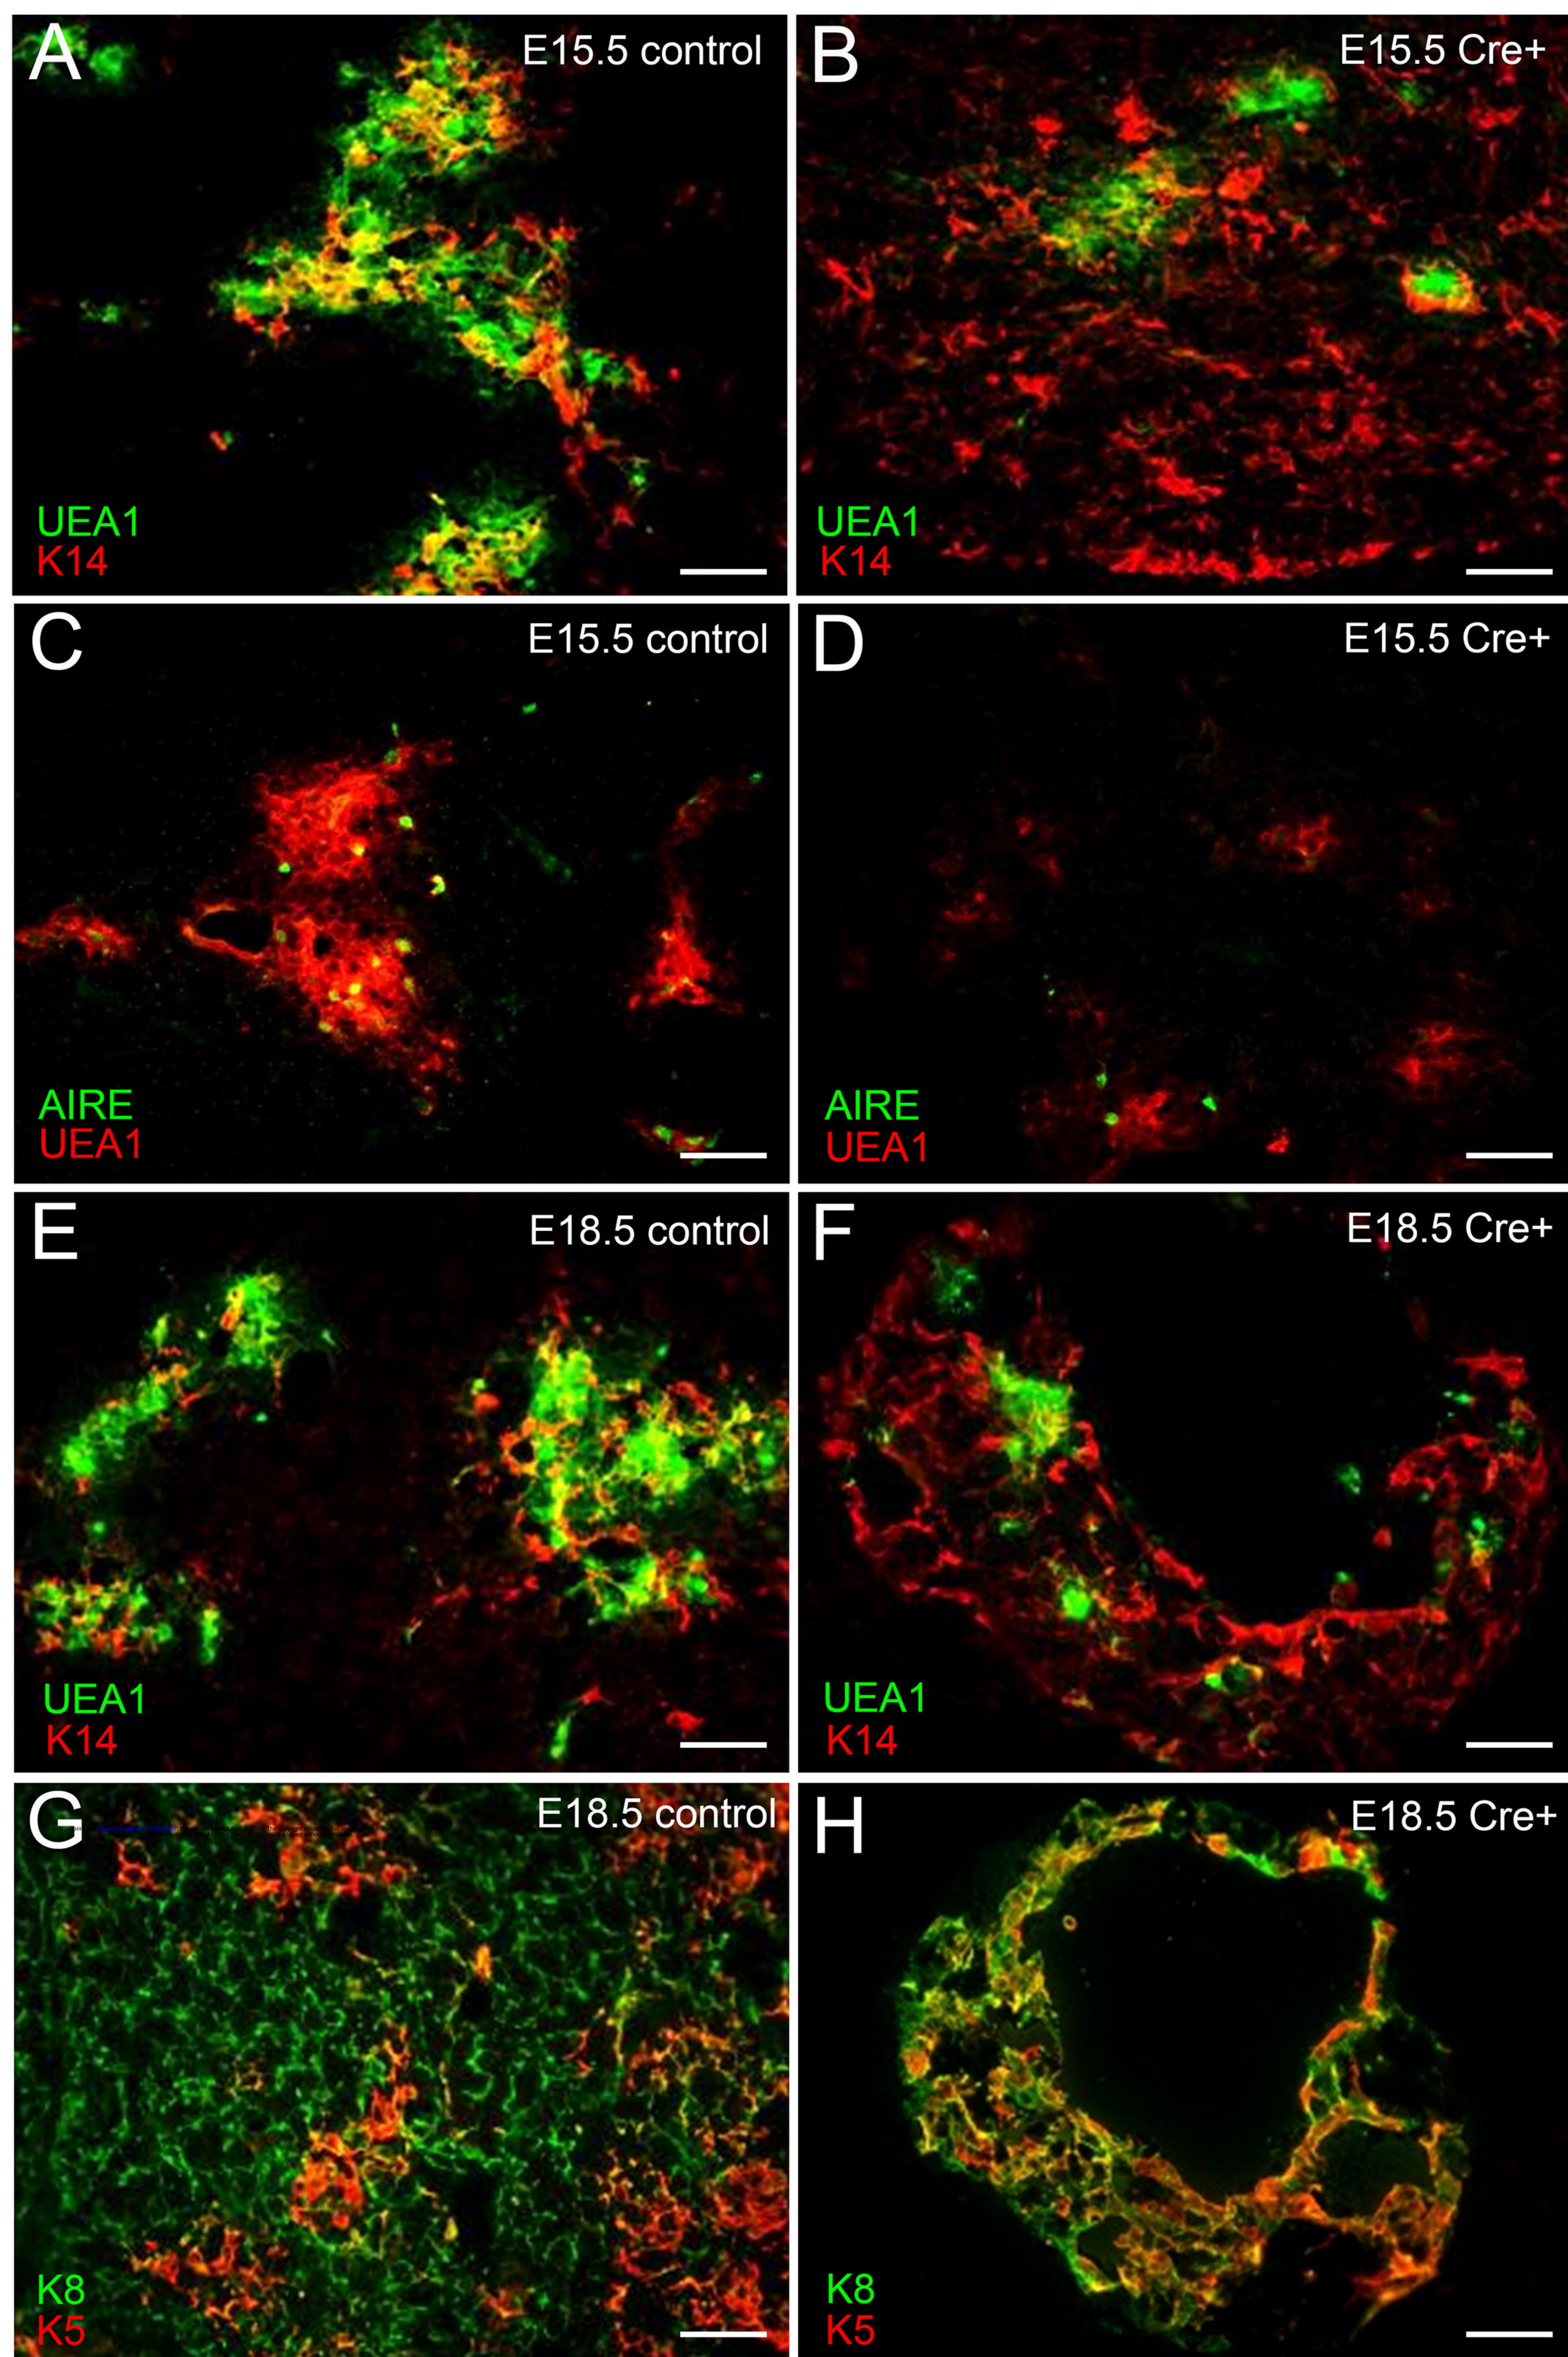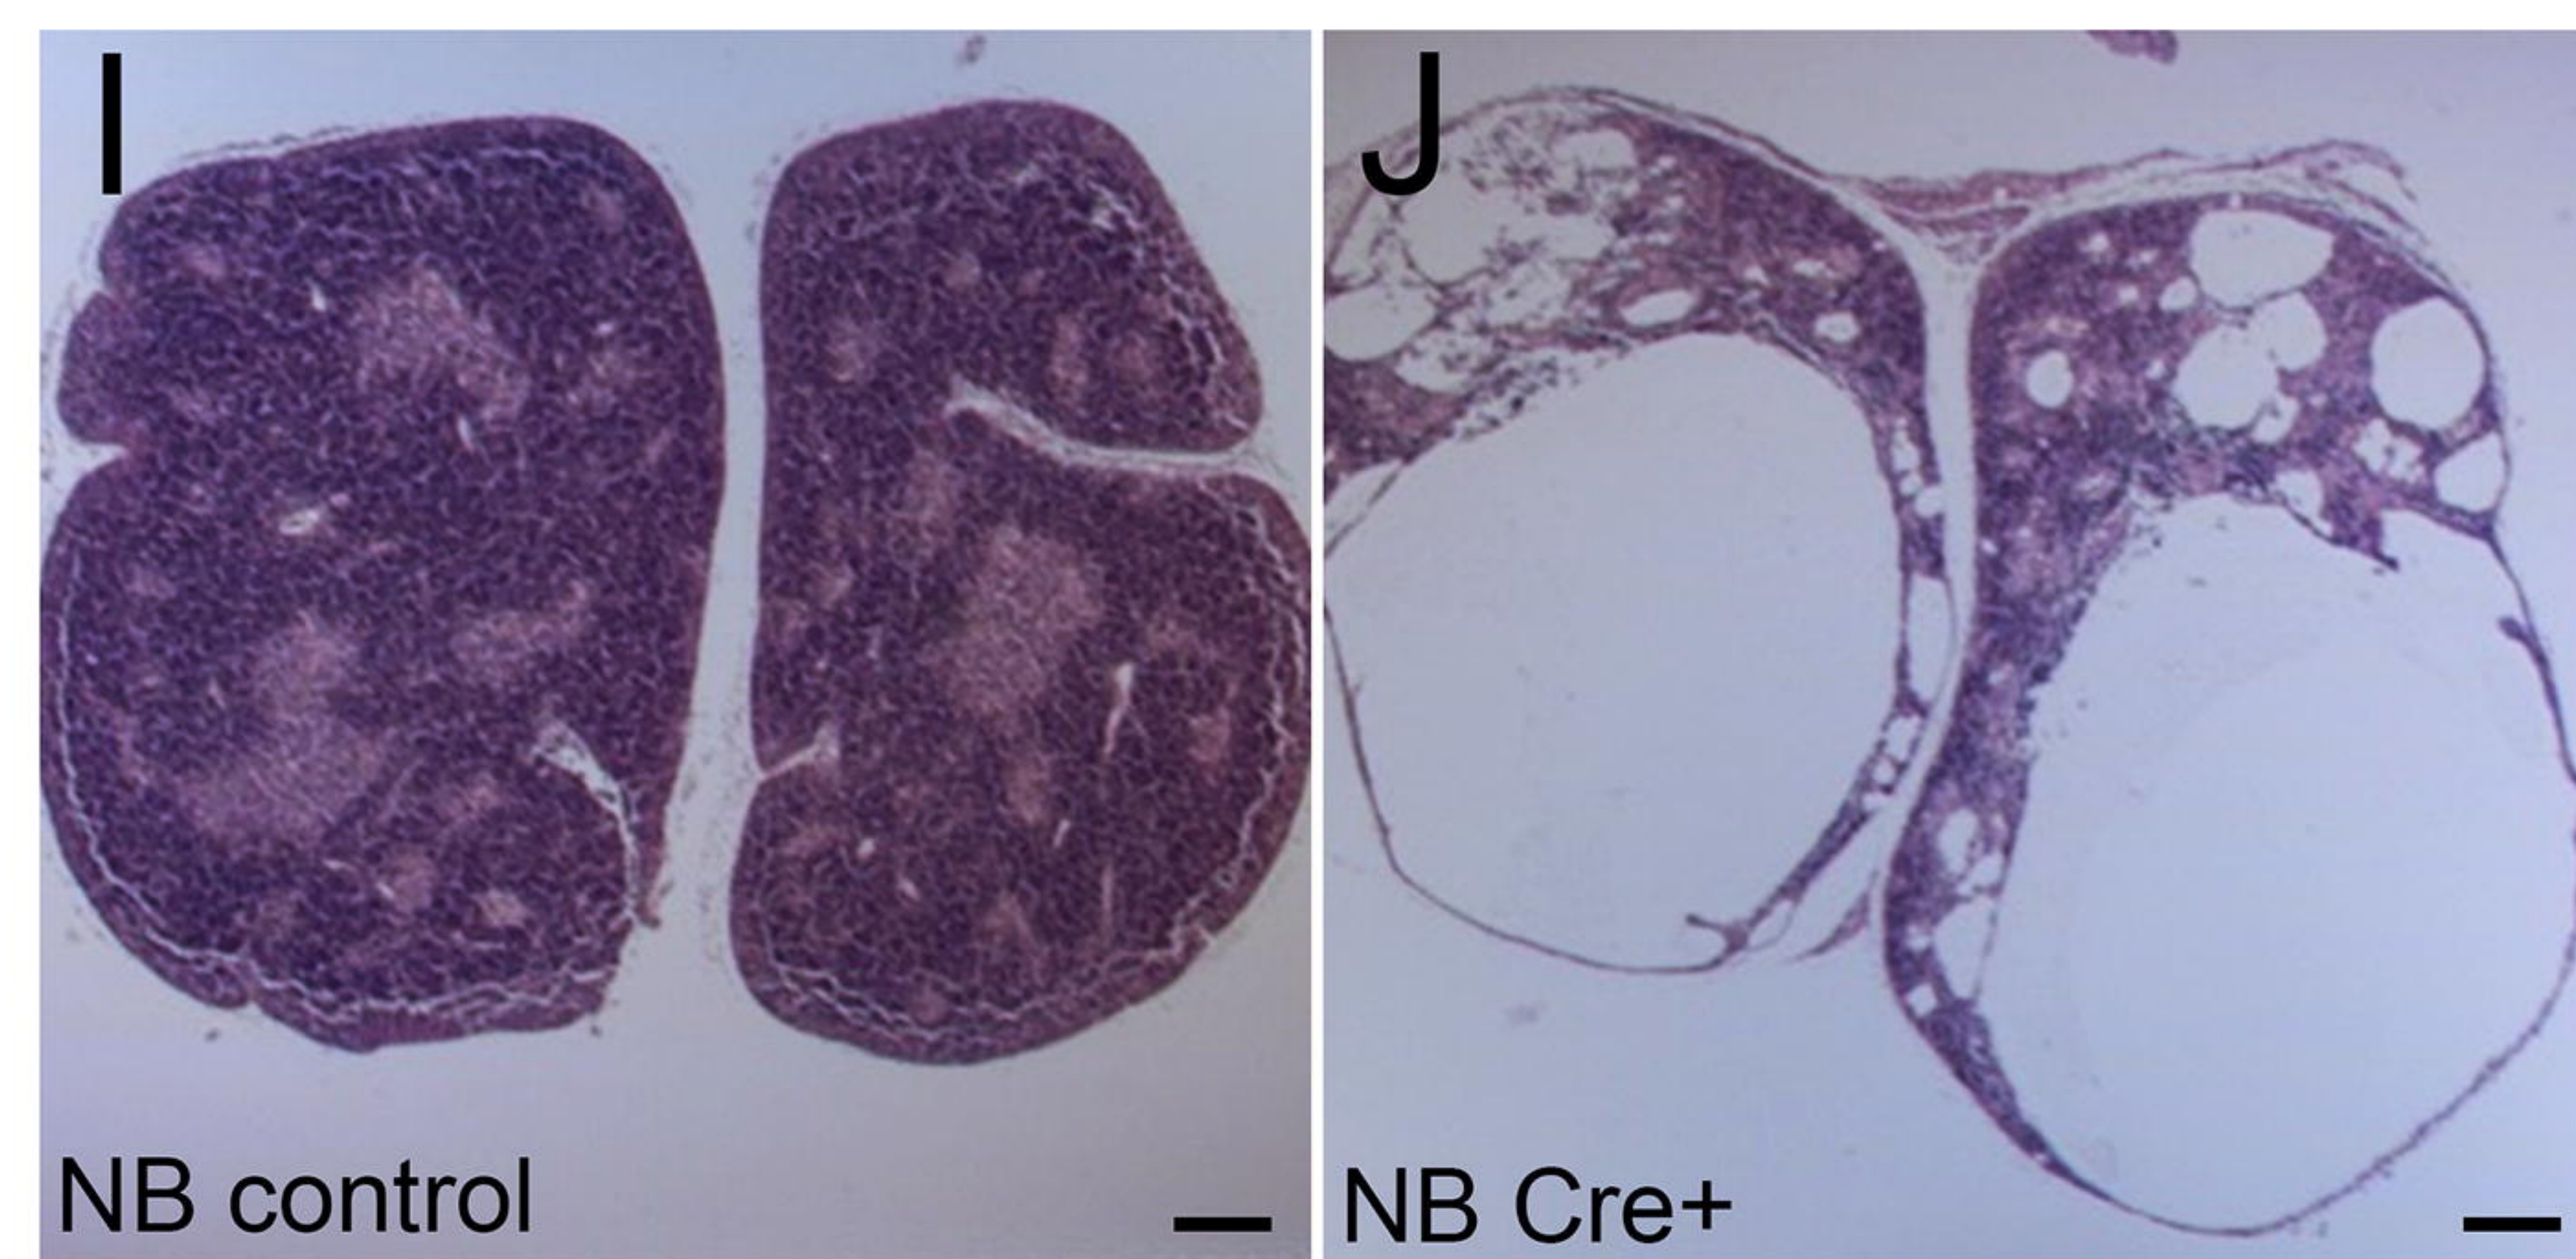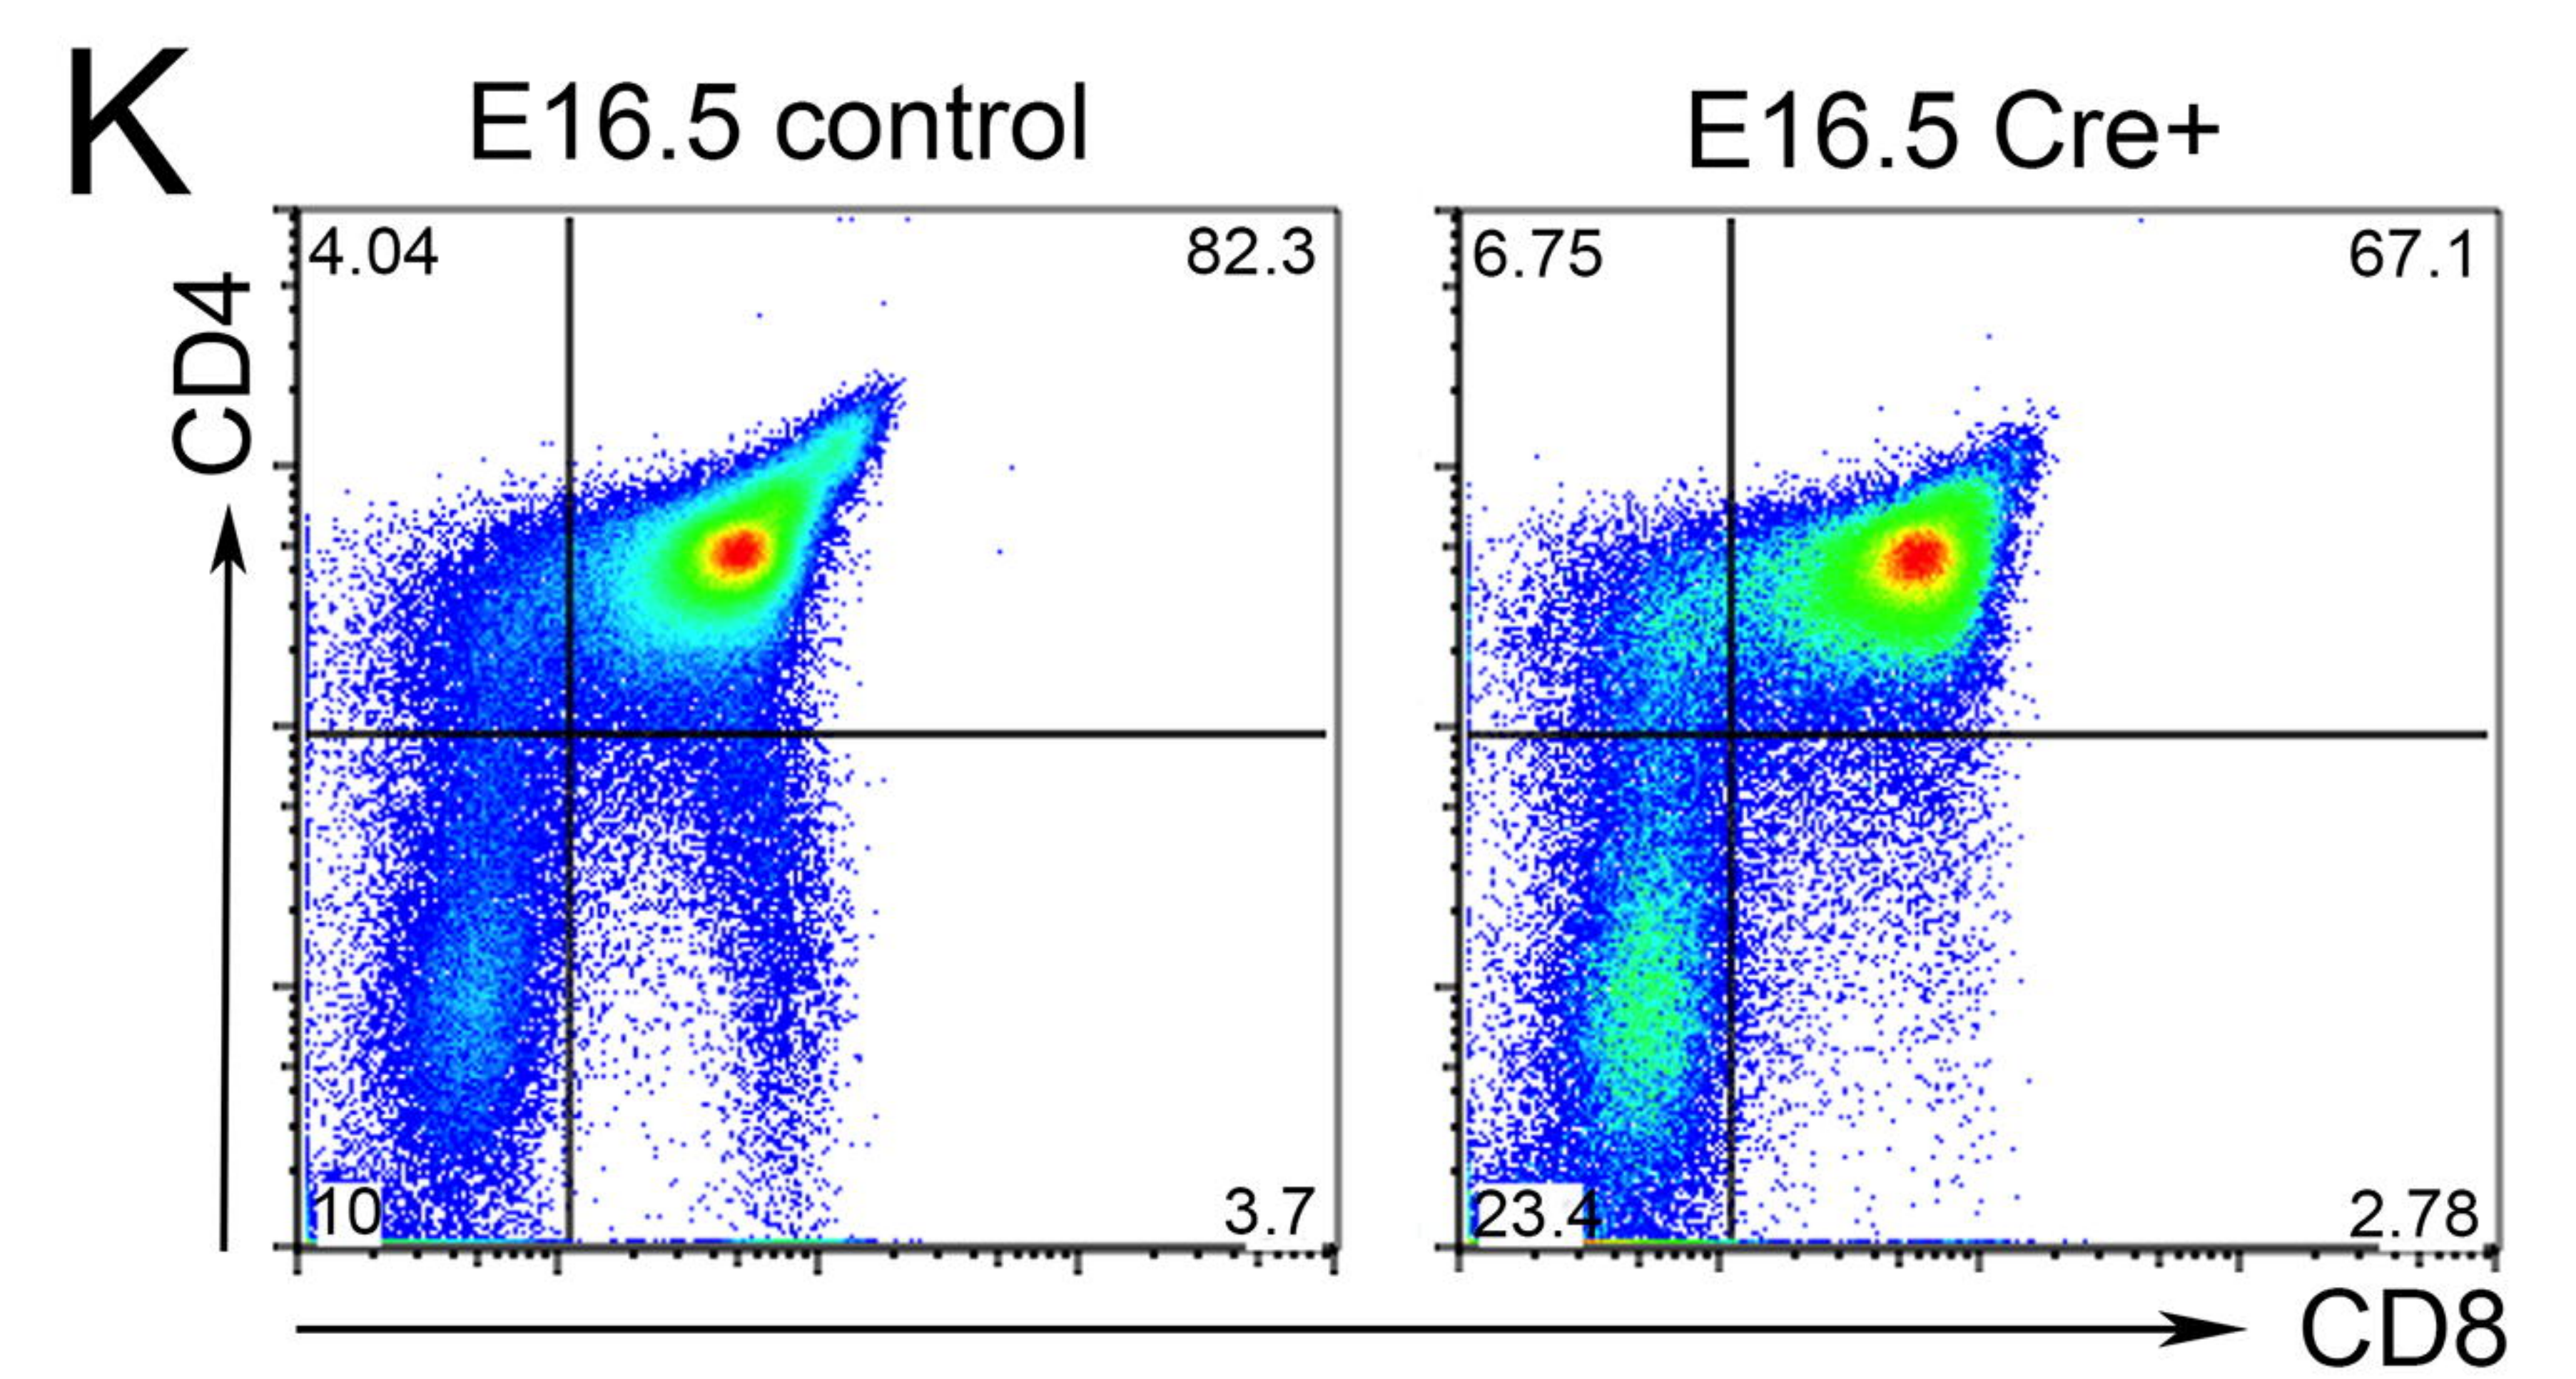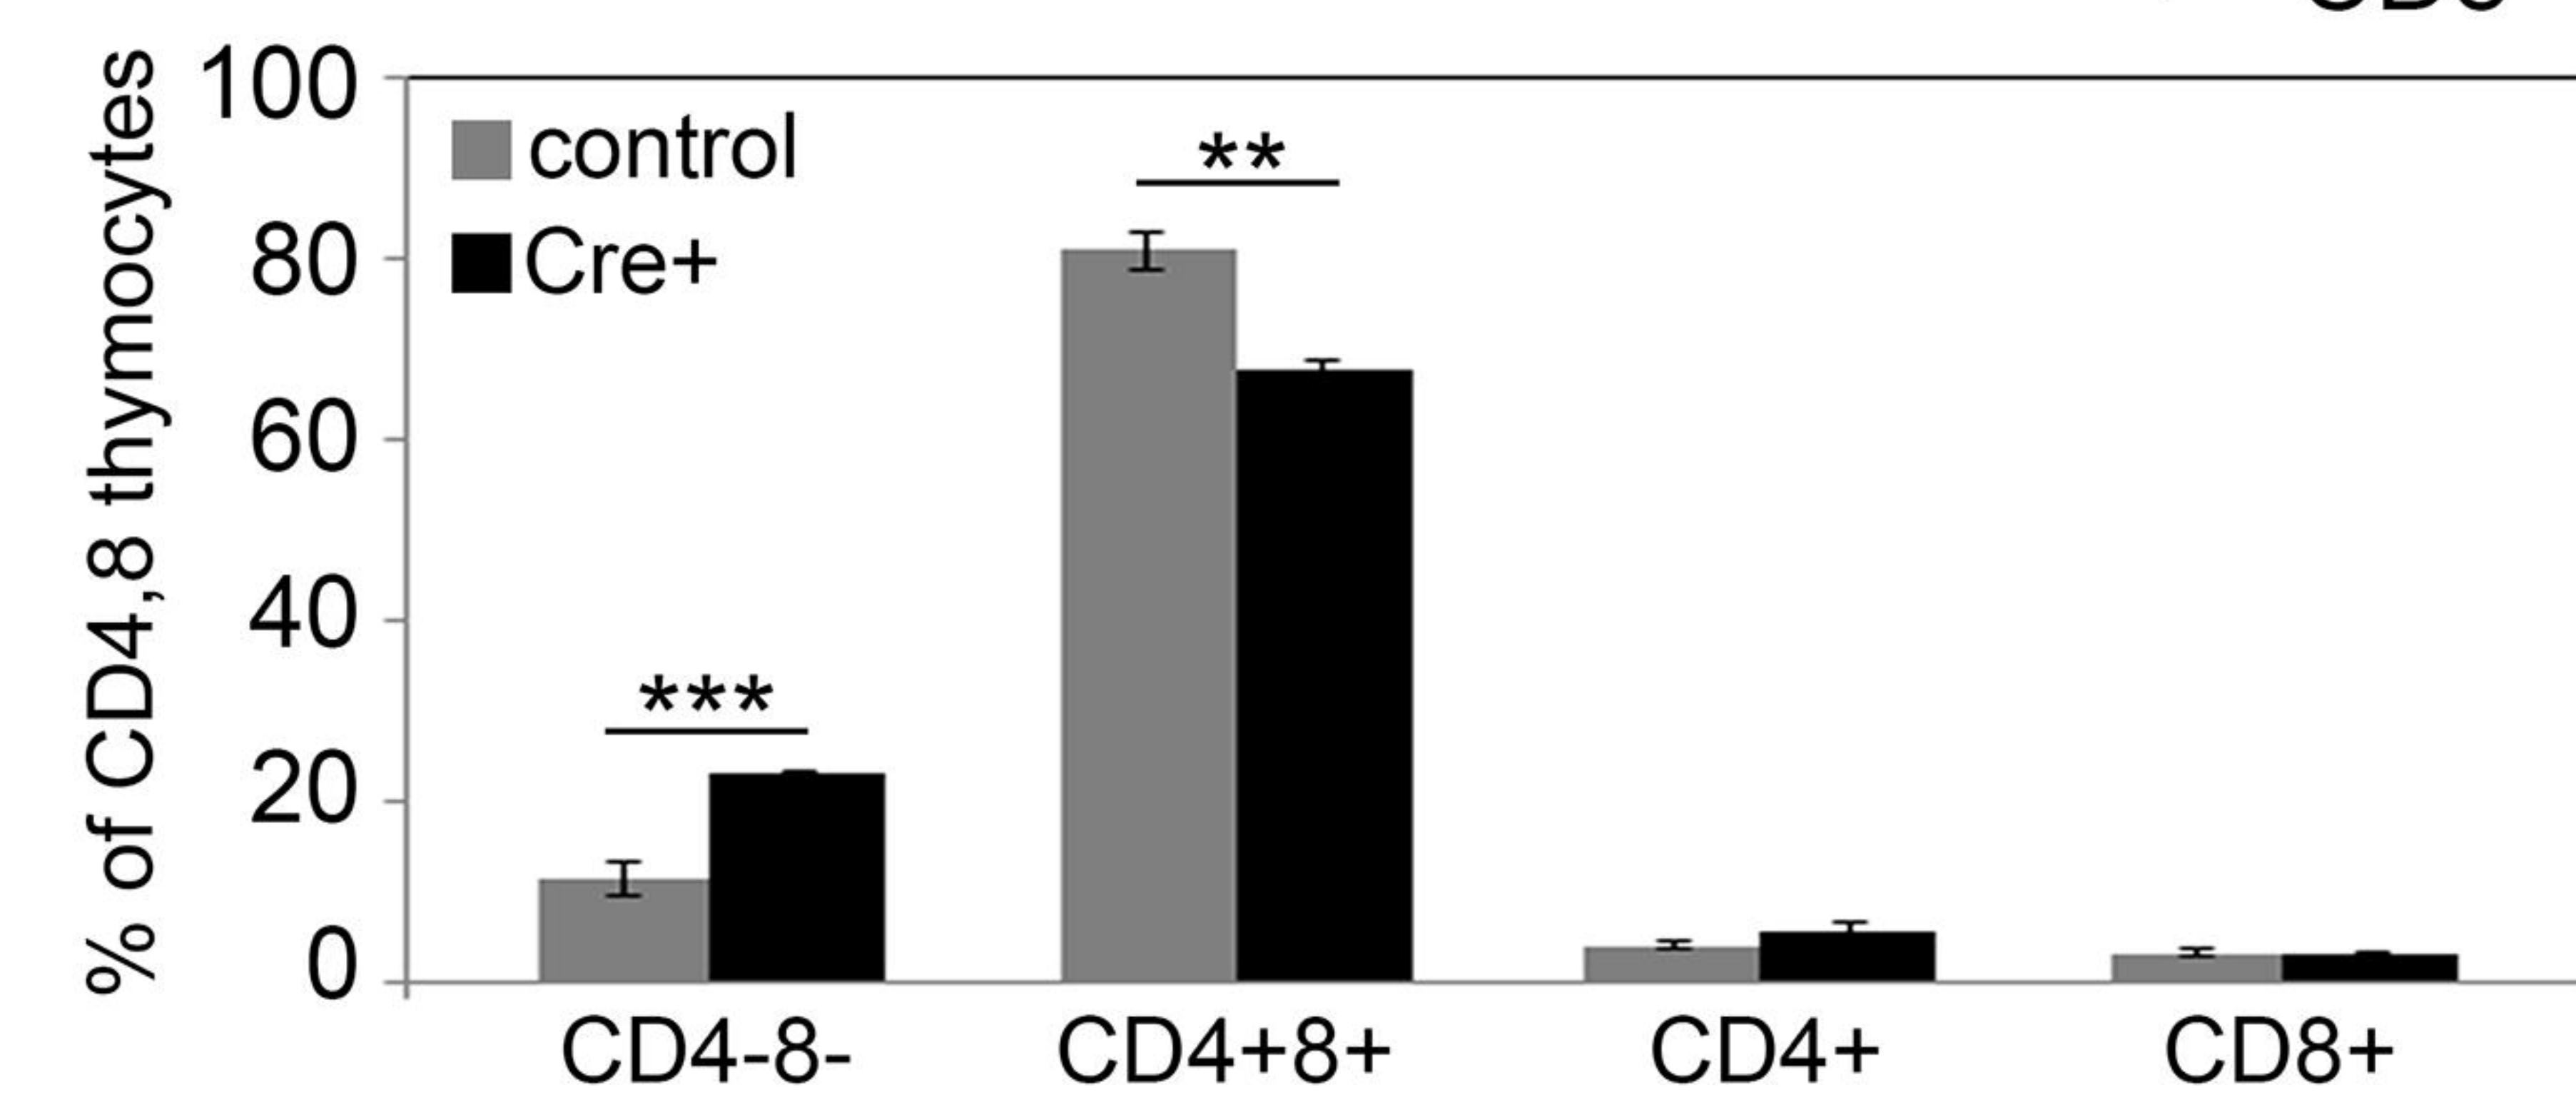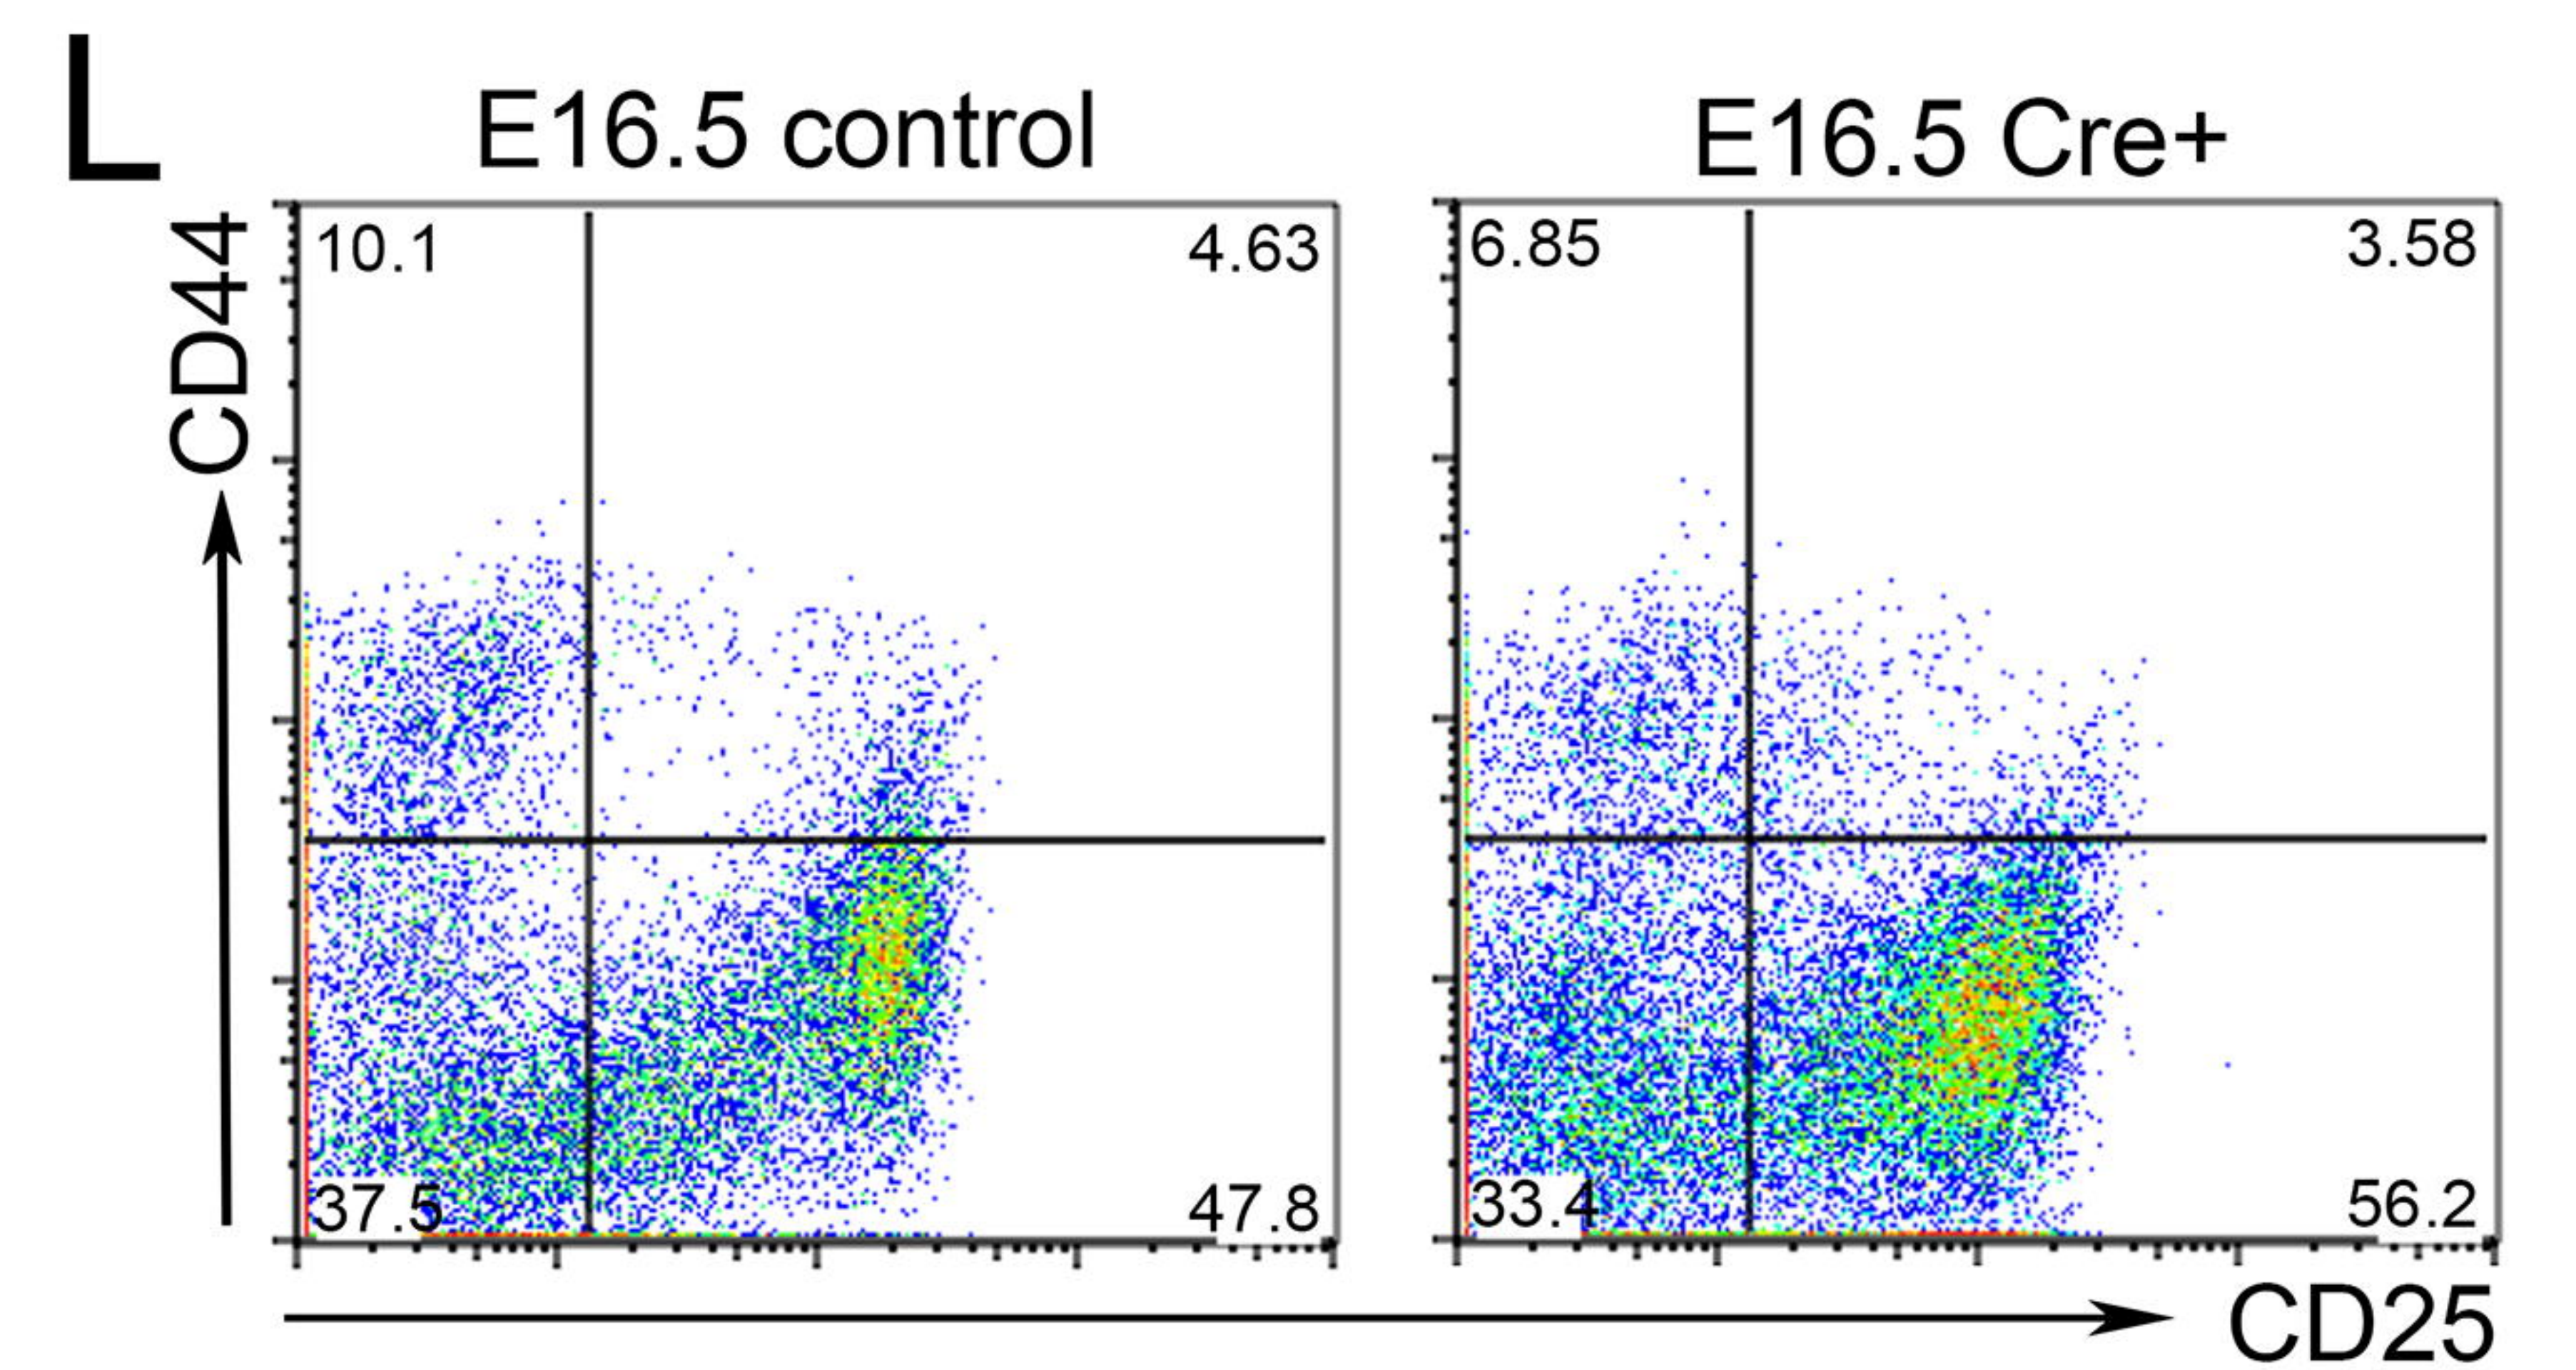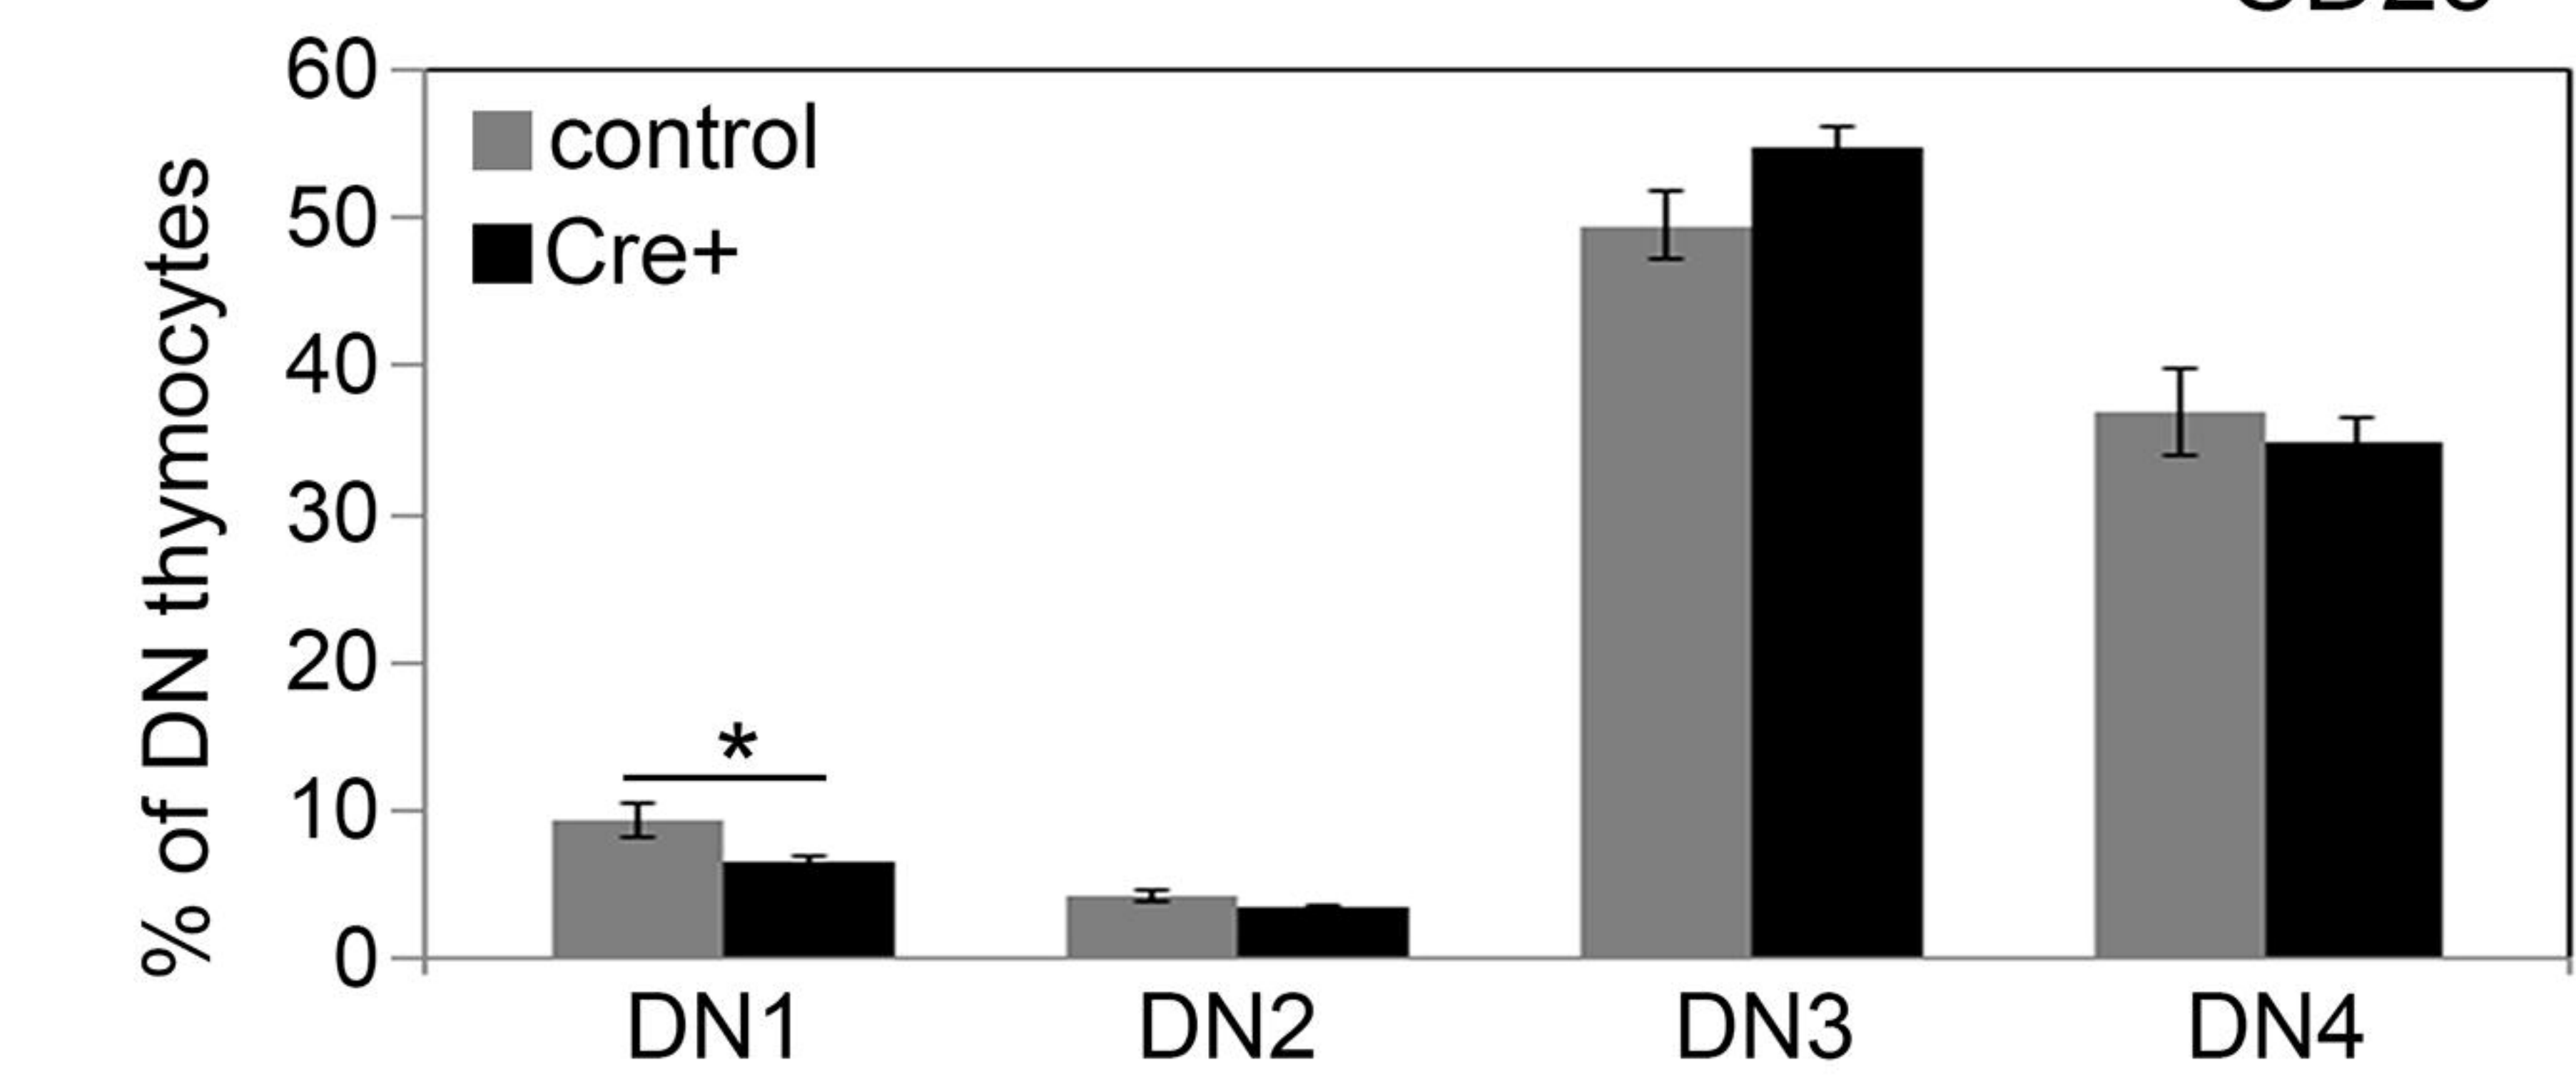



# Figure 6

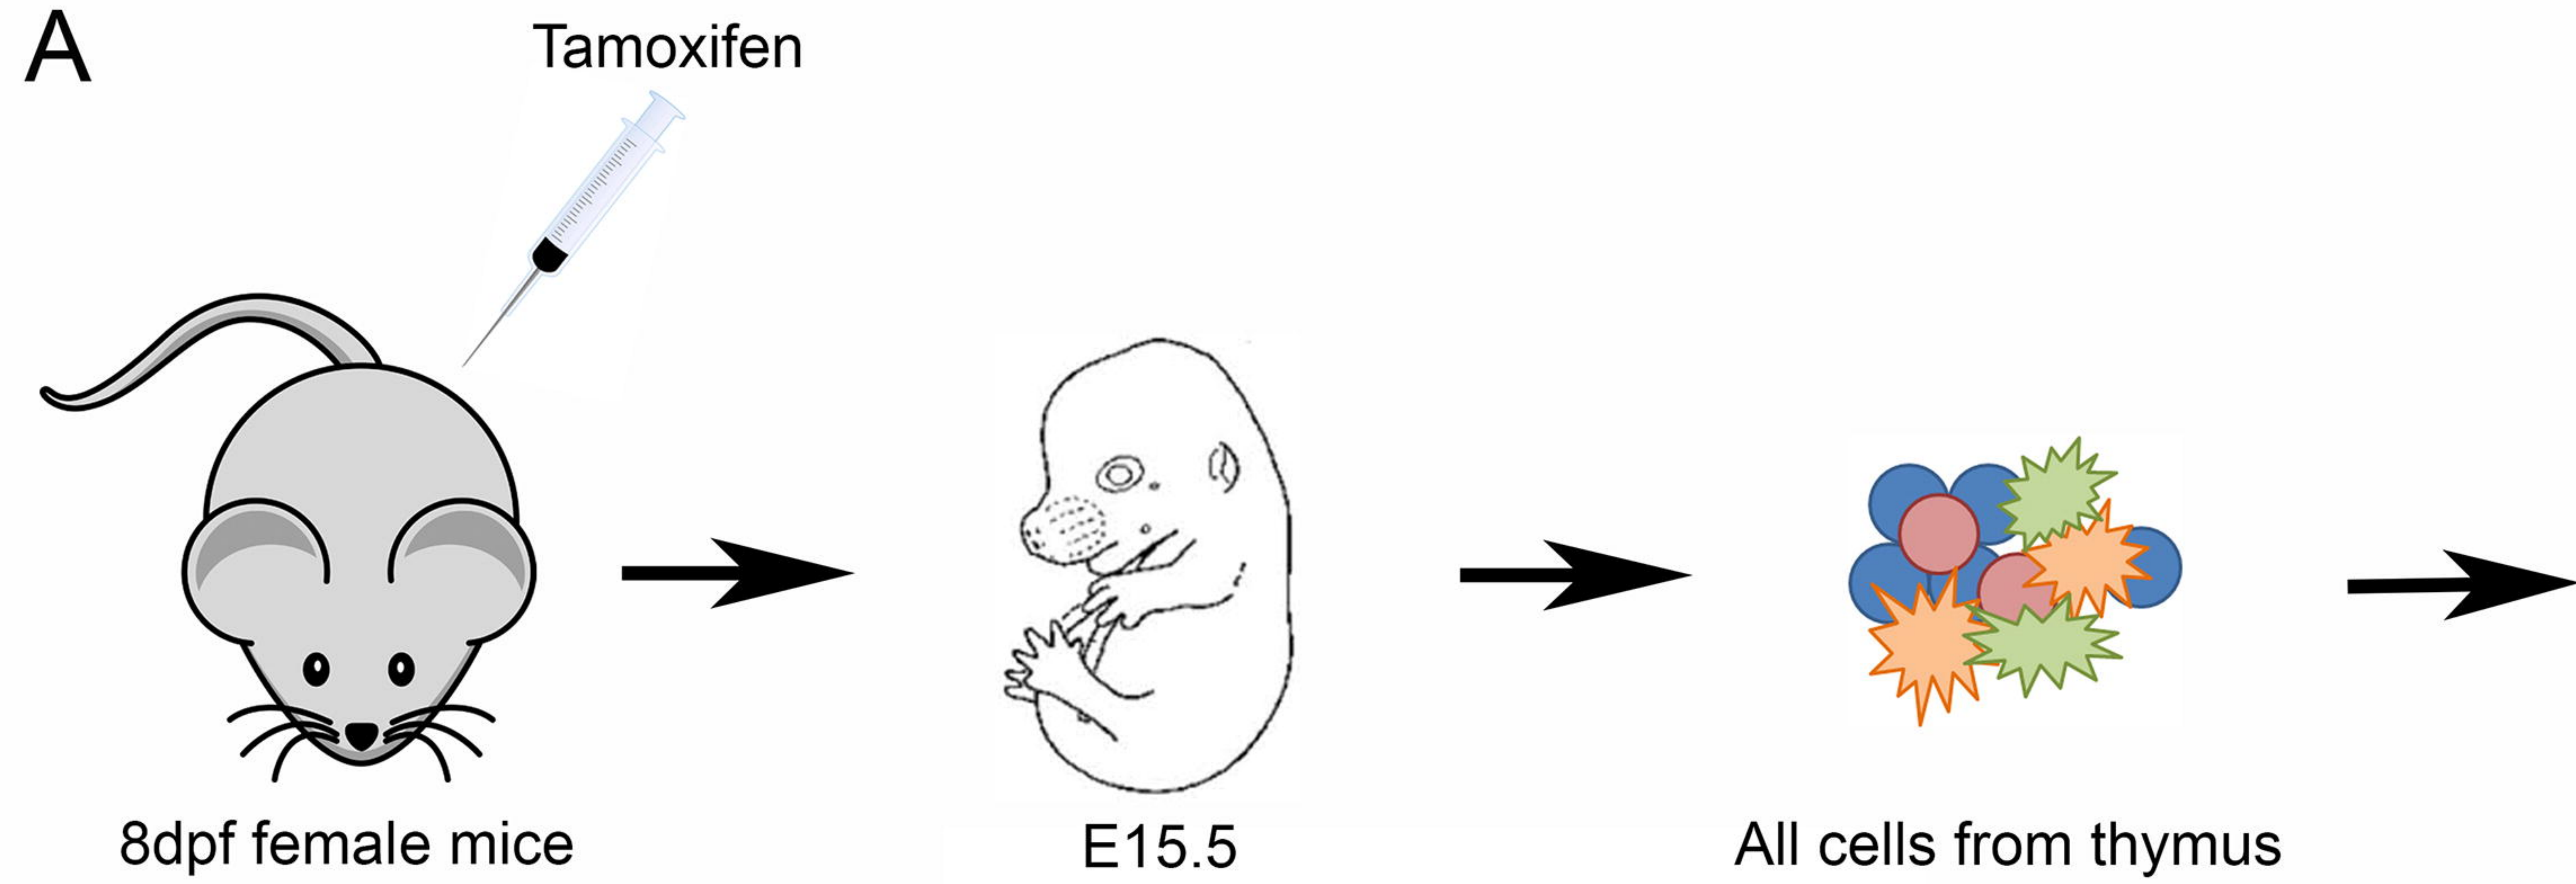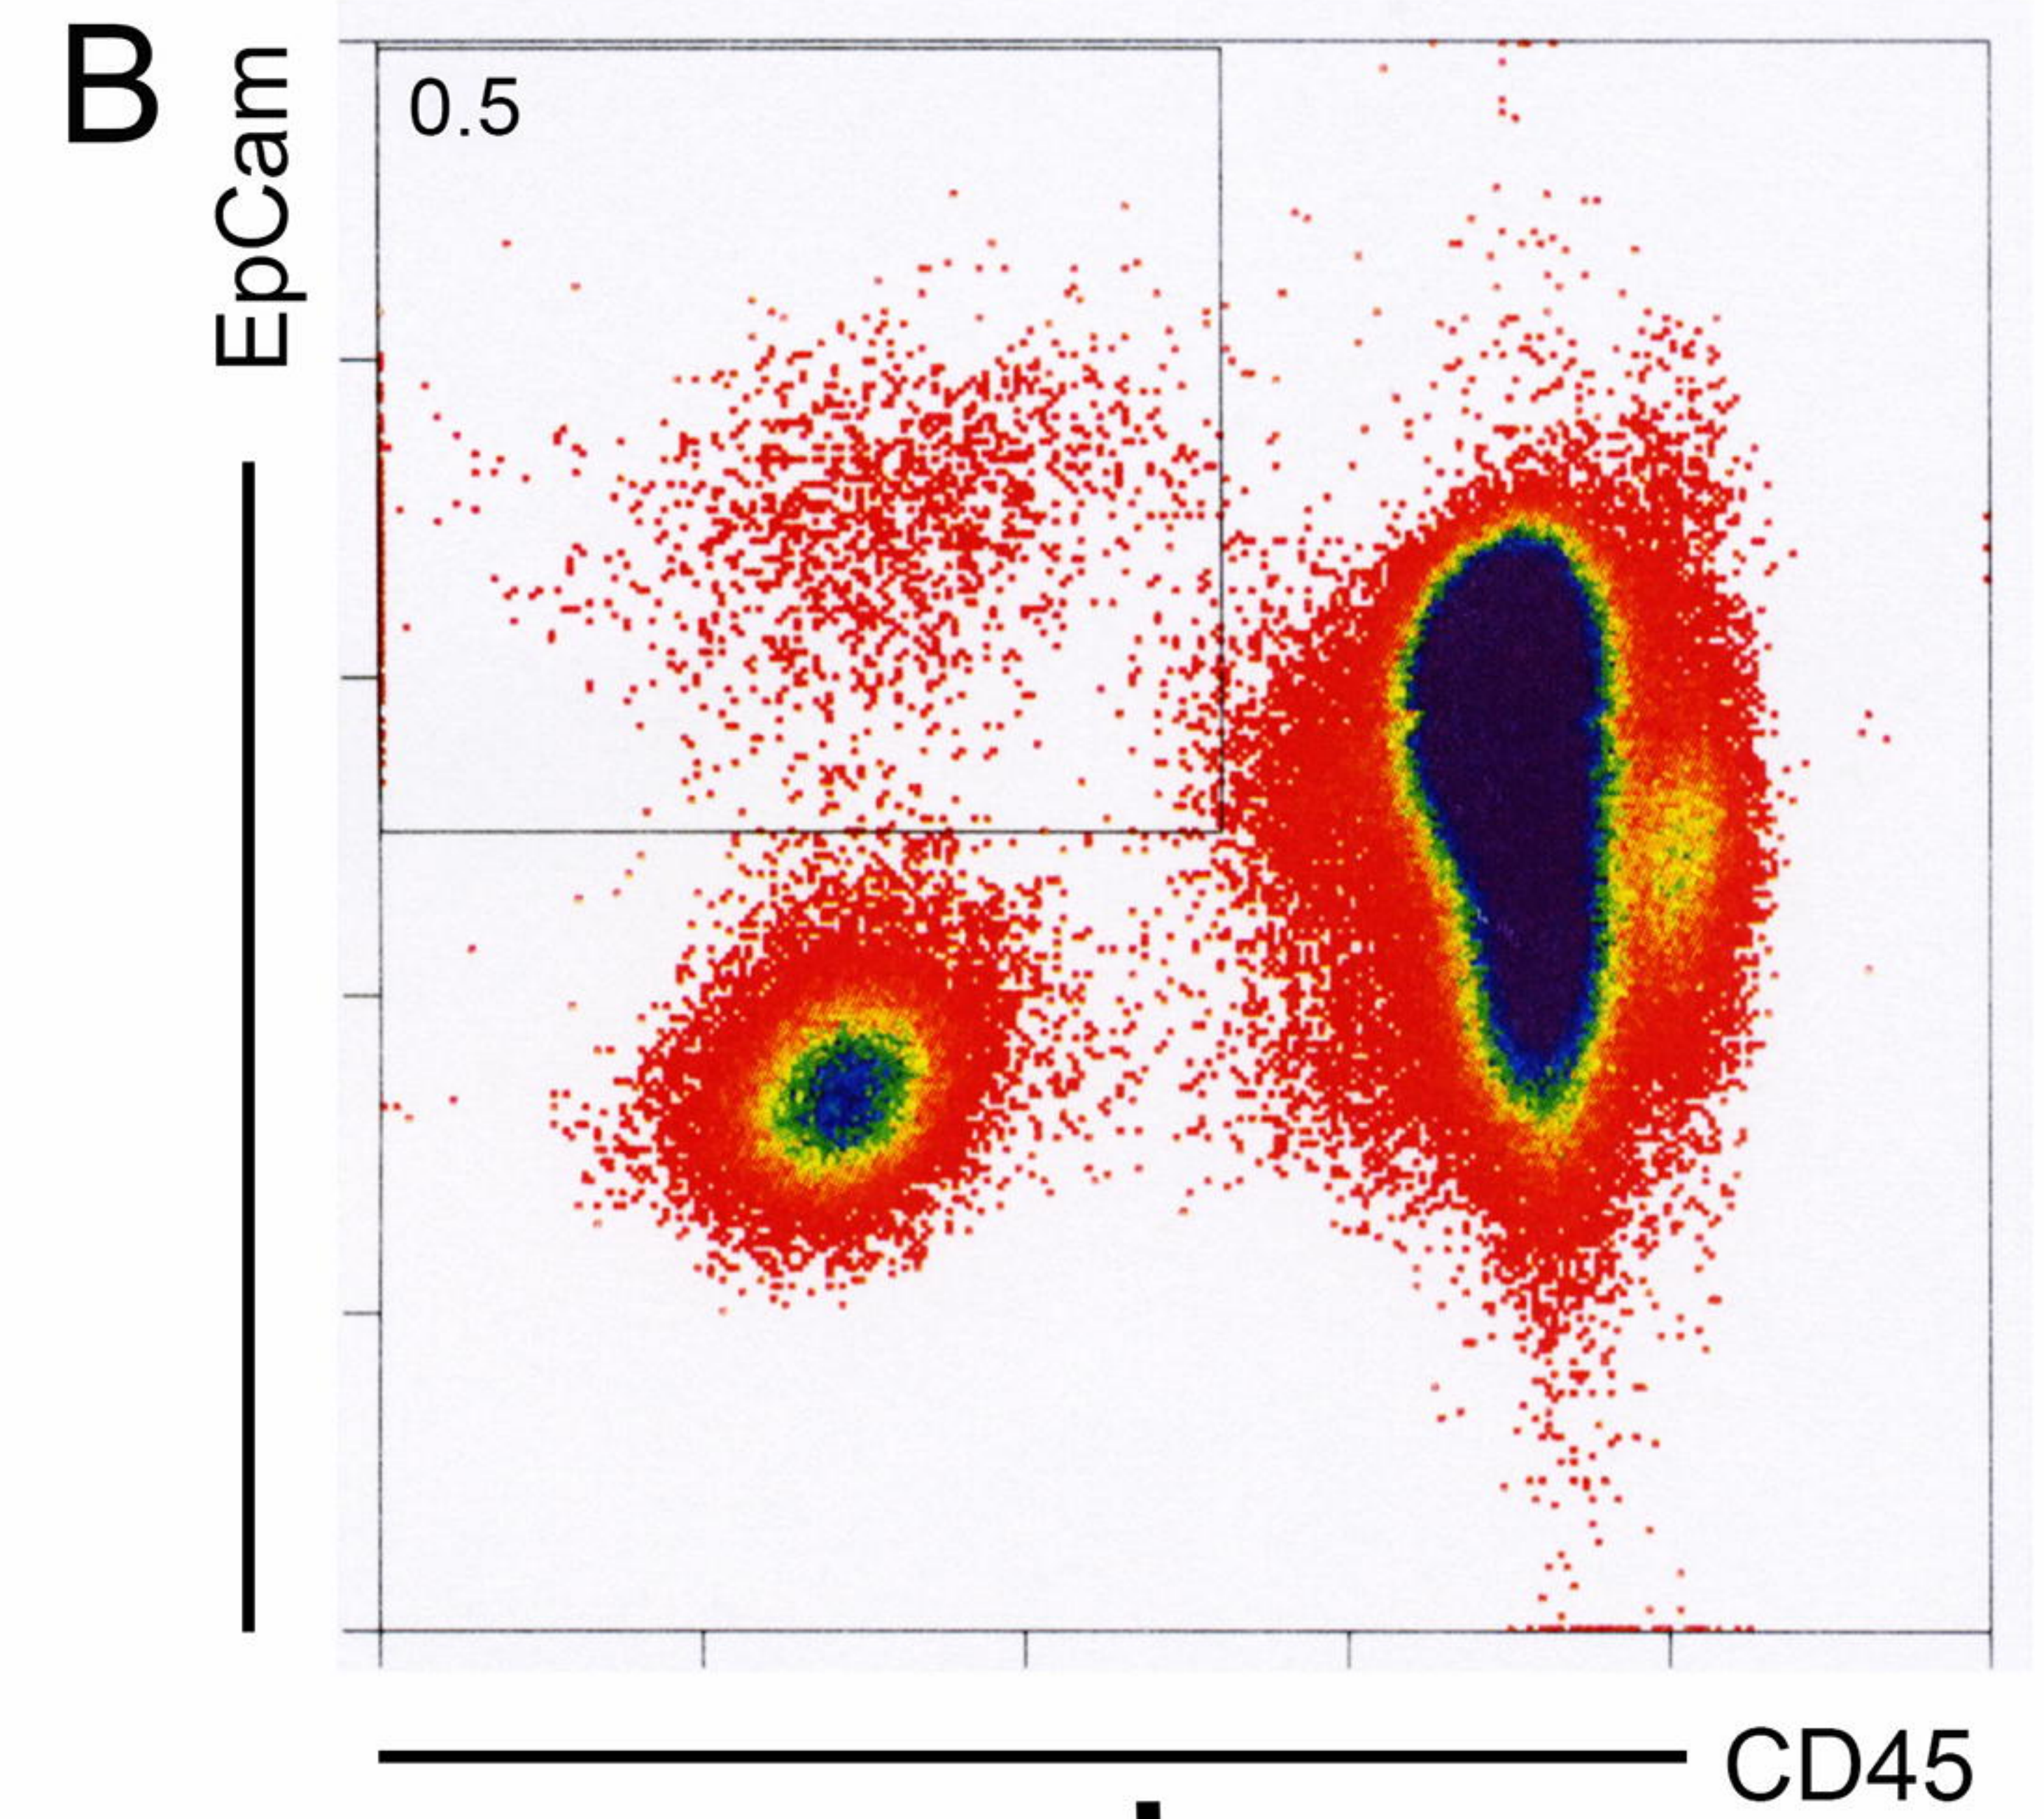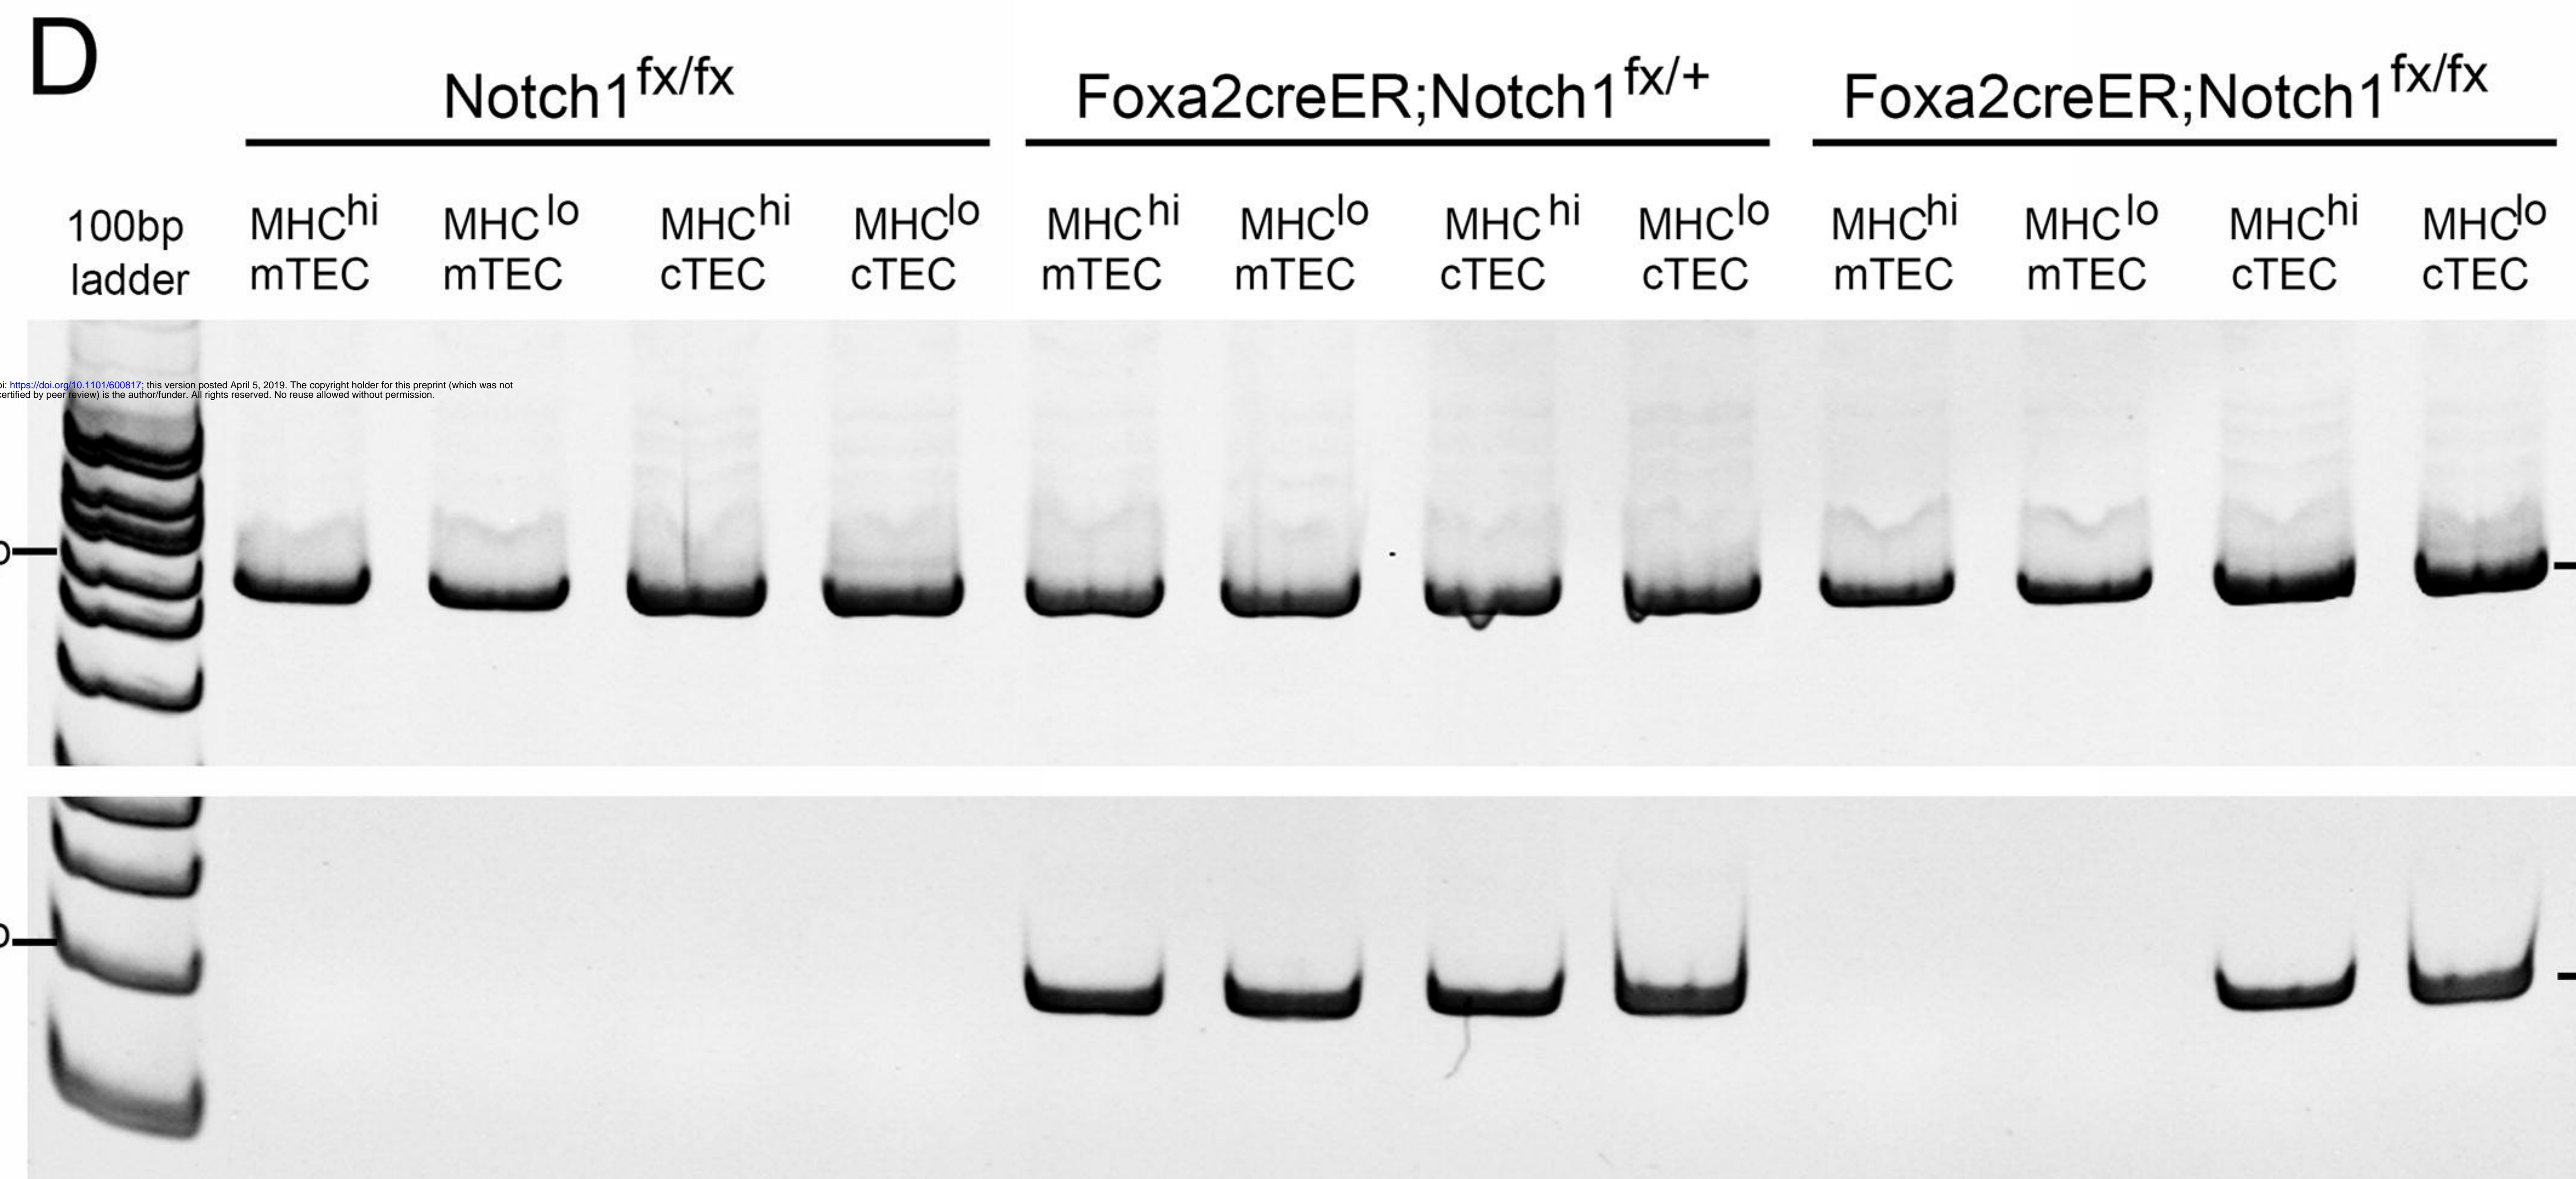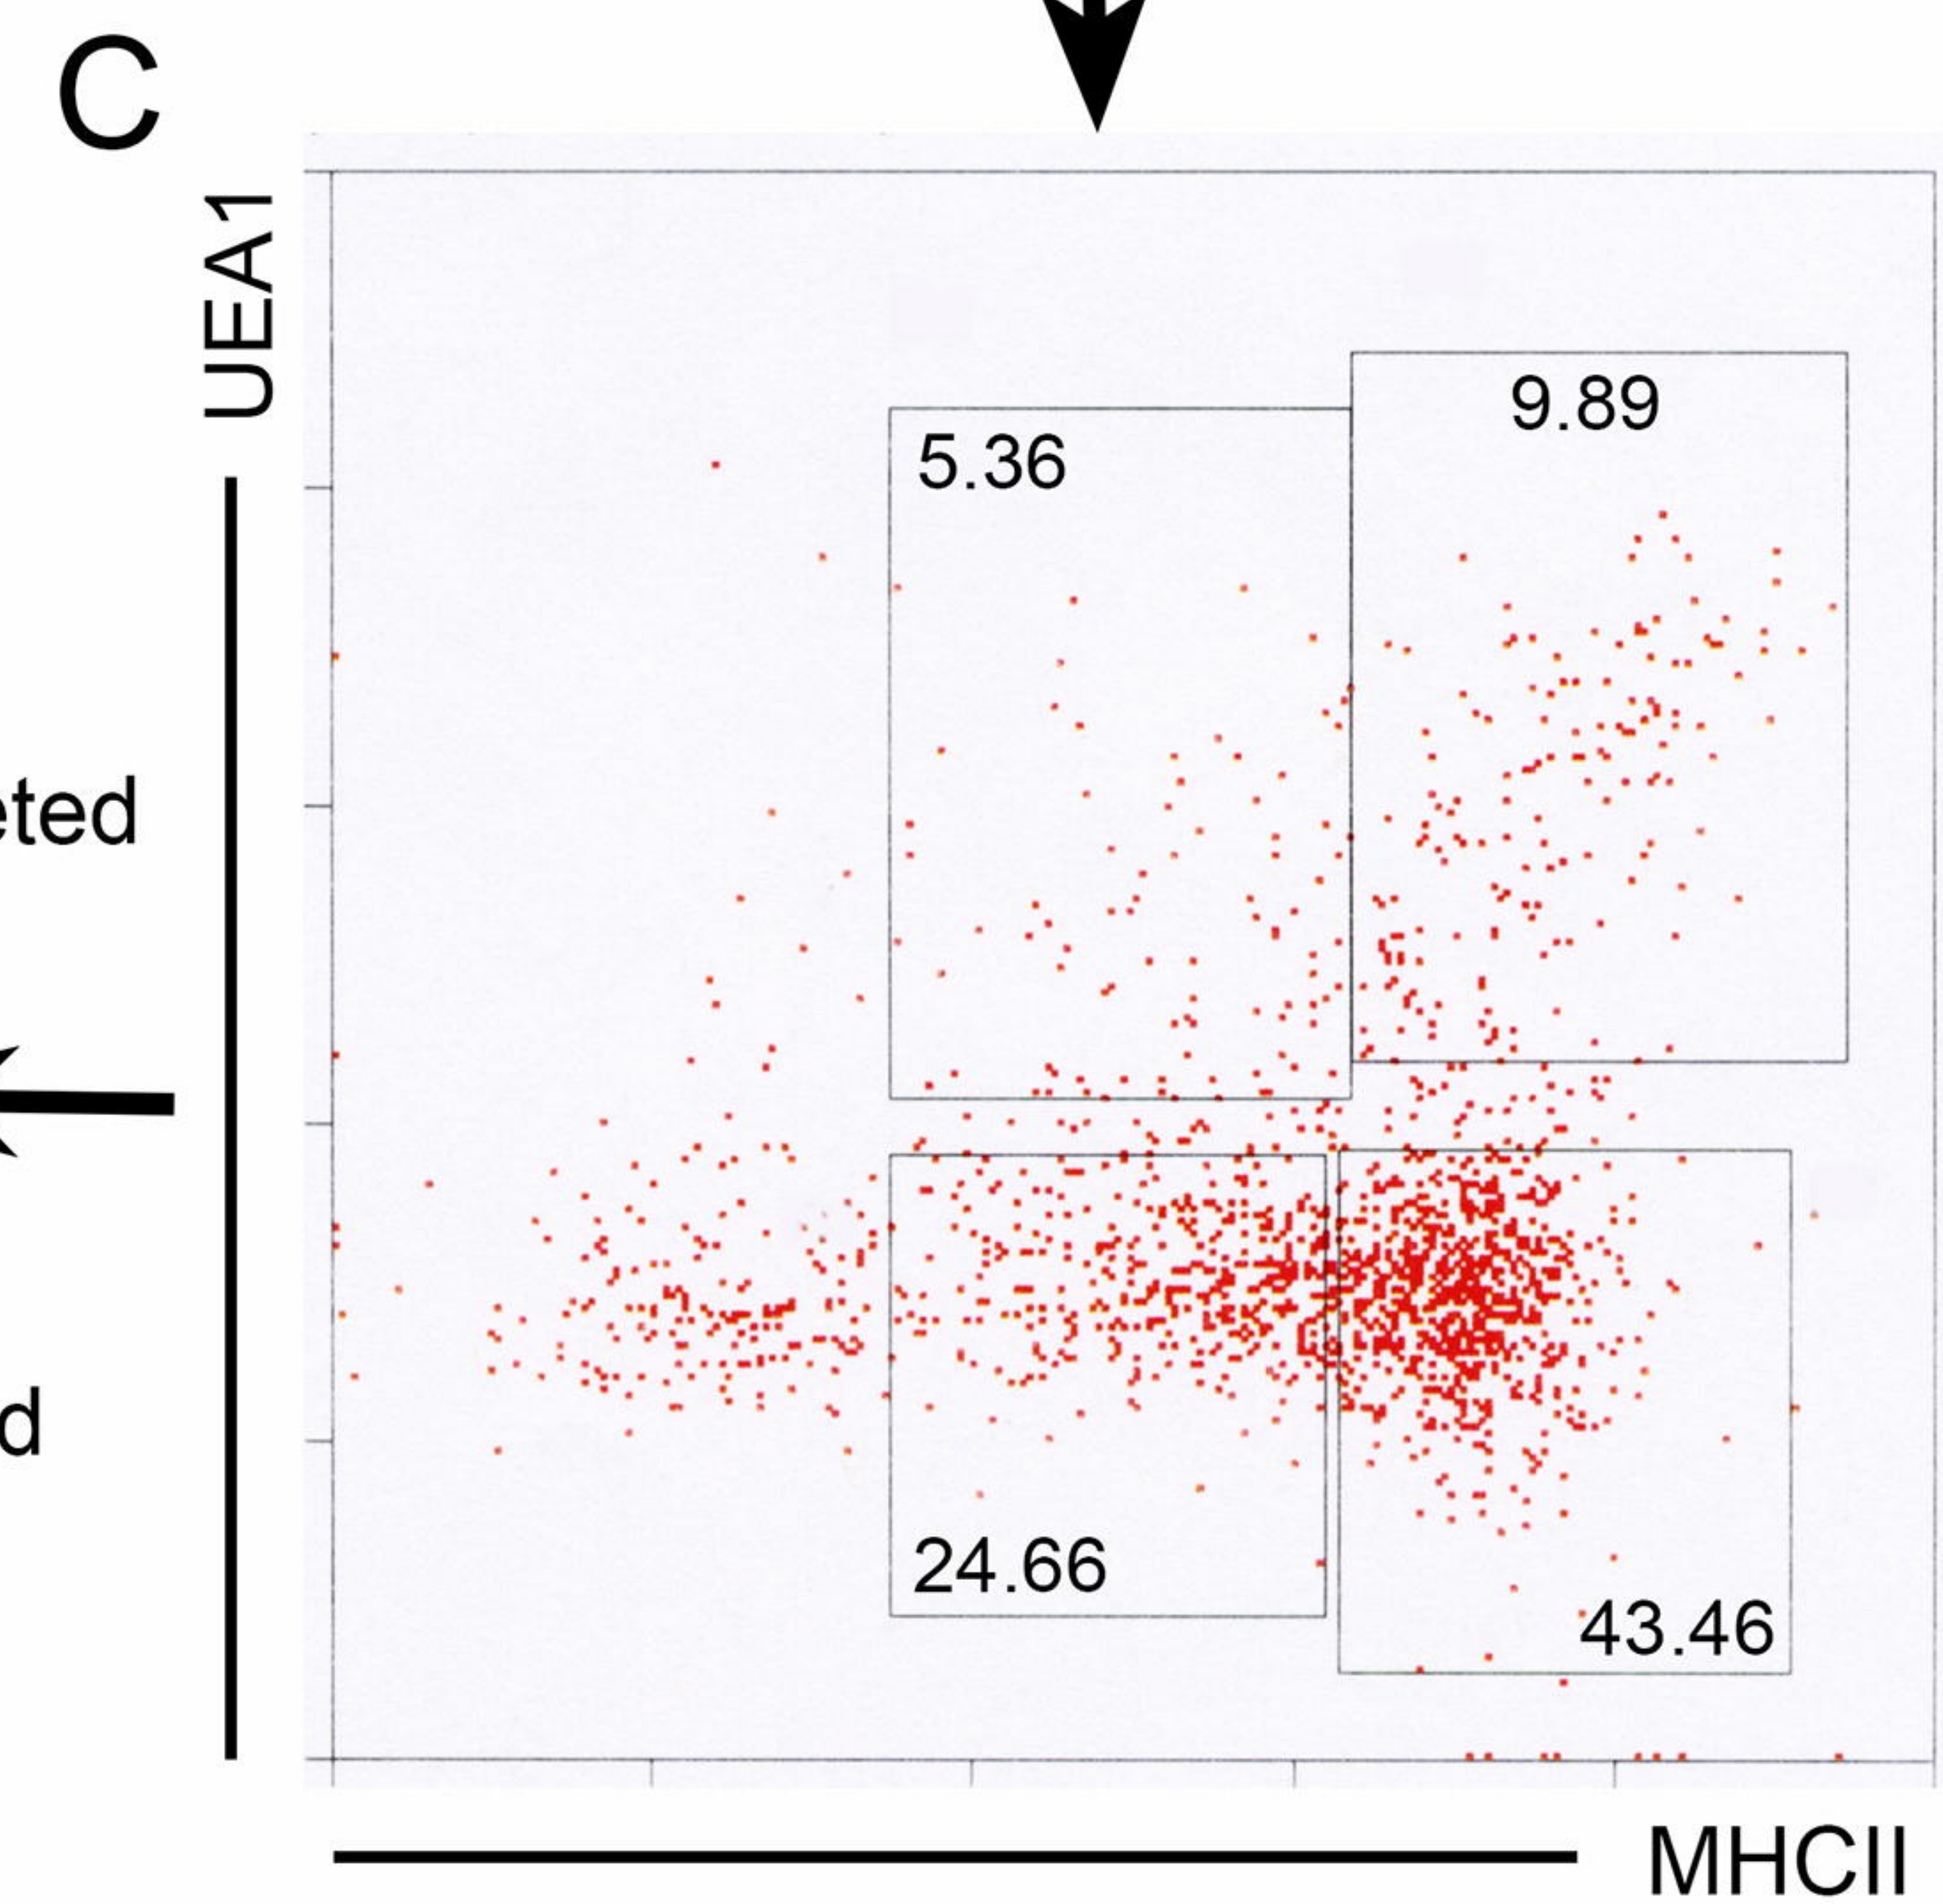



**Figure 7**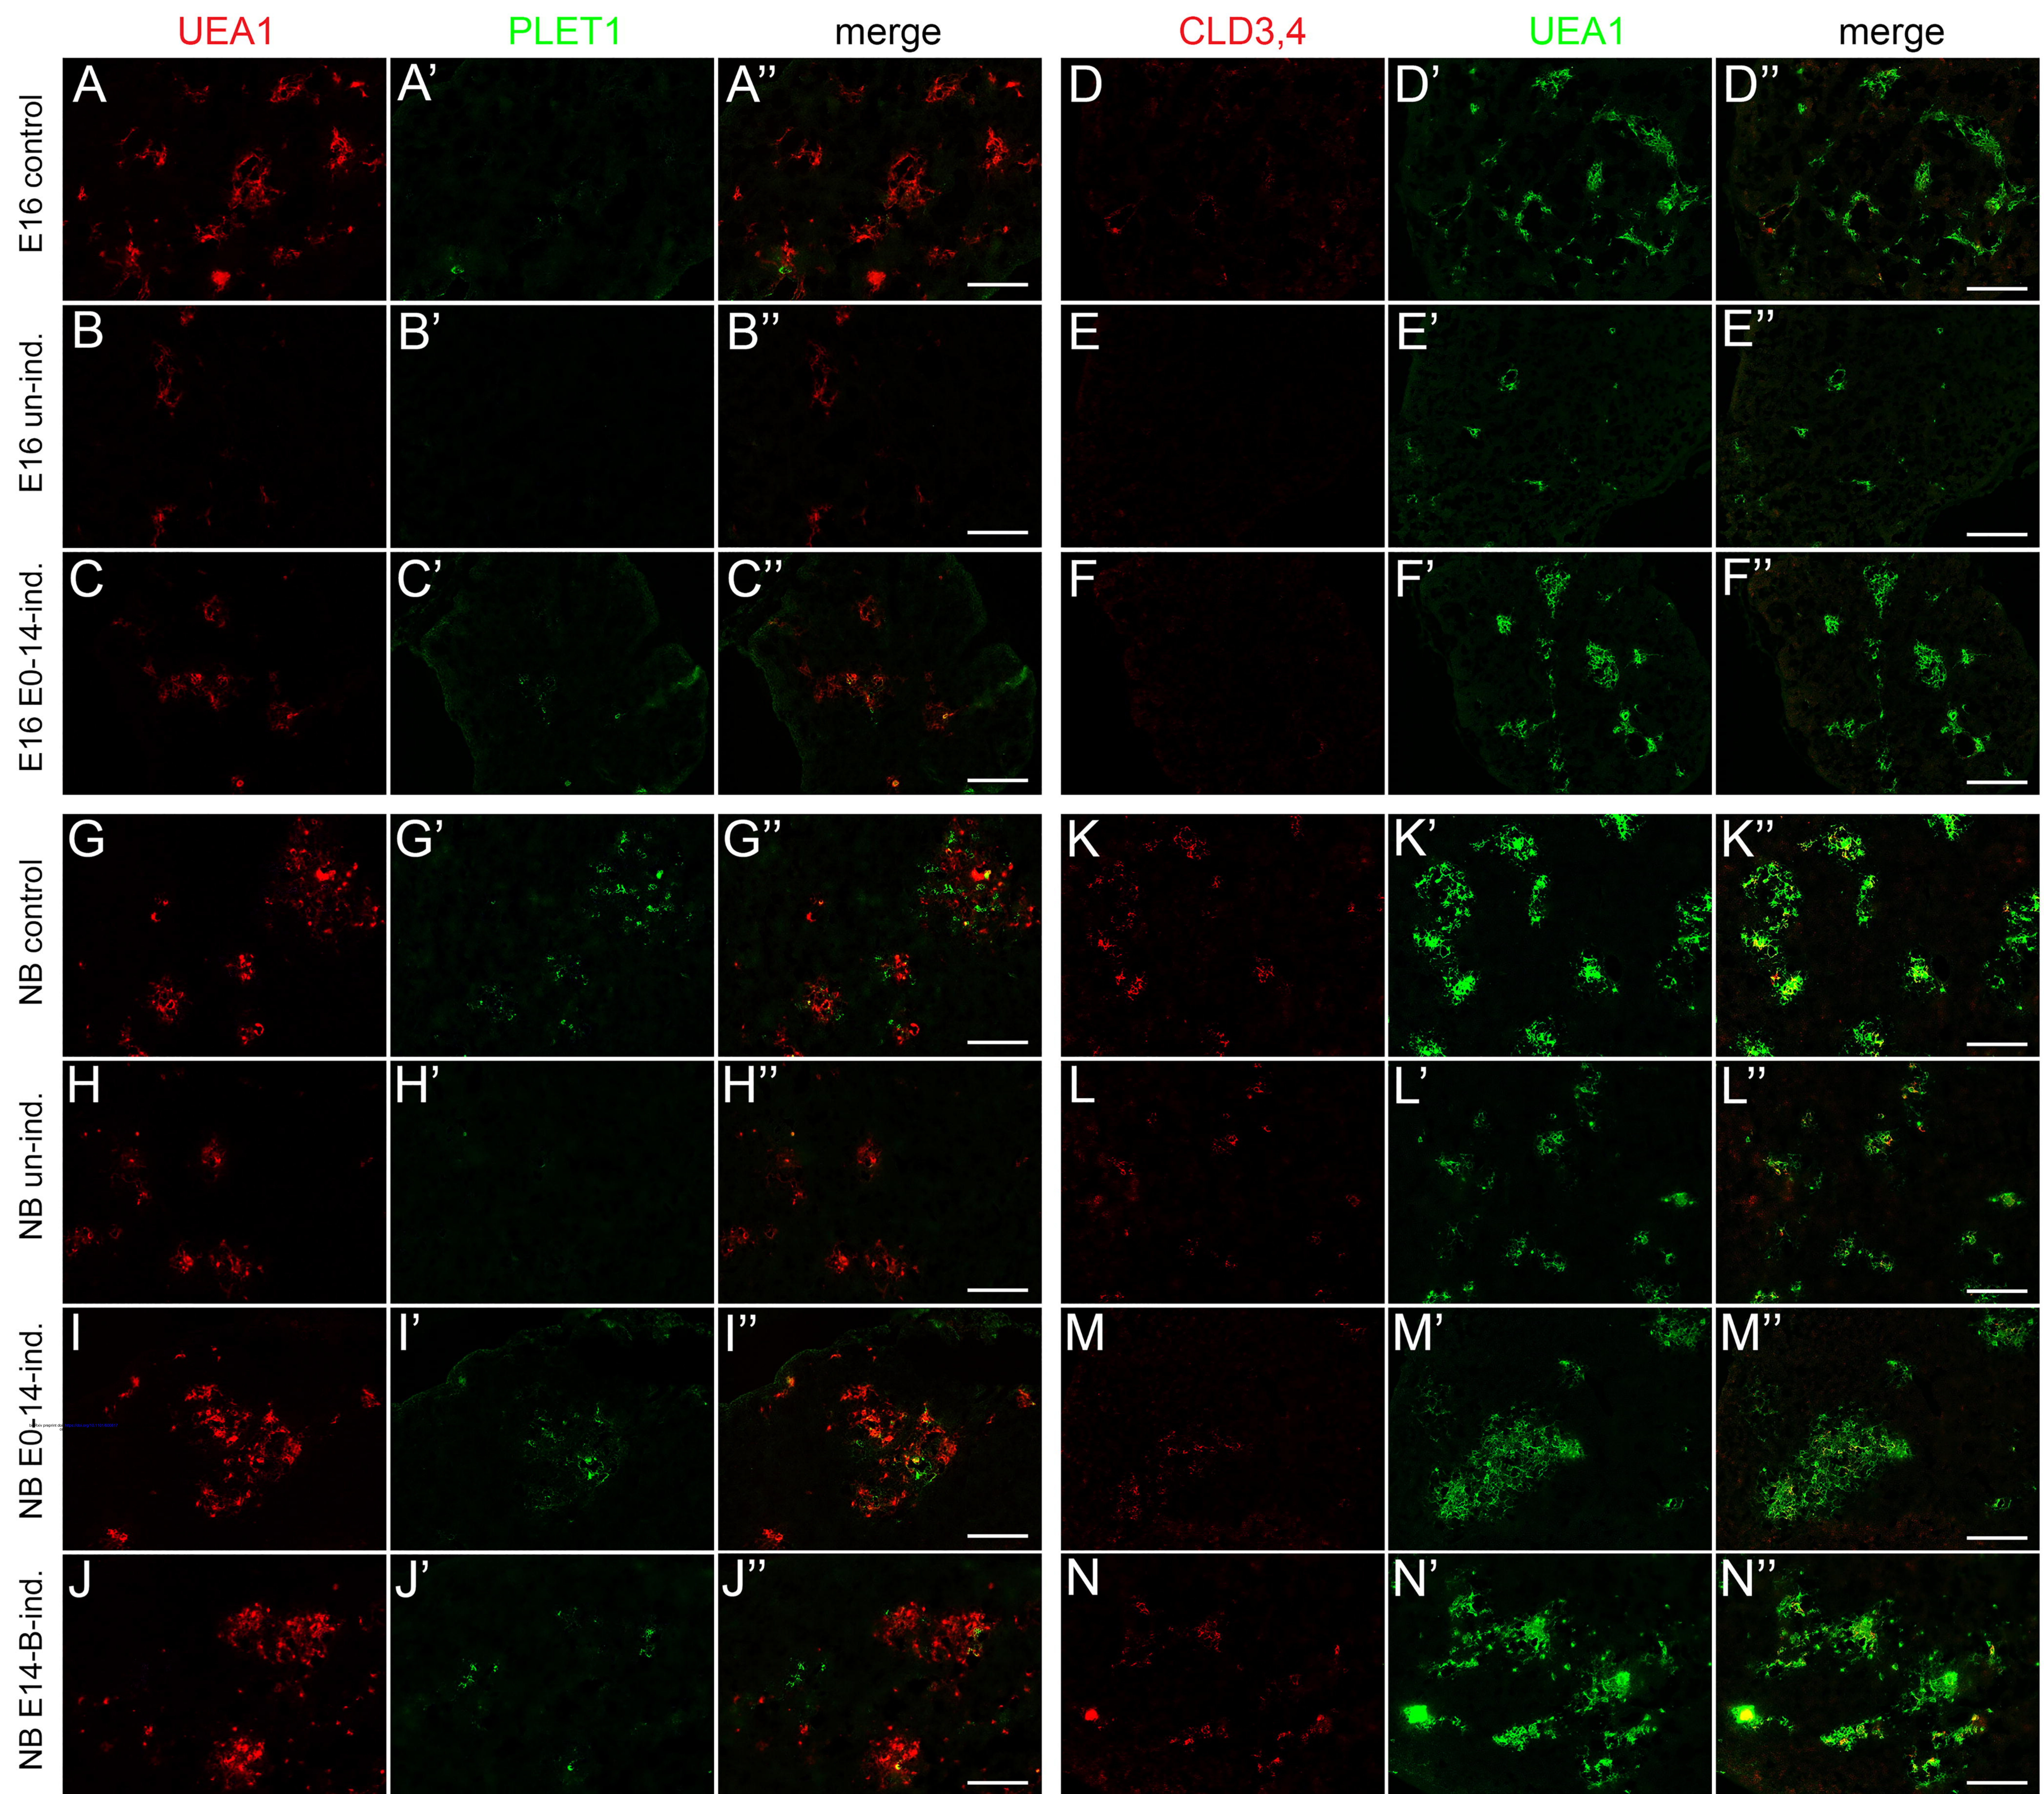



# Figure 8

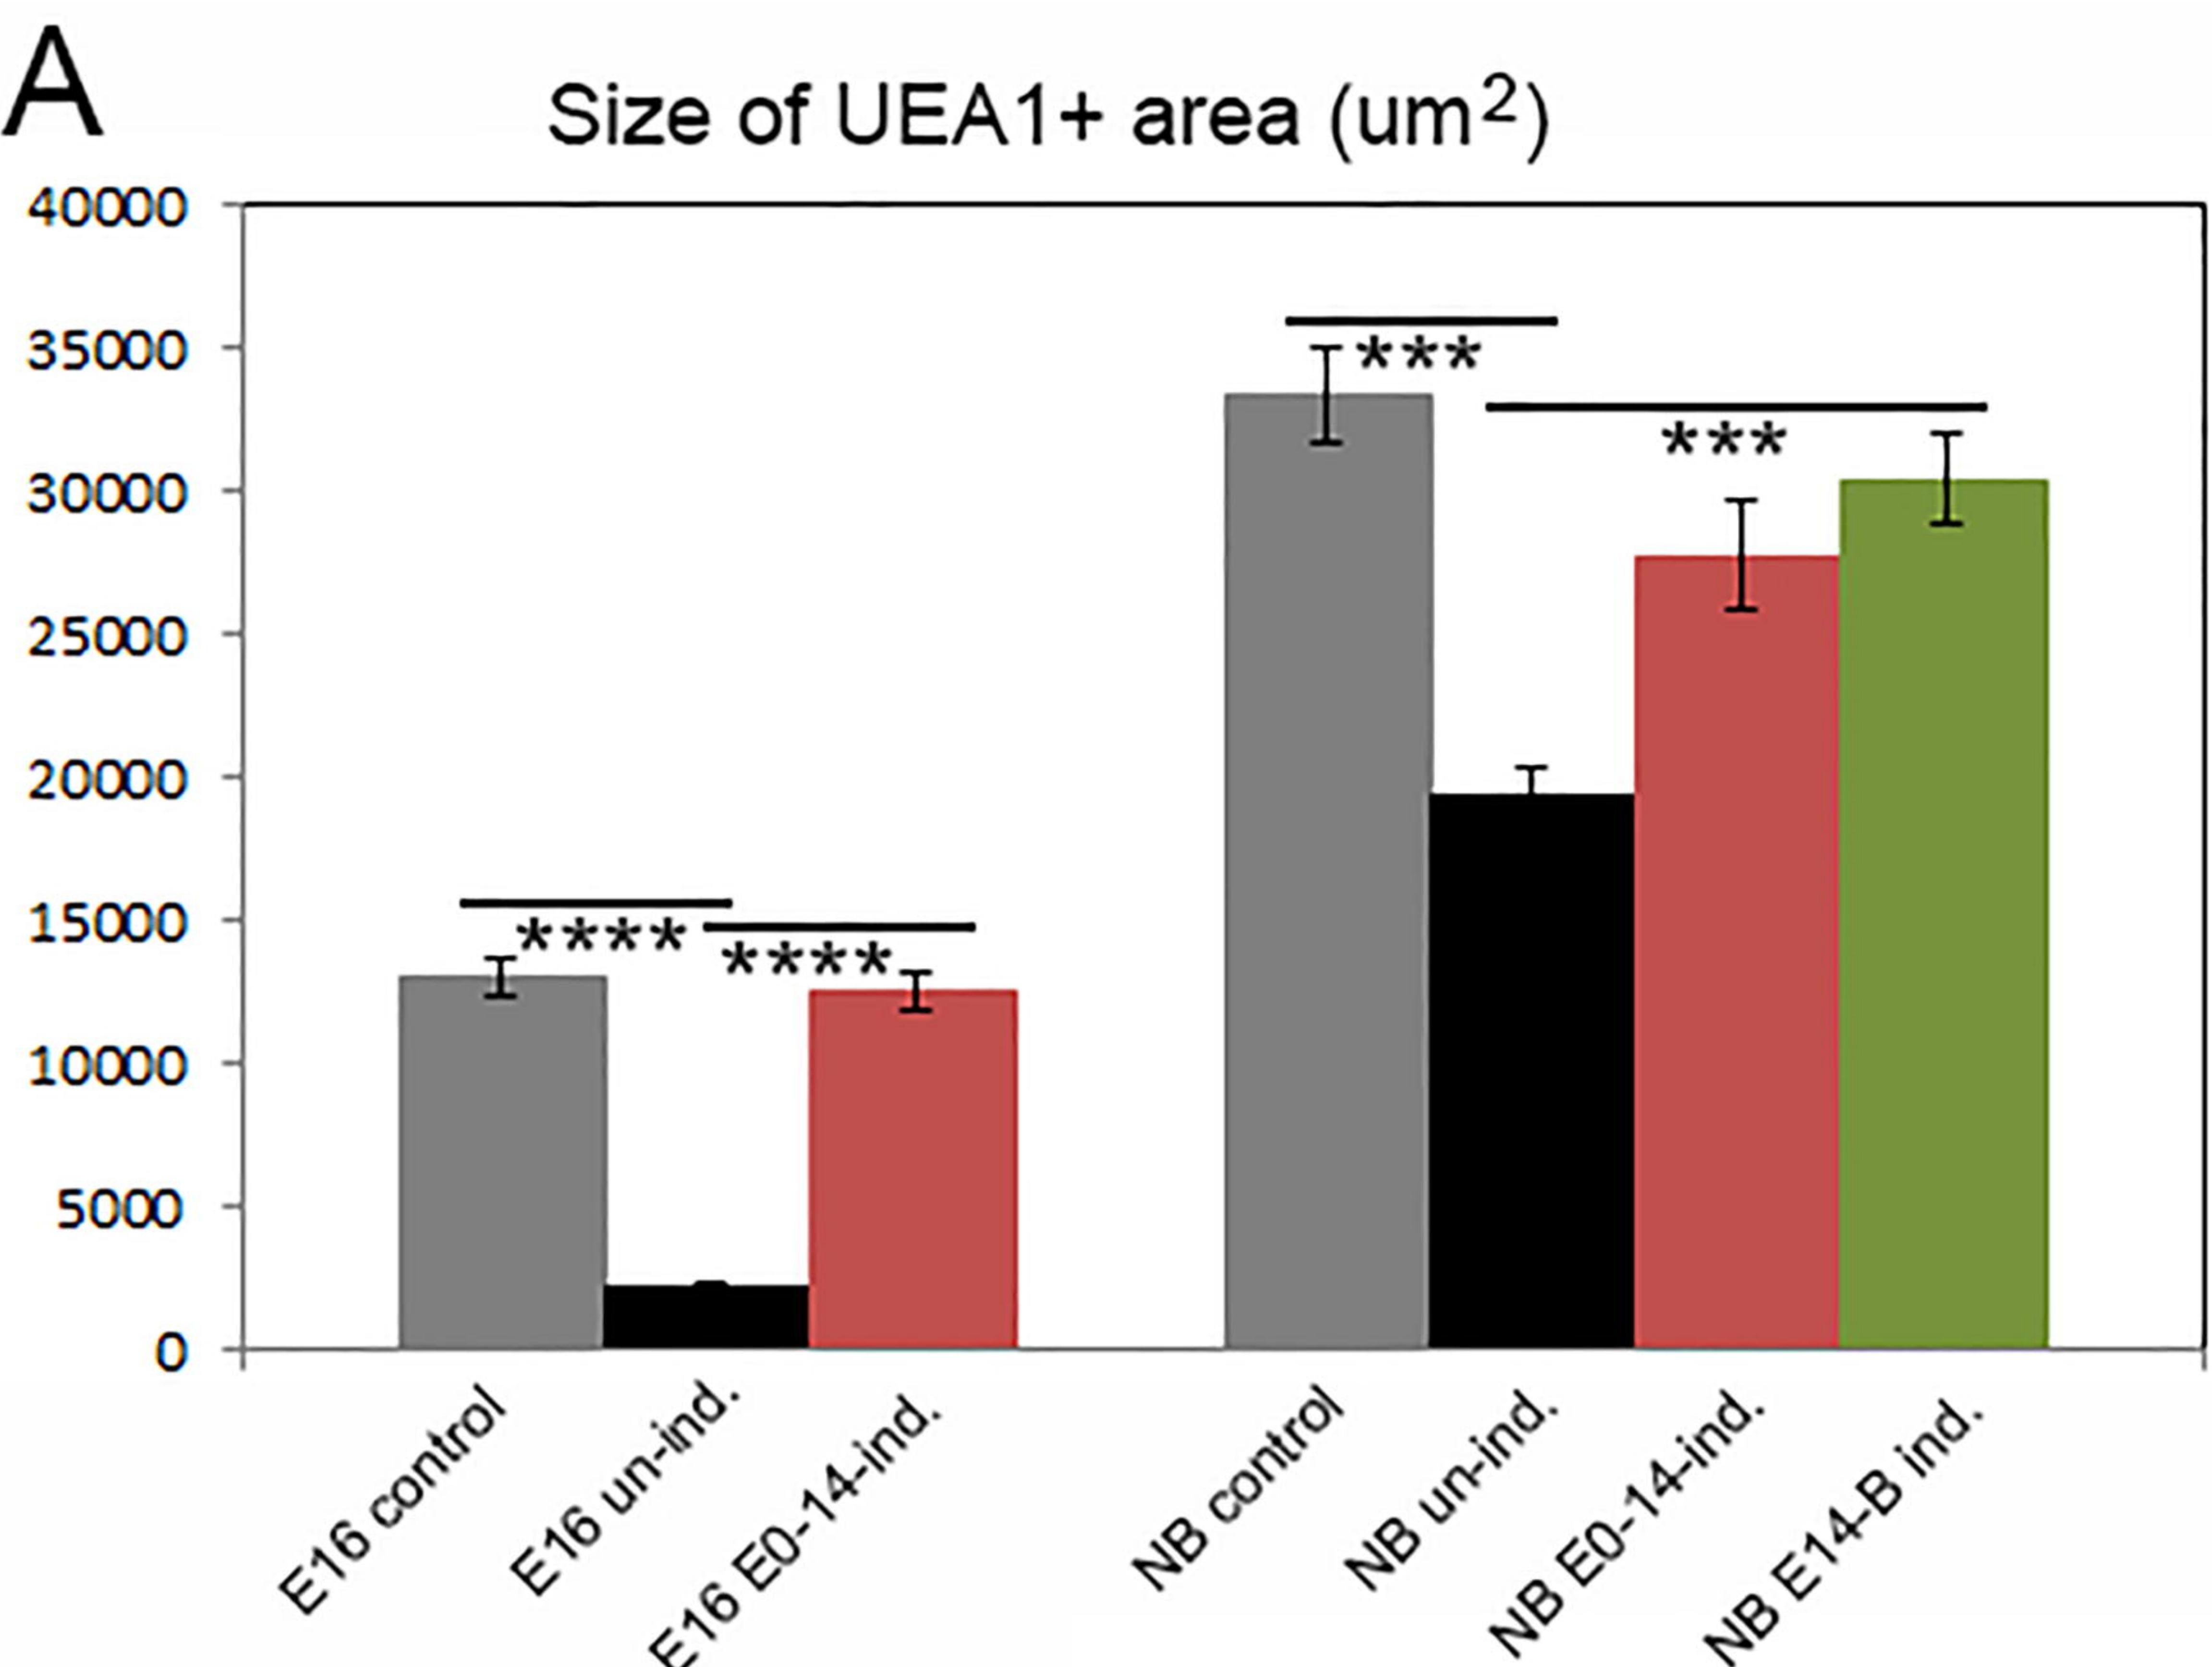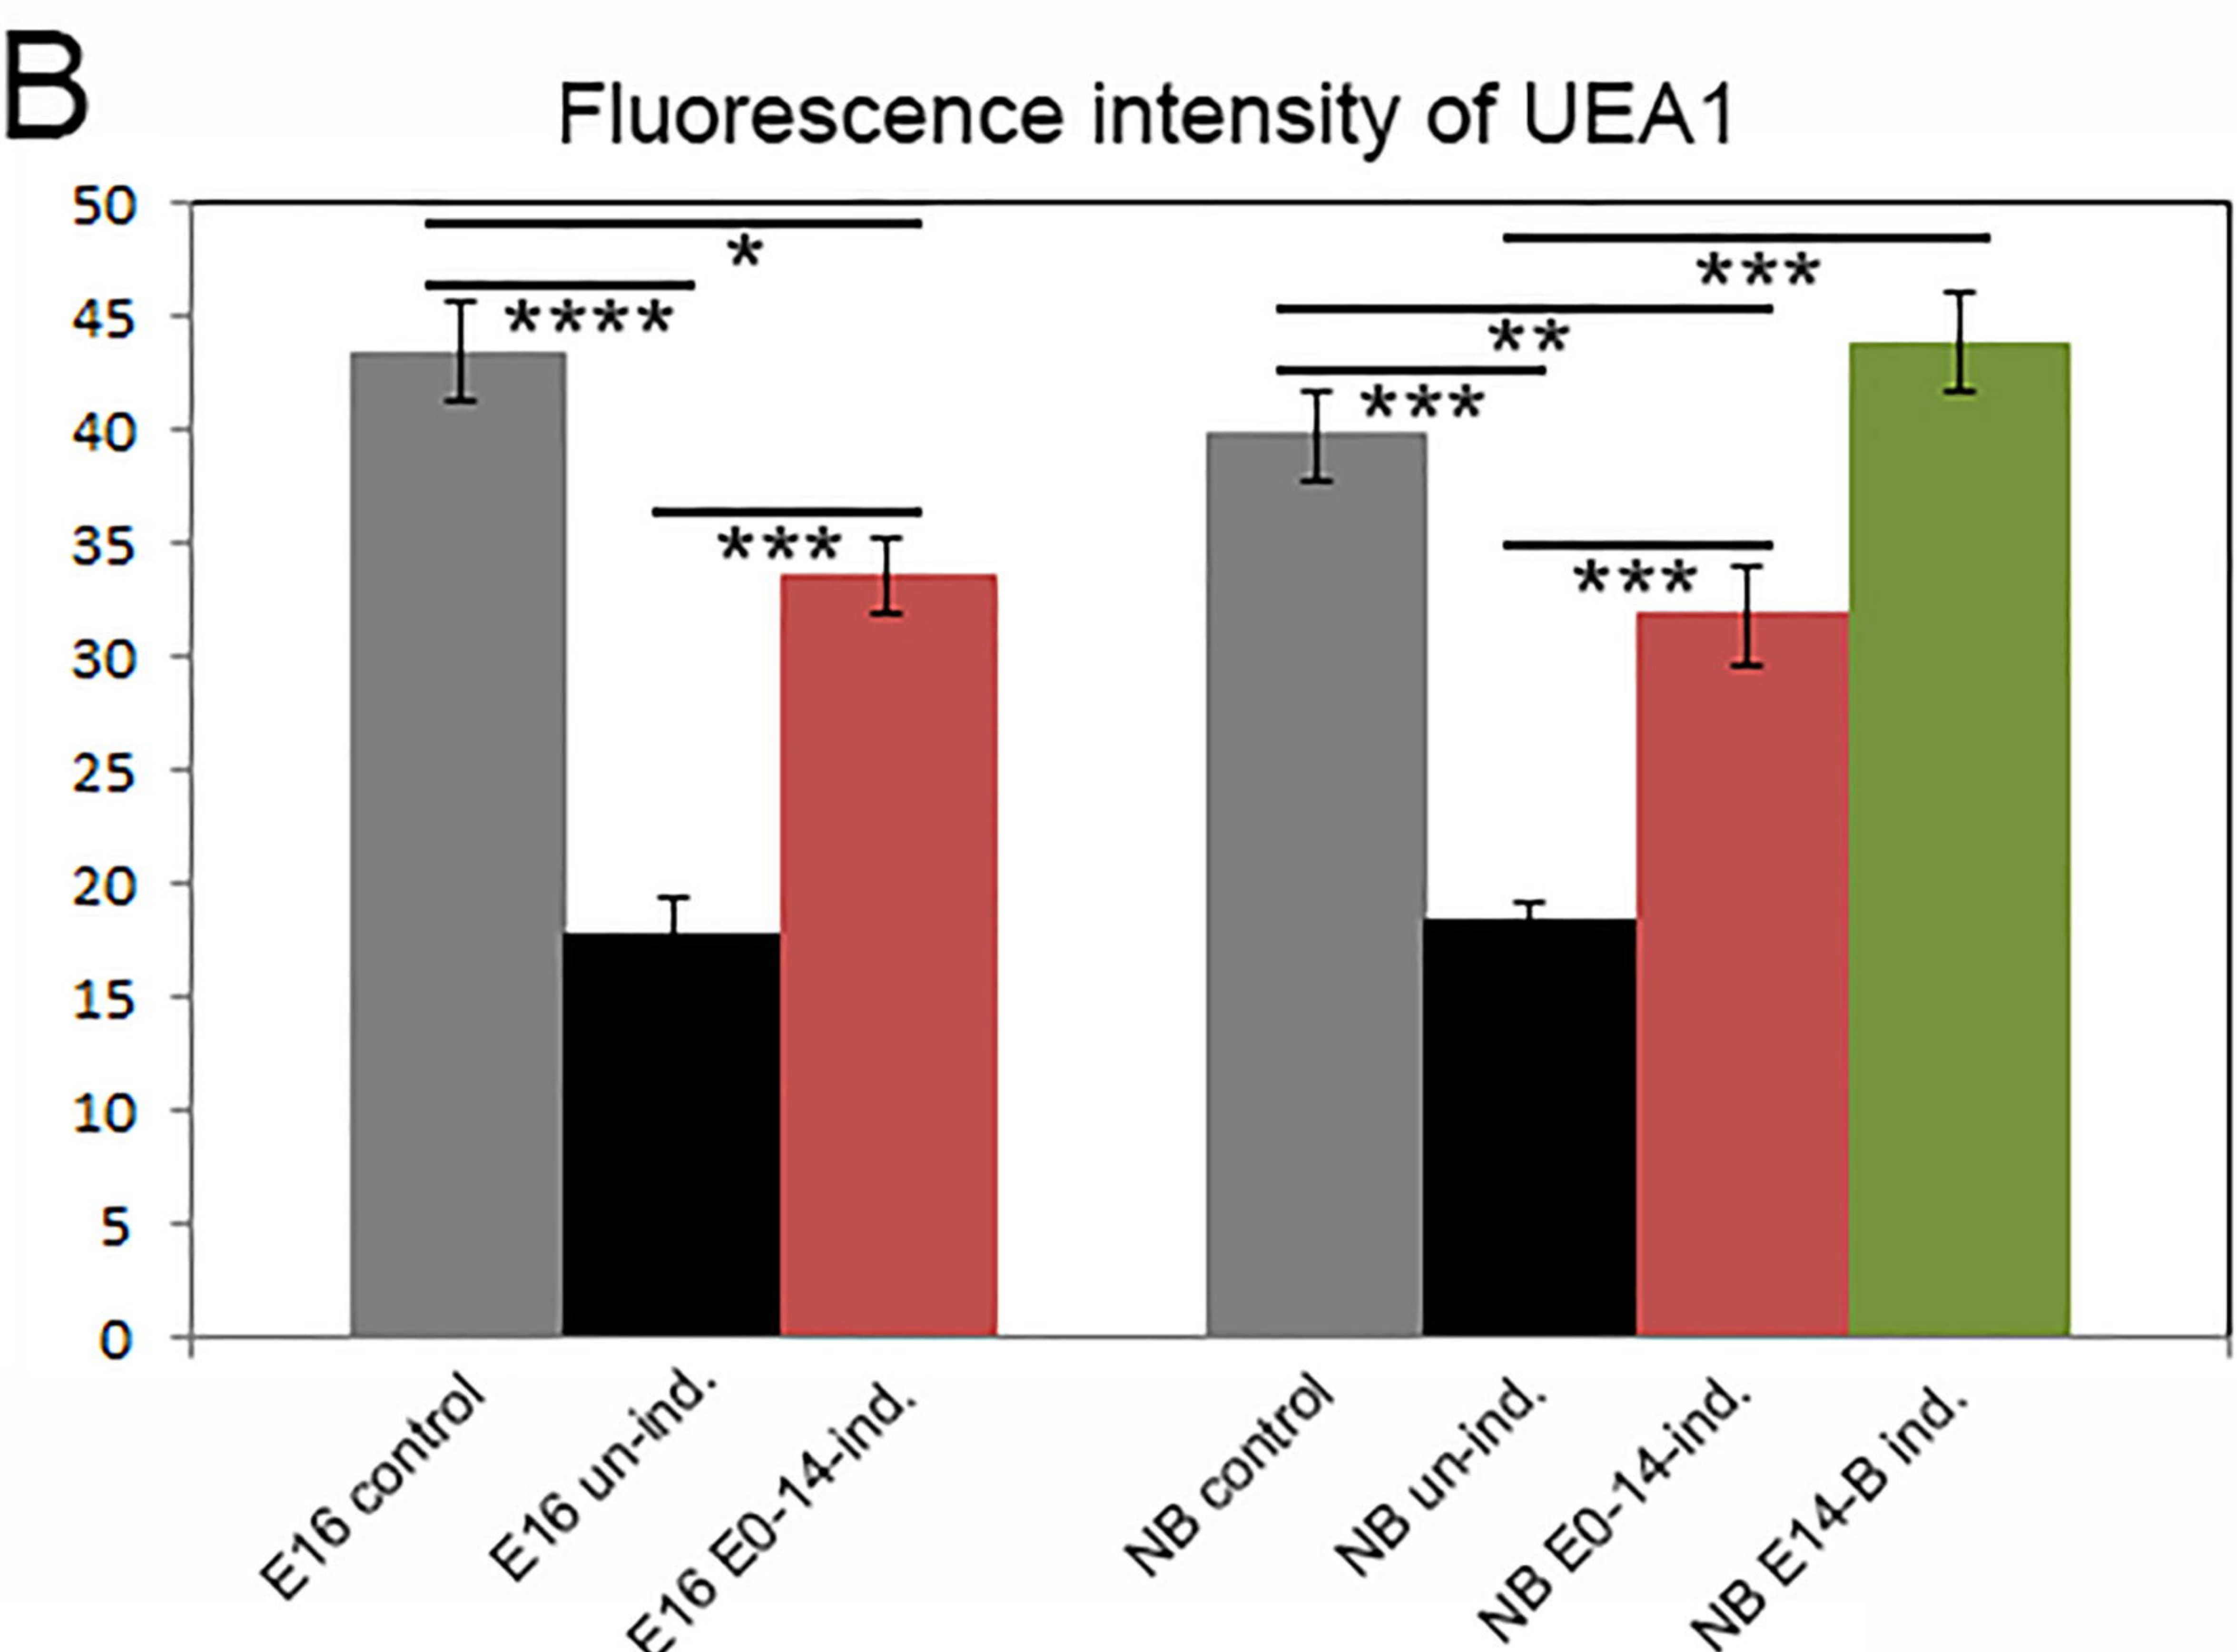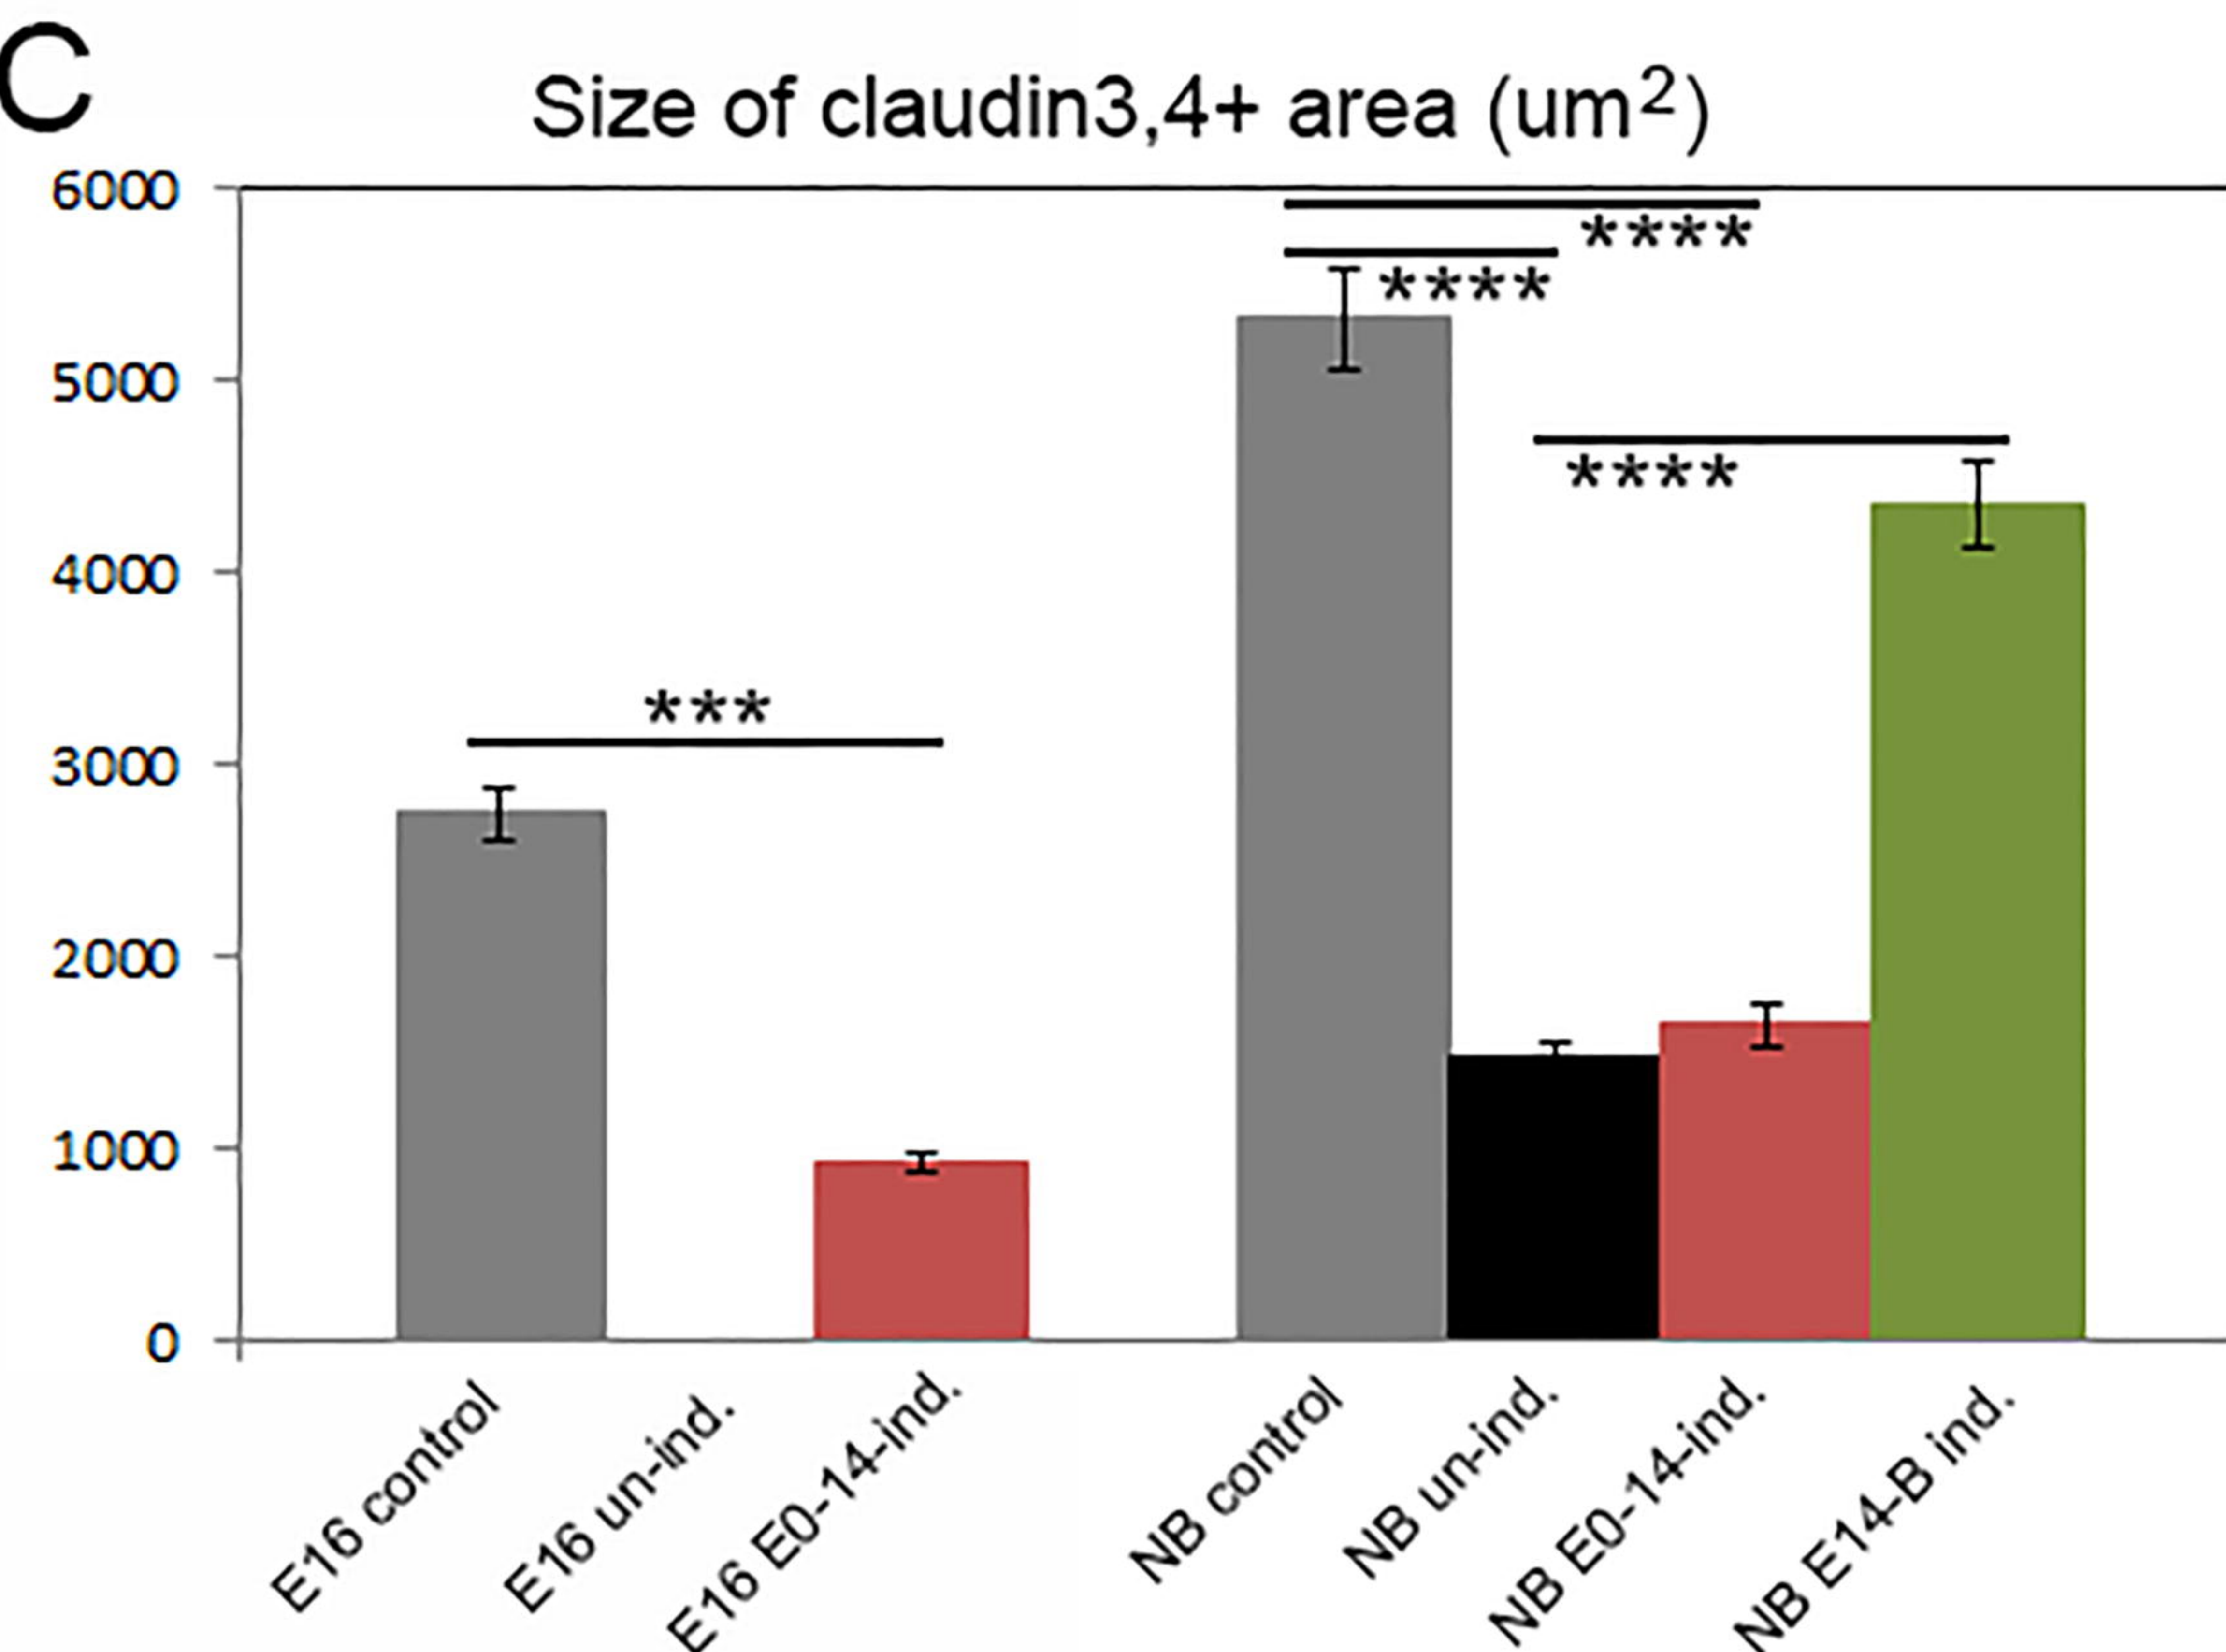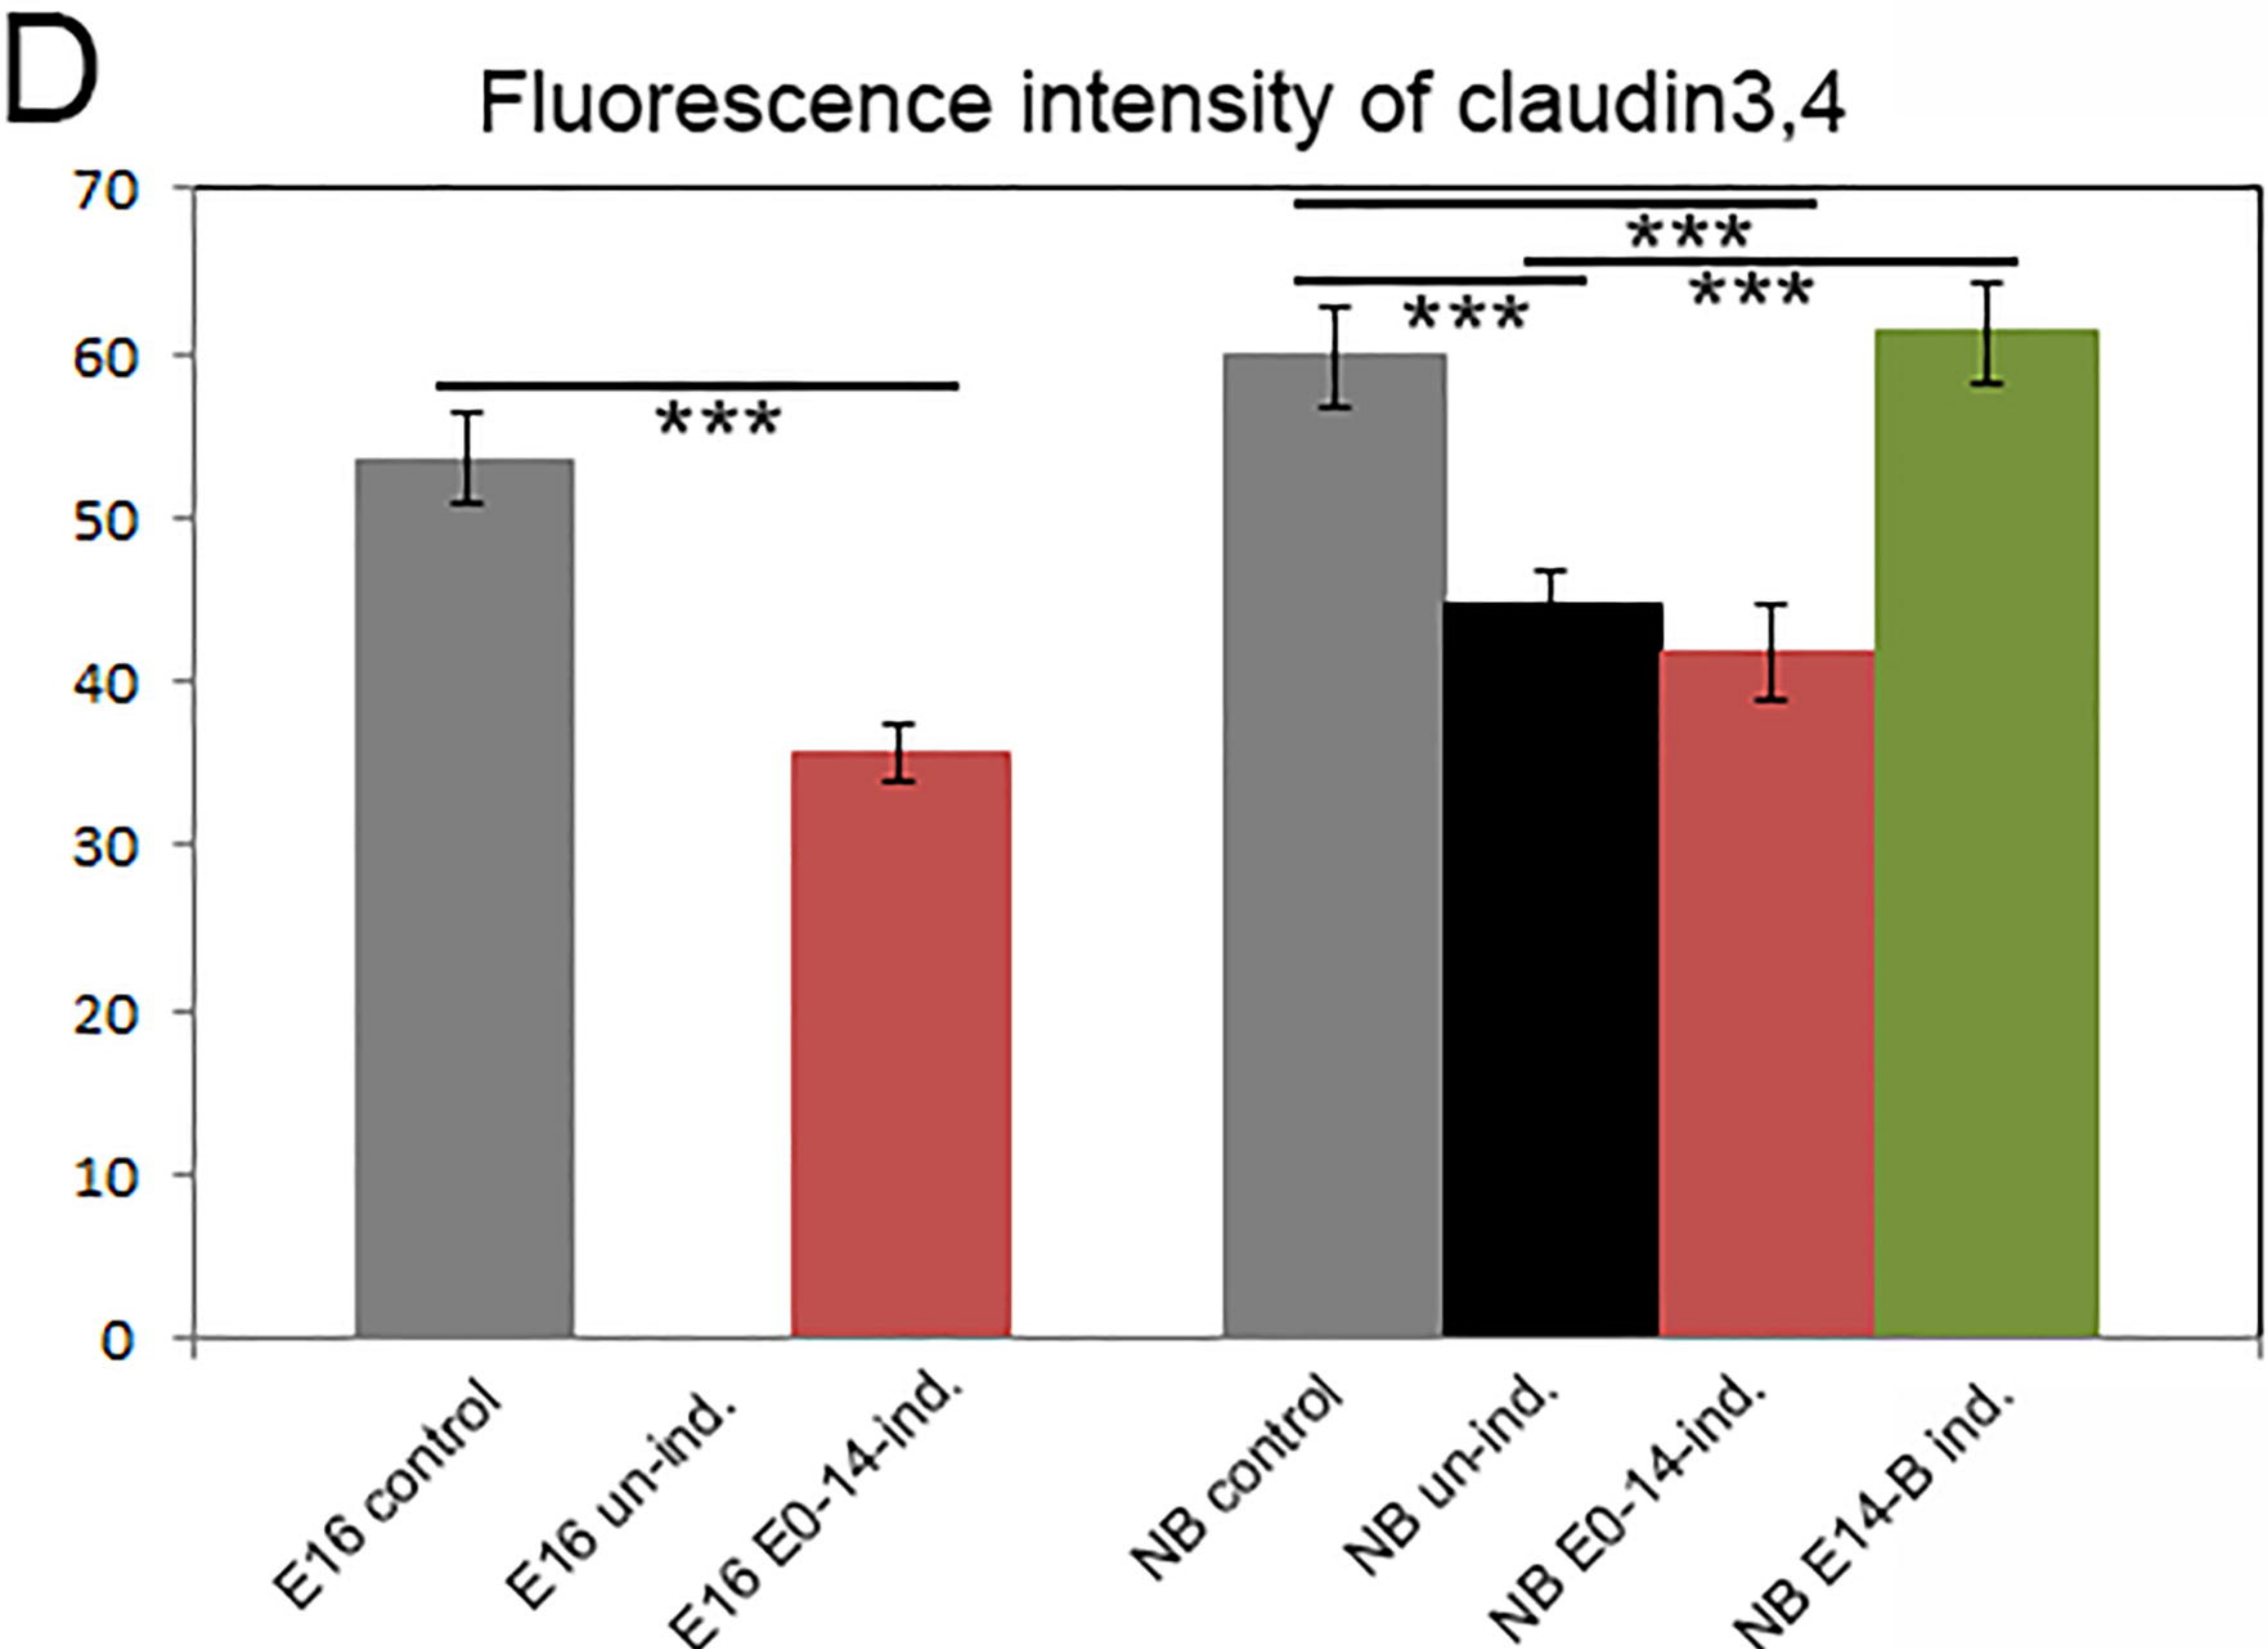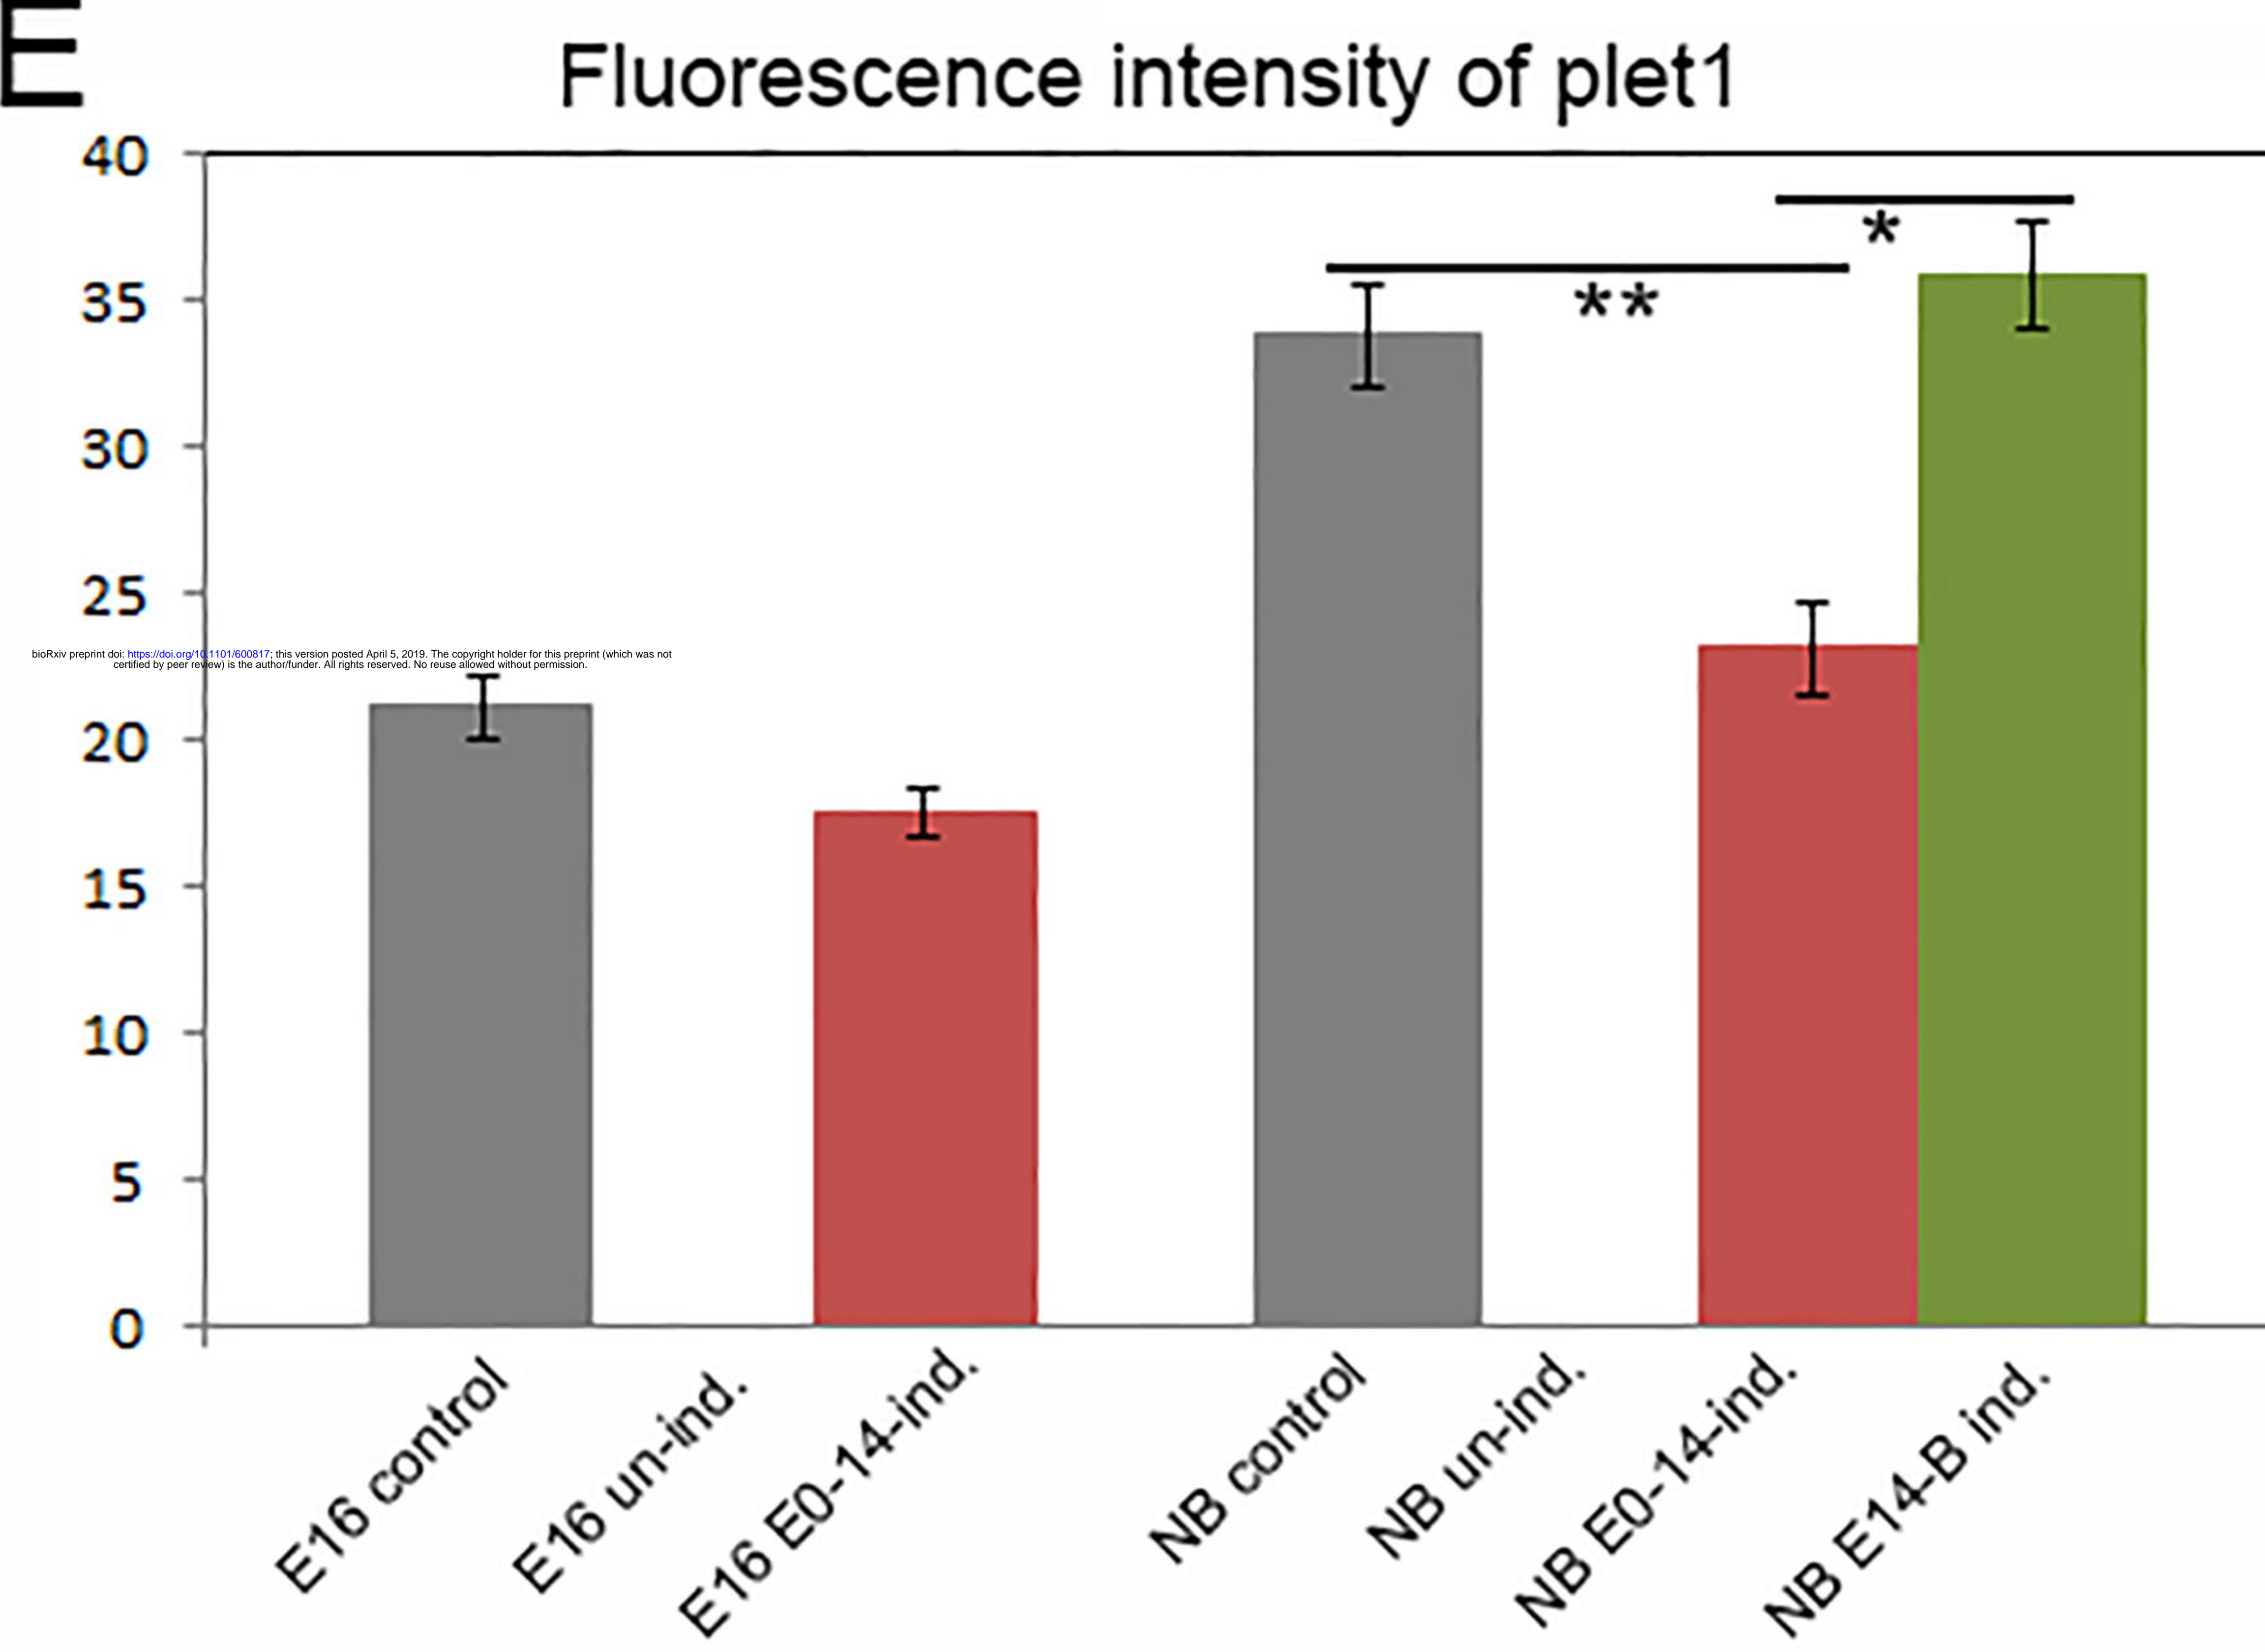



**Figure 9**

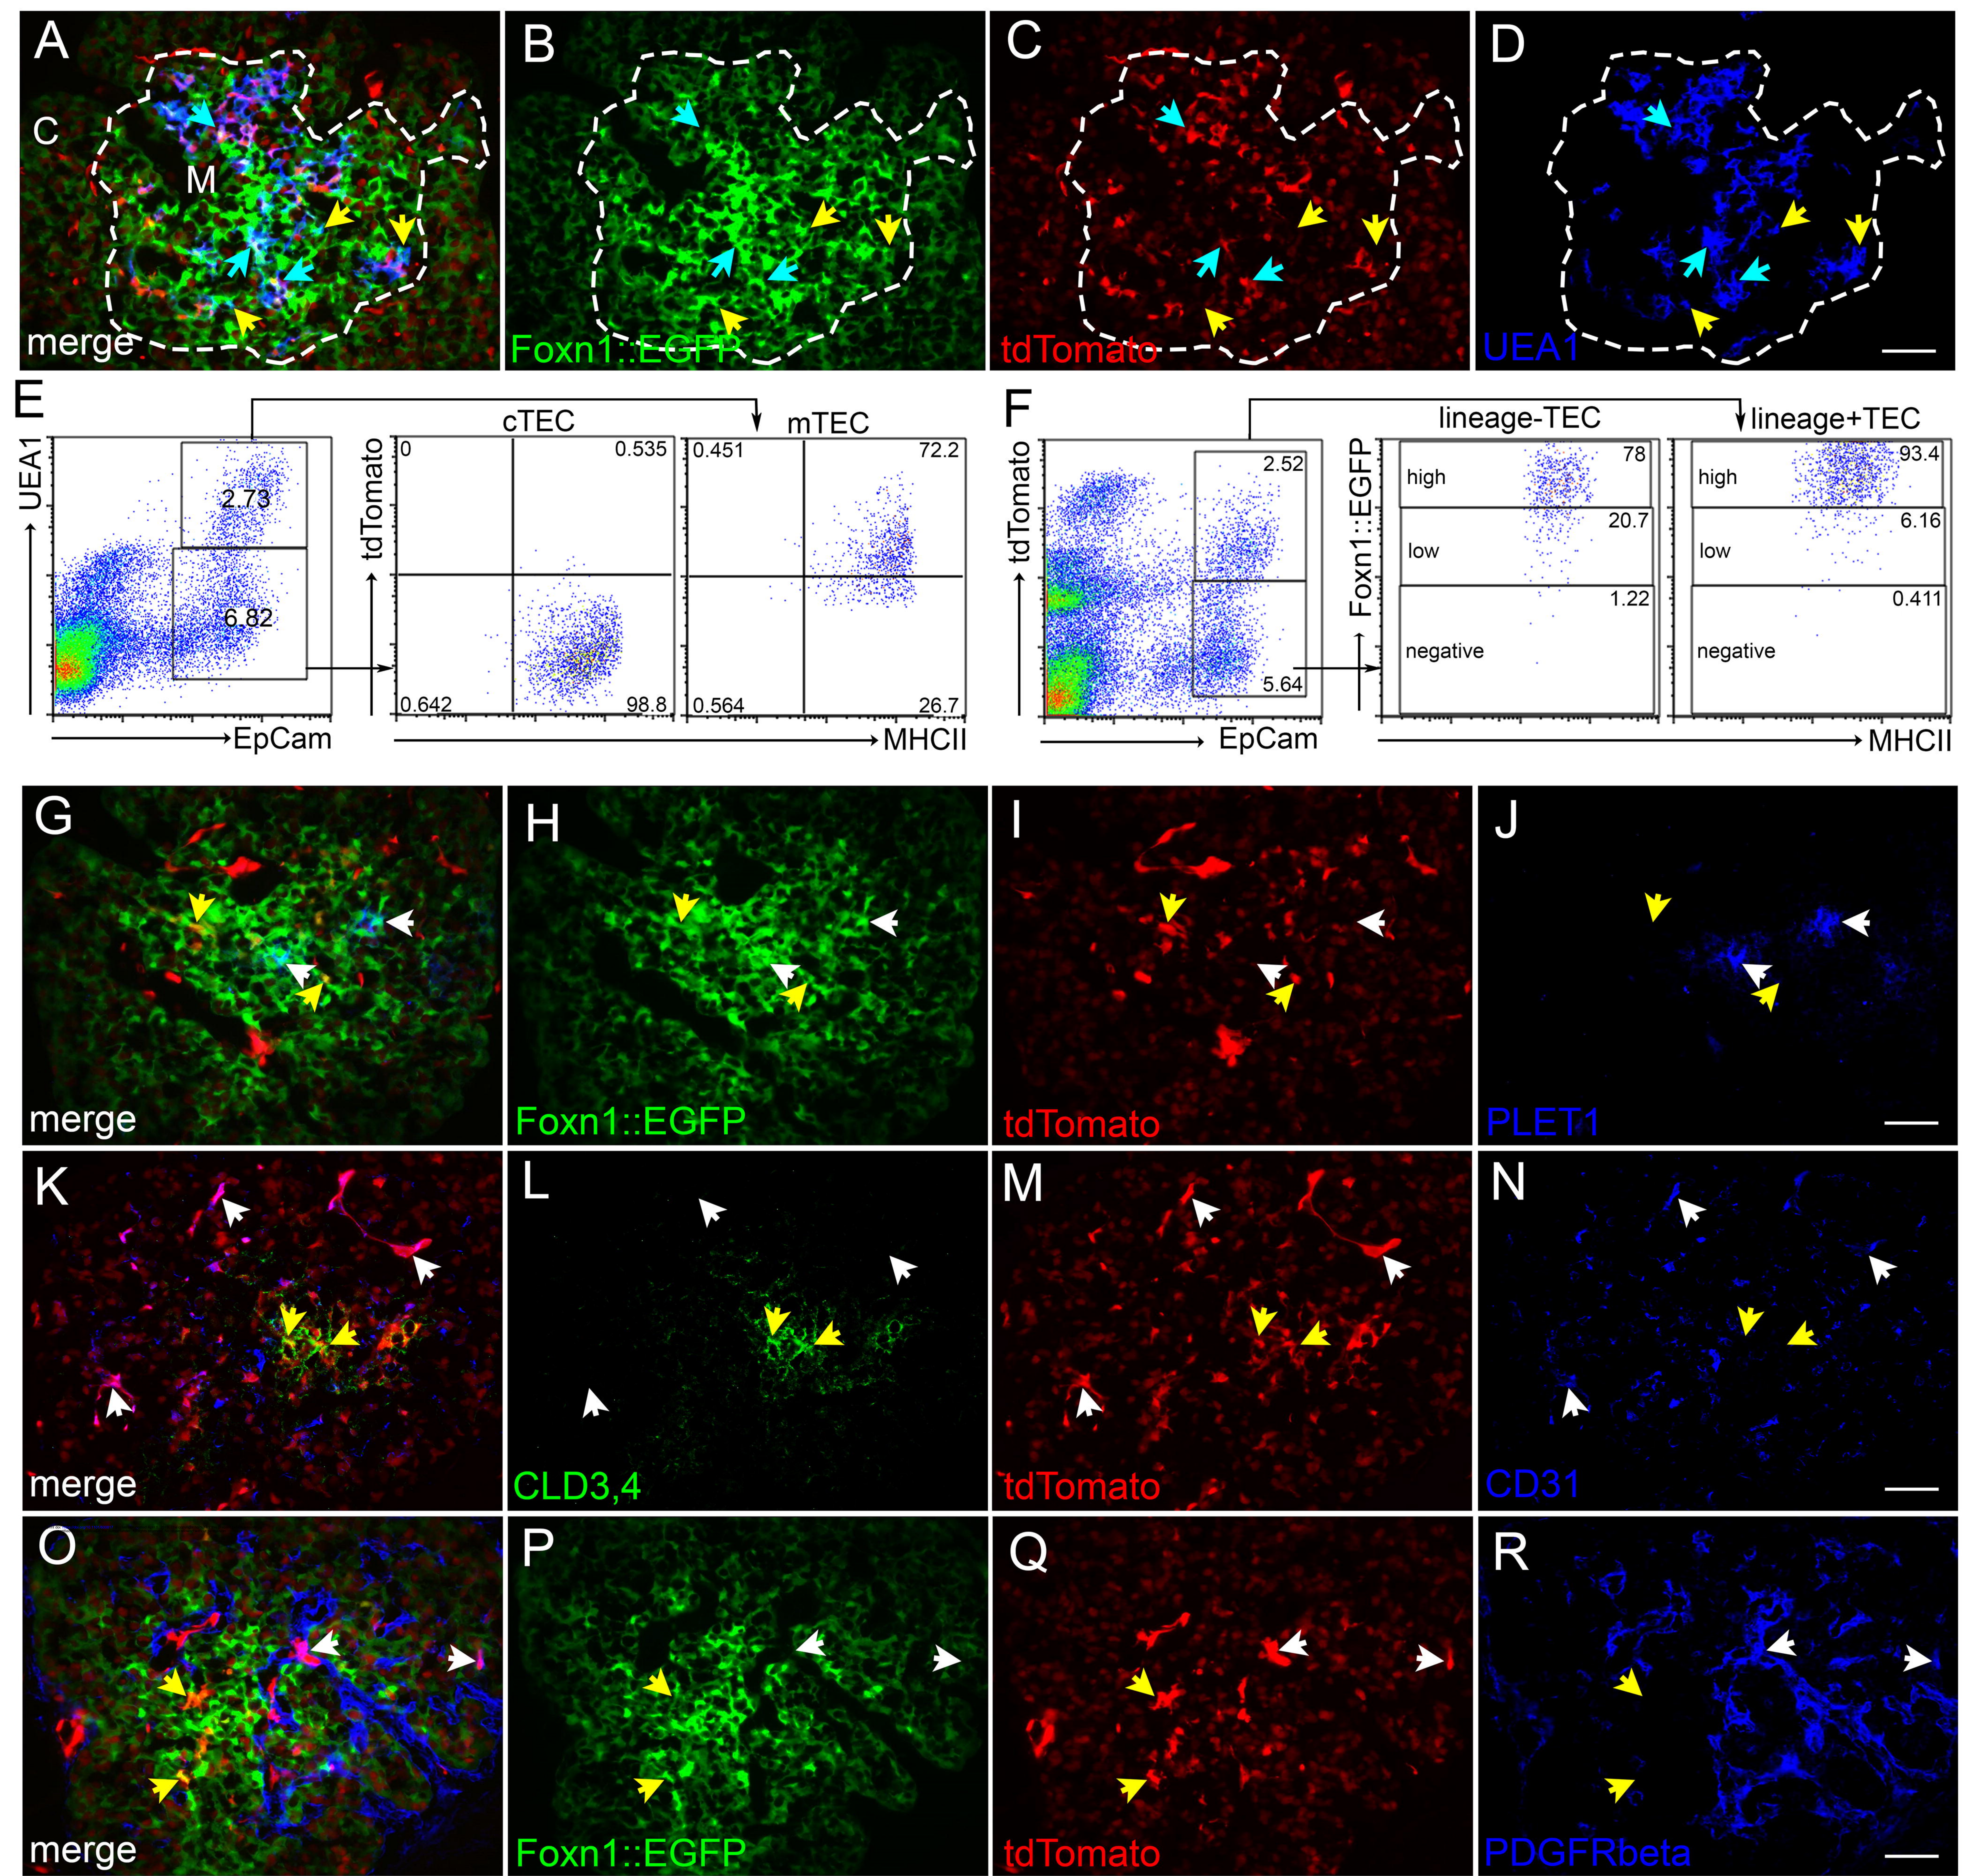



**Figure 10**

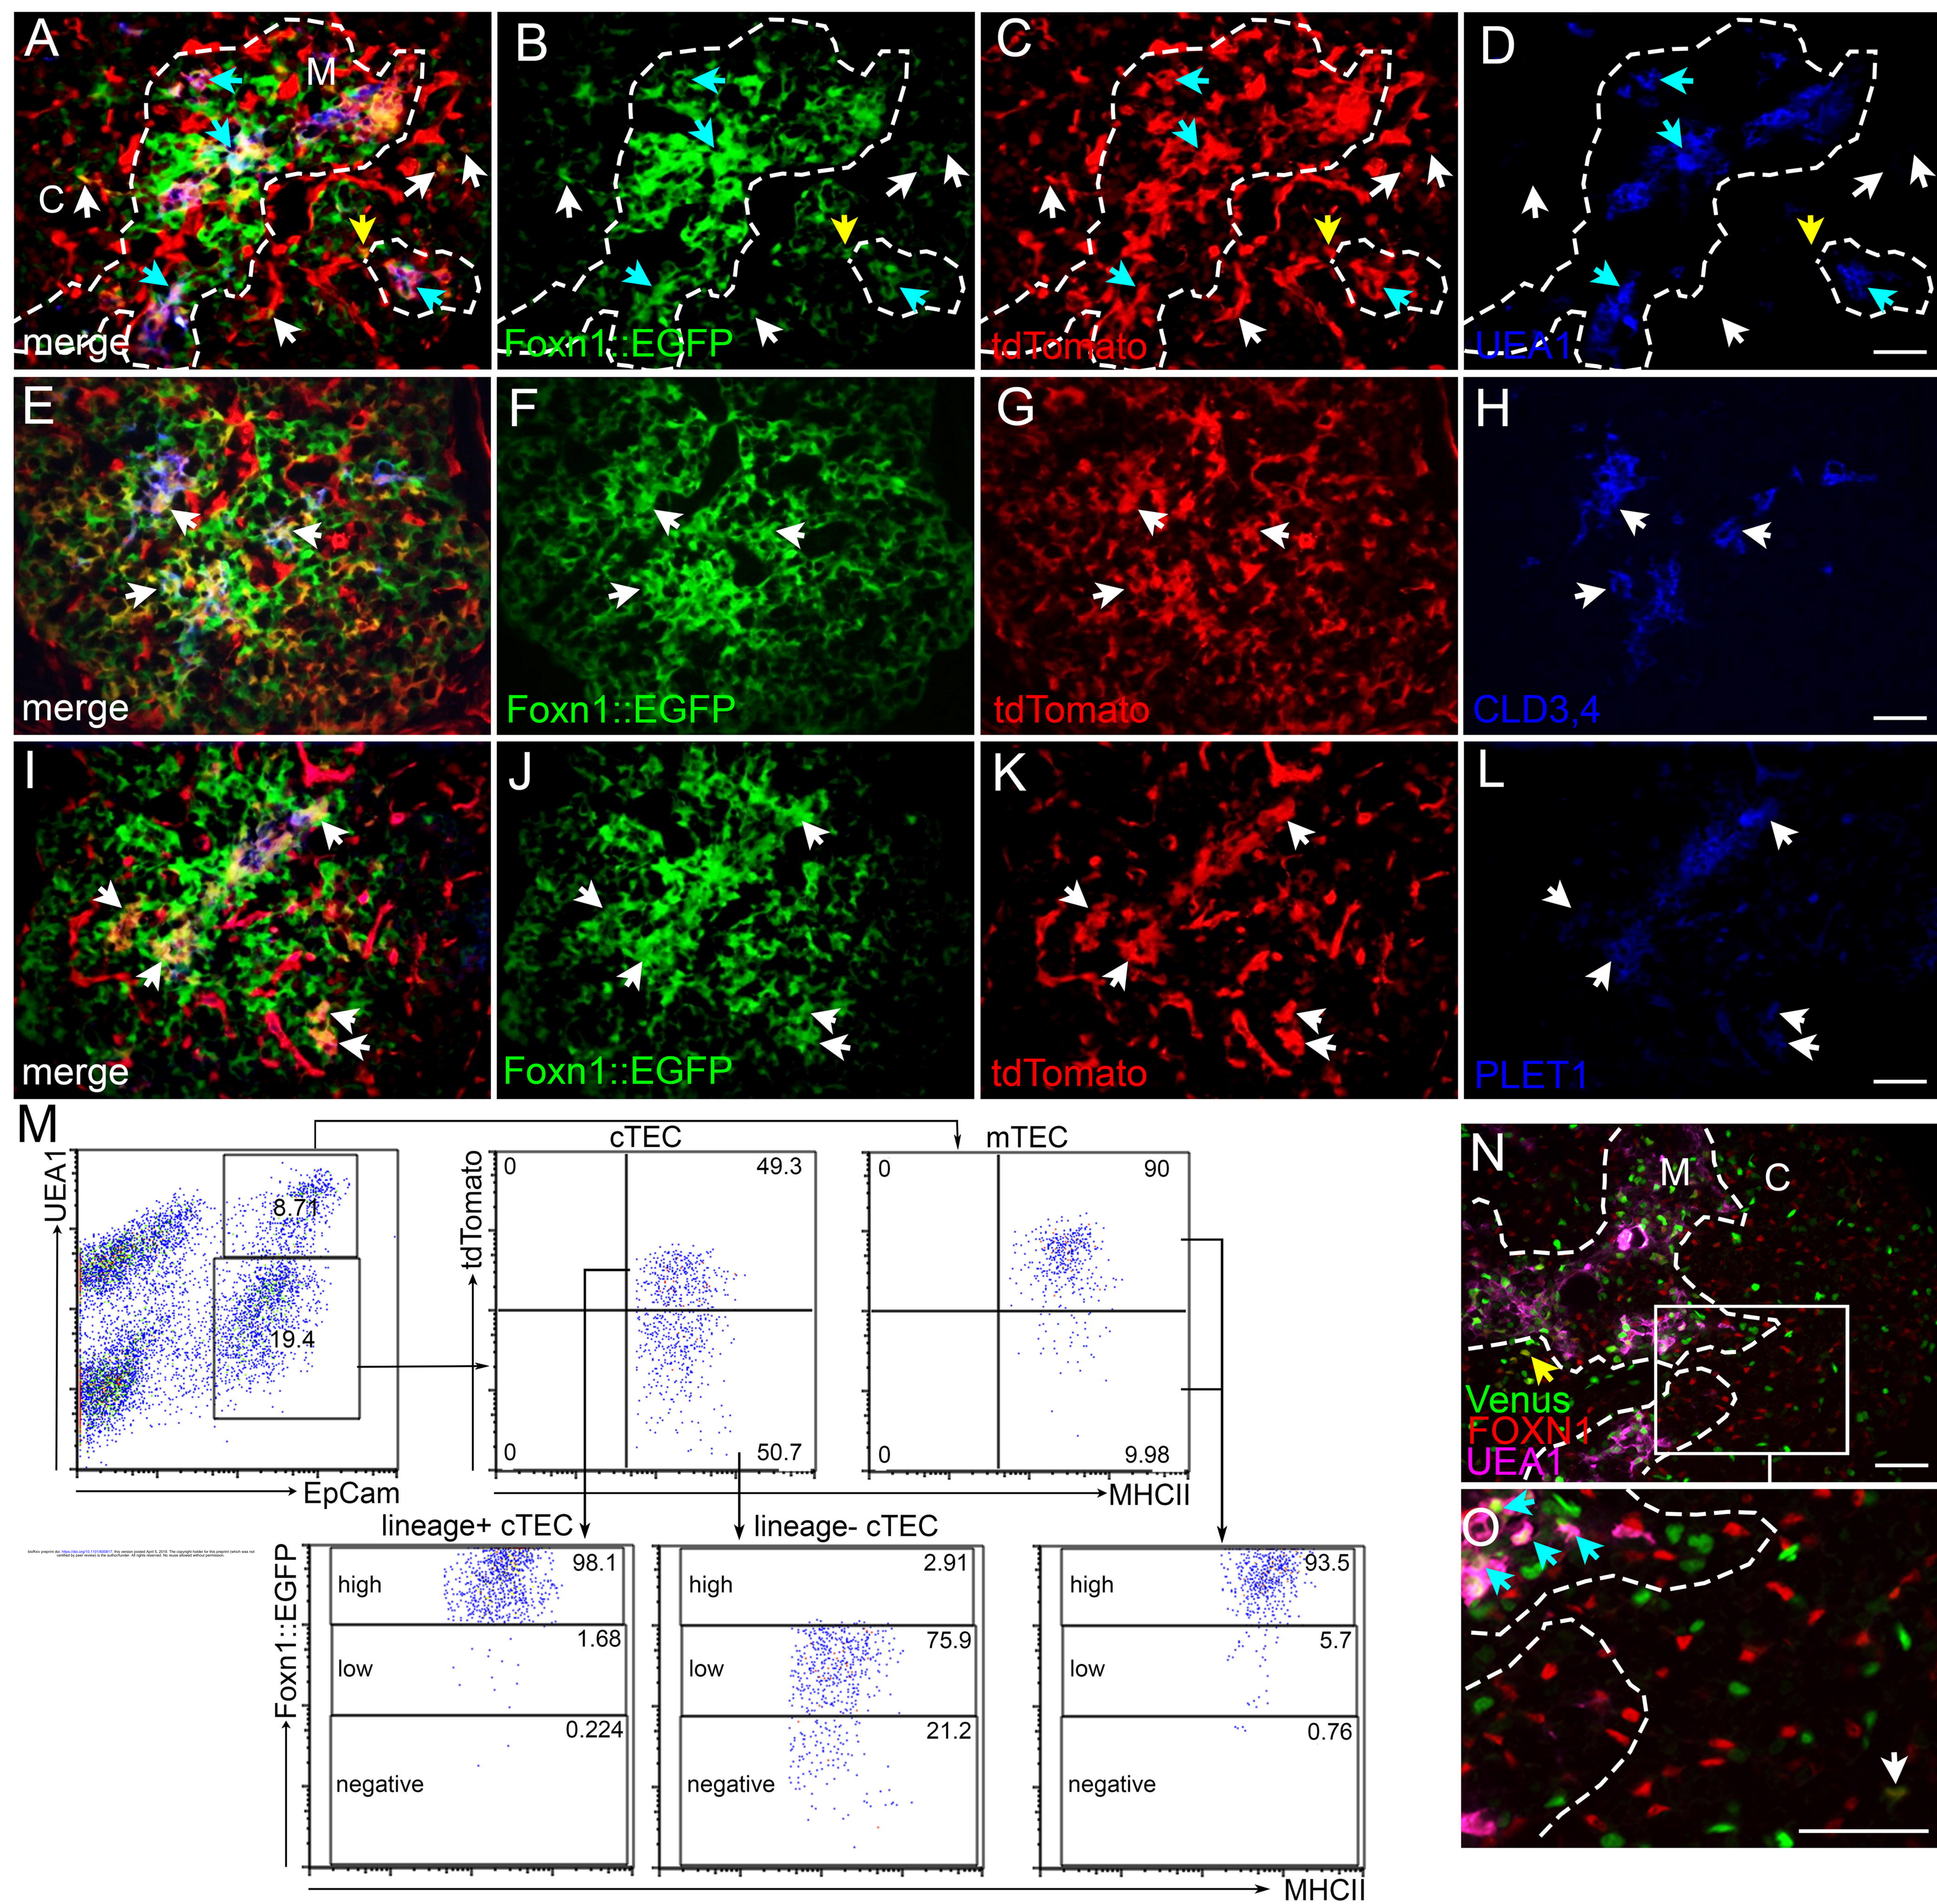



# Figure 11

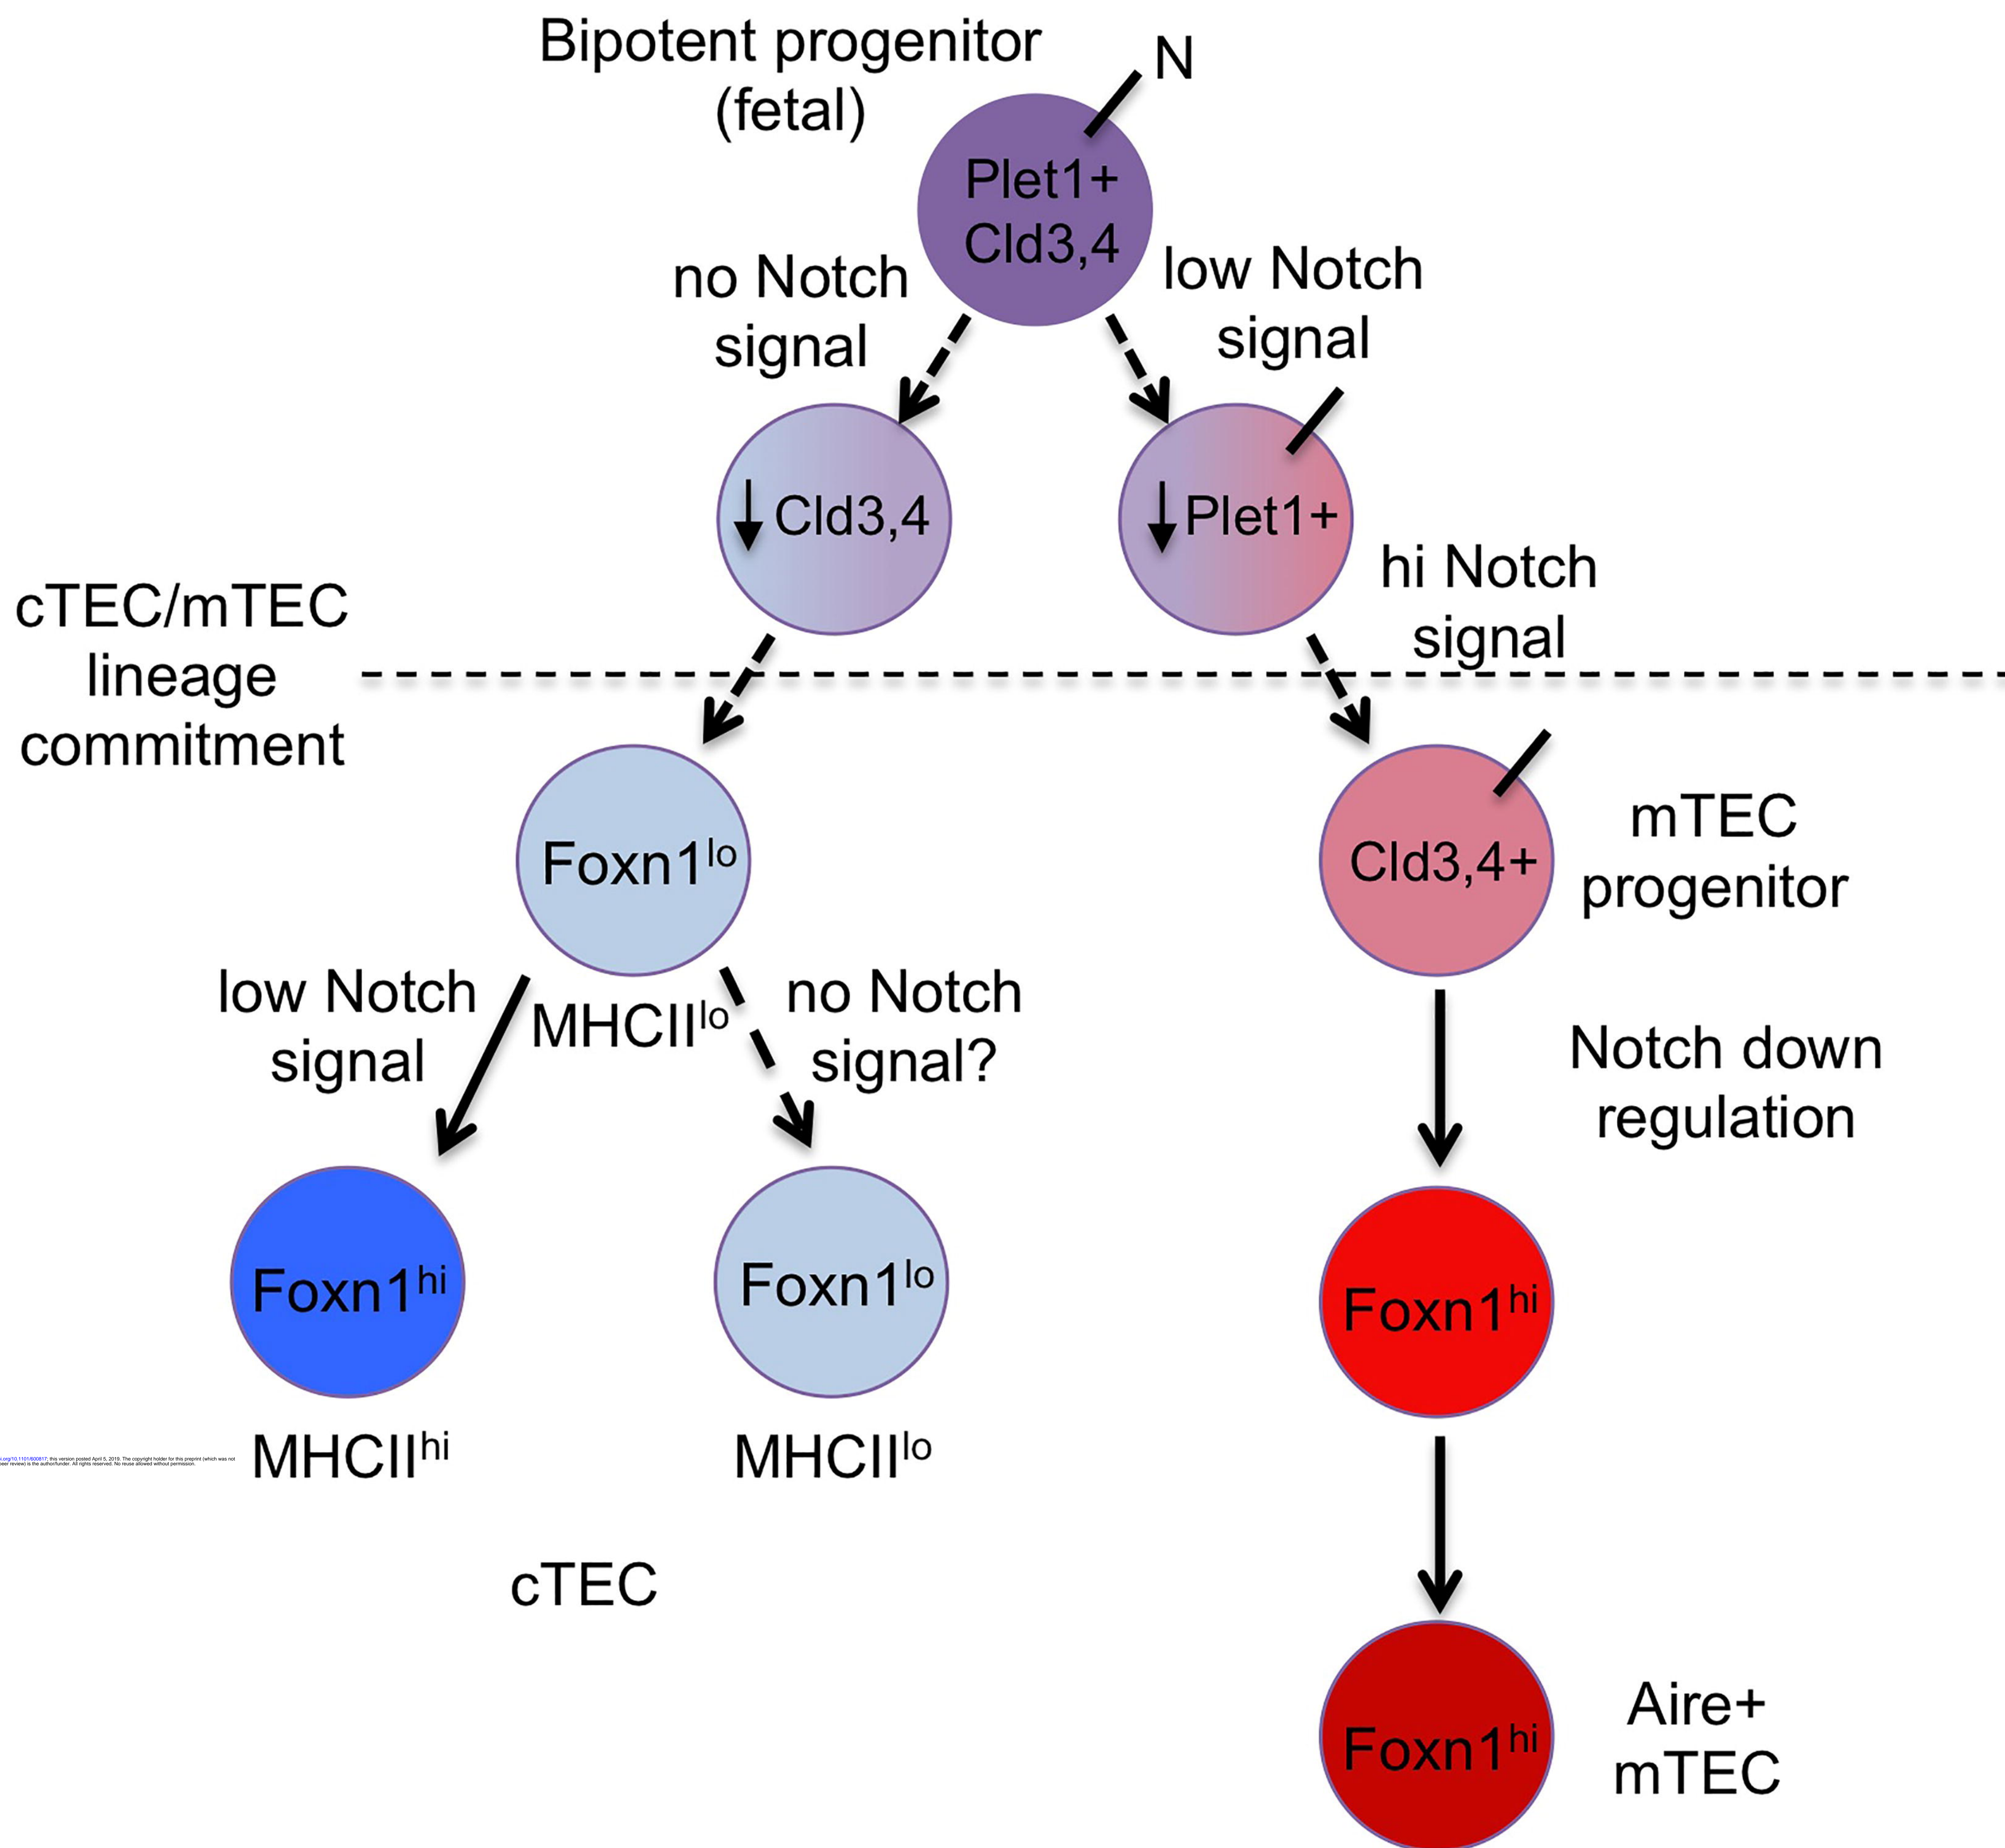

Source: http://biorxiv.org/content/10.1101/600817v1.full.pdf
